# Supplementary material for: Copper-catalyzed oxidative sulfenylation and alkylation of indolin-2-ones for direct construction of sulfur-substituted quaternary carbons
Source: Royal Society of Chemistry journal article supplement (doi:10.1039/d4qo00491d), 2024-01-01

## Table of contents

|                                                                                             |            |
|---------------------------------------------------------------------------------------------|------------|
| <b>1. General information .....</b>                                                         | <b>S2</b>  |
| <b>2. Optimization details .....</b>                                                        | <b>S2</b>  |
| <b>3. General procedure for the synthesis of C3-alkylated 3-thioxyindolin-2-one (4)....</b> | <b>S3</b>  |
| <b>4. Mechanistic studies .....</b>                                                         | <b>S3</b>  |
| <b>5. Characterization data for C3-alkylated 3-thioxyindolin-2-one (4) .....</b>            | <b>S6</b>  |
| <b>6. Spectroscopic data for C3-alkylated 3-thioxyindolin-2-one (4) .....</b>               | <b>S24</b> |
| <b>7. Spectroscopic data for compounds 5-8 .....</b>                                        | <b>S58</b> |

## 1. General information

**General information.** Unless otherwise noted, all reagents including the starting materials (indolin-2-ones, thiols and alkyl halides) are commercially available (purchased from Sigma-Aldrich, Aladdin, and Alfa Aesar) and were used without further purification. Melting points were determined with an X-4 apparatus and are uncorrected.  $^1\text{H}$  NMR and  $^{13}\text{C}$  NMR spectra were recorded on a Bruker AV-400 spectrometer with  $\text{DMSO-}d_6$  or  $\text{CDCl}_3$  as the solvent. Chemical shifts are reported relative to TMS as internal standard. The  $^1\text{H}$  NMR data are reported as the chemical shift in parts per million, multiplicity (s, singlet; d, doublet; t, triplet; m, multiplet), coupling constant in hertz, and number of protons. HRMS were obtained on an IonSpec FT-ICR mass spectrometer with ESI resource.

## 2. Optimization details

**Table S1.** Optimization of the reaction conditions.<sup>a</sup>

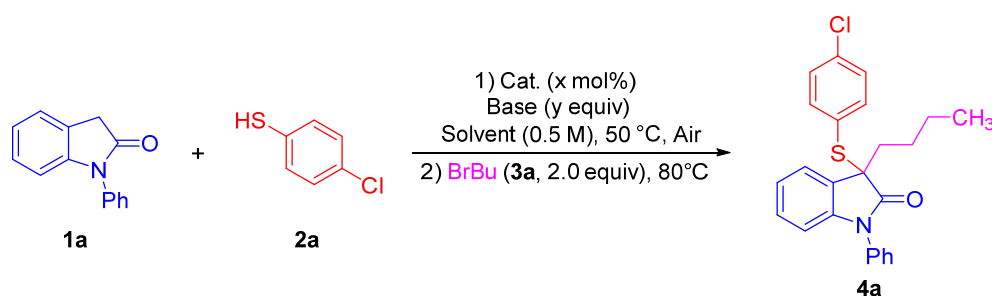

| Entry          | Cat. (10 mol%)                                       | Base (equiv)                  | Solvent (0.5 M) | Time (h) | Yield (%) |
|----------------|------------------------------------------------------|-------------------------------|-----------------|----------|-----------|
| 1              | CuTc                                                 | $\text{K}_2\text{CO}_3(2.0)$  | DMF             | 1.5      | 72        |
| 2              | ---                                                  | $\text{K}_2\text{CO}_3(2.0)$  | DMF             | 1.5      | 42        |
| 3              | CuTc                                                 | ---                           | DMF             | 1.5      | 0         |
| 4 <sup>b</sup> | CuTc                                                 | $\text{K}_2\text{CO}_3(2.0)$  | DMF             | 1.5      | 59        |
| 5              | CuTc                                                 | $\text{K}_2\text{CO}_3(1.0)$  | DMF             | 1.5      | 43        |
| 6              | CuCl                                                 | $\text{K}_2\text{CO}_3(2.0)$  | DMF             | 1.5      | 36        |
| 7              | CuBr                                                 | $\text{K}_2\text{CO}_3(2.0)$  | DMF             | 1.5      | 19        |
| 8              | CuI                                                  | $\text{K}_2\text{CO}_3(2.0)$  | DMF             | 1.5      | 52        |
| 9              | $\text{Cu}(\text{OAc})_2 \cdot \text{H}_2\text{O}$   | $\text{K}_2\text{CO}_3(2.0)$  | DMF             | 1.5      | 53        |
| 10             | $\text{FeCl}_3$                                      | $\text{K}_2\text{CO}_3(2.0)$  | DMF             | 1.5      | 41        |
| 11             | $\text{Fe}(\text{NO}_3)_3 \cdot 9\text{H}_2\text{O}$ | $\text{K}_2\text{CO}_3(2.0)$  | DMF             | 1.5      | 60        |
| 12             | $\text{FeCl}_2 \cdot 4\text{H}_2\text{O}$            | $\text{K}_2\text{CO}_3(2.0)$  | DMF             | 1.5      | 35        |
| 13             | CuTc                                                 | $\text{K}_2\text{CO}_3(2.0)$  | DMF             | 1.5      | 72        |
| 14             | CuTc                                                 | $\text{Na}_2\text{CO}_3(2.0)$ | DMF             | 1.5      | 17        |

|                 |      |                                       |                  |     |       |
|-----------------|------|---------------------------------------|------------------|-----|-------|
| 15              | CuTc | Cs <sub>2</sub> CO <sub>3</sub> (2.0) | DMF              | 1.5 | 71    |
| 16              | CuTc | tBuOK(2.0)                            | DMF              | 1.5 | <5    |
| 17              | CuTc | NaOH(2.0)                             | DMF              | 1.5 | trace |
| 18              | CuTc | KOH(2.0)                              | DMF              | 1.5 | <5    |
| 19              | CuTc | piperidine(2.0)                       | DMF              | 2.5 | <5    |
| 20              | CuTc | TEA (2.0)                             | DMF              | 2.5 | 21    |
| 21              | CuTc | K <sub>2</sub> CO <sub>3</sub> (2.0)  | DMAc             | 1.5 | 59    |
| 22              | CuTc | K <sub>2</sub> CO <sub>3</sub> (2.0)  | DMSO             | 1.5 | 82    |
| 23              | CuTc | K <sub>2</sub> CO <sub>3</sub> (2.0)  | EtOH             | 1.5 | 5     |
| 24              | CuTc | K <sub>2</sub> CO <sub>3</sub> (2.0)  | H <sub>2</sub> O | 1.5 | 0     |
| 25              | CuTc | K <sub>2</sub> CO <sub>3</sub> (2.0)  | PhCl             | 1.5 | 11    |
| 26              | CuTc | K <sub>2</sub> CO <sub>3</sub> (2.0)  | DCE              | 1.5 | 0     |
| 27 <sup>c</sup> | CuTc | K <sub>2</sub> CO <sub>3</sub> (2.0)  | DMSO             | 2   | 64    |
| 28 <sup>d</sup> | CuTc | K <sub>2</sub> CO <sub>3</sub> (2.0)  | DMSO             | 2   | 62    |
| 29 <sup>e</sup> | CuTc | K <sub>2</sub> CO <sub>3</sub> (2.0)  | DMSO             | 1.5 | 75    |

<sup>a</sup> Reaction conditions: **1a** (1.0 mmol, 1.0 equiv), **2a** (1.0 mmol, 1.0 equiv), **3a** (2.0 mmol, 2.0 equiv), solvent (2.0 mL), under open air.

<sup>b</sup> CuTc 20 mol%.

<sup>c</sup> DMSO 0.25 M.

<sup>d</sup> DMSO 0.1 M.

<sup>e</sup> Under pure O<sub>2</sub>.

### 3. General procedure for the synthesis of C3-alkylated 3-thioxyindolin-2-one (**4**)

In a 10-mL reaction vial, equipped with a magnetic stirring bar, indolin-2-ones (1.0 mmol, 1.0 equiv), aryl thiols (1.0 mmol, 1.0 equiv), K<sub>2</sub>CO<sub>3</sub> (2.0 mmol, 2.0 equiv, 276.4 mg) and CuTc (10 mol%, 16.2 mg) were added to DMSO (2.0 mL). Then the vial was placed in a pre-heated metal block at 50 °C in the presence of ambient air. After stirring for 1 hour, alkyl halides (2.0 mmol, 2.0 equiv) was added to the mixture and heated up to 80 °C. The reaction was monitored by TLC. After completion of the reaction, the mixture was quenched with a saturated aqueous solution of NH<sub>4</sub>Cl (15 mL) and extracted with ethyl acetate (2×20 mL). After drying with anhydrous Na<sub>2</sub>SO<sub>4</sub>, the organic layer was concentrated under reduced pressure and the residue was purified by column chromatography on silica gel (200–300 mesh) using petroleum/ethyl acetate (20/1–10/1) as eluent to afford the pure product.

### 4. Mechanistic studies

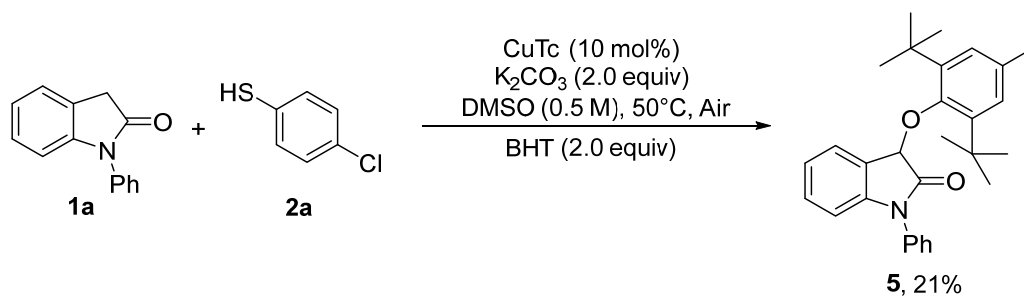

In a 10-mL reaction vial, equipped with a magnetic stirring bar, 1-phenylindolin-2-one (**1a**, 1.0 mmol, 209 mg), 4-chlorobenzenethiol (**2a**, 1.0 mmol, 144 mg),  $\text{K}_2\text{CO}_3$  (2.0 mmol, 276.4 mg), CuTc (10 mol%, 16.2 mg) and BHT (2.0 mmol, 440.7 mg) were added to DMSO (2.0 mL). Then the vial was placed in a pre-heated metal block at 50 °C in the presence of ambient air. The reaction was monitored by TLC. After completion of the reaction, the mixture was quenched with a saturated aqueous solution of  $\text{NH}_4\text{Cl}$  (15 mL) and extracted with ethyl acetate (2×20 mL). After drying with anhydrous  $\text{Na}_2\text{SO}_4$ , the organic layer was concentrated under reduced pressure and the residue was purified by column chromatography on silica gel (200–300 mesh) using petroleum/ethyl acetate (20/1–10/1) as eluent. Compound **5** was isolated from the reaction mixture in 21% yield (89.3 mg).  $^1\text{H NMR}$  (400 MHz,  $\text{DMSO-}d_6$ )  $\delta$  7.60 (t,  $J = 8.0$  Hz, 2H, ArH), 7.47 (t,  $J = 7.6$  Hz, 1H, ArH), 7.37 (d,  $J = 7.6$  Hz, 2H, ArH), 7.17 (t,  $J = 8.0$  Hz, 2H, ArH), 7.10 (d,  $J = 7.6$  Hz, 1H, ArH), 6.92 (t,  $J = 7.6$  Hz, 1H, ArH), 6.85 (d,  $J = 2.8$  Hz, 1H, ArH), 6.68 (d,  $J = 7.6$  Hz, 1H, ArH), 6.47 (d,  $J = 2.8$  Hz, 1H, ArH), 3.99 (s, 1H, CH), 1.60 (s, 3H,  $\text{CH}_3$ ), 1.24 (s, 9H,  $\text{CH}_3$ ), 0.95 (s, 9H,  $\text{CH}_3$ ).  $^{13}\text{C NMR}$  (100 MHz,  $\text{DMSO-}d_6$ )  $\delta$  185.5, 174.3, 147.2, 146.1, 145.2, 144.1, 142.2, 134.6, 130.2, 128.8, 128.5, 126.9, 126.1, 125.8, 121.9, 108.7, 52.1, 43.6, 35.0, 34.6, 29.6, 29.3, 23.0. HRMS (ESI)  $m/z$ : calcd for  $\text{C}_{29}\text{H}_{34}\text{NO}_2^+$  ( $[\text{M}+\text{H}]^+$ ), 428.2584; found, 428.2580.

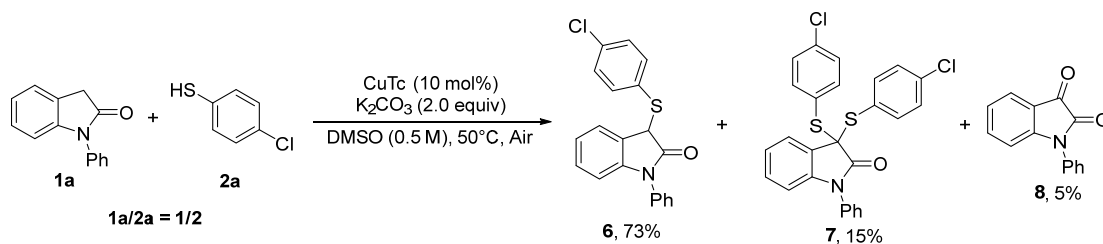

In a 10-mL reaction vial, equipped with a magnetic stirring bar, 1-phenylindolin-2-one (**1a**, 1.0 mmol, 209 mg), 4-chlorobenzenethiol (**2a**, 2.0 mmol, 288 mg),  $\text{K}_2\text{CO}_3$  (2.0 mmol, 276.4 mg)

and CuTc (10 mol%, 16.2 mg) were added to DMSO (2.0 mL). Then the vial was placed in a pre-heated metal block at 50 °C in the presence of ambient air. The reaction was monitored by TLC. After completion of the reaction, the mixture was quenched with a saturated aqueous solution of NH<sub>4</sub>Cl (15 mL) and extracted with ethyl acetate (2×20 mL). After drying with anhydrous Na<sub>2</sub>SO<sub>4</sub>, the organic layer was concentrated under reduced pressure and the residue was purified by column chromatography on silica gel (200–300 mesh) using petroleum/ethyl acetate (20/1–10/1) as eluent. Compound **6-8** were isolated from the reaction mixture.

### **3-((4-Chlorophenyl)thio)-1-phenylindolin-2-one (6):**

The title compound was isolated by column chromatography (eluent: petroleum ether /EtOAc = 6/1) as an orange solid in 73% yield (256.5 mg). <sup>1</sup>H NMR (400 MHz, DMSO-*d*<sub>6</sub>) δ 7.54 (t, *J* = 7.6 Hz, 2H), 7.49 (d, *J* = 6.4 Hz, 1H), 7.45 (t, *J* = 7.2 Hz, 1H), 7.36-7.30 (m, 4H, ArH), 7.22 (t, *J* = 7.6 Hz, 1H, ArH), 7.15 (d, *J* = 8.0 Hz, 3H, ArH), 6.58 (d, *J* = 8.0 Hz, 1H, ArH), 5.31 (s, 1H, CH). <sup>13</sup>C NMR (100 MHz, DMSO-*d*<sub>6</sub>) δ 173.9, 144.7, 136.1, 135.1, 134.8, 130.9, 130.8, 130.3, 130.0, 129.4, 127.6, 126.9, 126.5, 124.3, 110.1, 49.3.

### **3,3-Bis((4-chlorophenyl)thio)-1-phenylindolin-2-one (7):**

The title compound was isolated by silica-gel column chromatography (eluent: petroleum ether /EtOAc =40/1, v/v) as a white solid in 15% yield (74.3 mg). <sup>1</sup>H NMR (400 MHz, DMSO-*d*<sub>6</sub>) δ 7.52 (t, *J* = 8.0 Hz, 2H, ArH), 7.45 (t, *J* = 7.6 Hz, 1H, ArH), 7.39 (d, *J* = 8.64 Hz, 4H, ArH), 7.31 (t, *J* = 8.8 Hz, 5H, ArH), 7.20 (t, *J* = 7.6 Hz, 1H, ArH), 7.12 (t, *J* = 7.6 Hz, 1H, ArH), 6.92 (d, *J* = 7.2 Hz, 2H, ArH), 6.46 (d, *J* = 8.0 Hz, 1H, ArH). <sup>13</sup>C NMR (100 MHz, DMSO-*d*<sub>6</sub>) δ 171.7, 142.4, 138.3, 136.0, 133.7, 130.8, 130.3, 129.5, 129.1, 128.0, 126.9, 126.6, 126.0, 124.0, 109.7, 62.8.

### **1-Phenylindoline-2,3-dione (8):**

The title compound was isolated by silica-gel column chromatography (eluent: petroleum ether /EtOAc =2/1, v/v) as an orange solid in 5% yield (11.3 mg). <sup>1</sup>H NMR (400 MHz, DMSO-*d*<sub>6</sub>) δ 7.70 (d, *J* = 7.2 Hz, 1H, ArH), 7.65 (t, *J* = 7.6 Hz, 3H, ArH), 7.53 (d, *J* = 7.6 Hz, 3H, ArH), 7.23 (t, *J* = 7.6 Hz, 1H, ArH), 6.86 (d, *J* = 8.0 Hz, 1H, ArH). <sup>13</sup>C NMR (100 MHz, DMSO-*d*<sub>6</sub>) δ 183.2, 157.9, 151.7, 138.5, 133.8, 130.2, 128.9, 127.0, 125.2, 124.1, 118.1, 111.2.

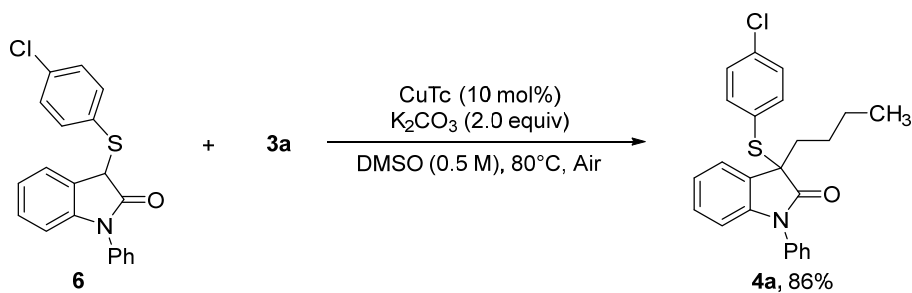

In a 10-mL reaction vial, equipped with a magnetic stirring bar, 1-phenylindolin-2-one (**6**, 0.5 mmol, 176 mg), butyl bromide (**3a**, 1.0 mmol, 137 mg),  $\text{K}_2\text{CO}_3$  (1.0 mmol, 138 mg) and CuTc (10 mol%, 8.1 mg) were added to DMSO (2.0 mL). Then the vial was placed in a pre-heated metal block at 80 °C in the presence of ambient air. The reaction was monitored by TLC. After completion of the reaction, the mixture was quenched with a saturated aqueous solution of  $\text{NH}_4\text{Cl}$  (15 mL) and extracted with ethyl acetate (2×20 mL). After drying with anhydrous  $\text{Na}_2\text{SO}_4$ , the organic layer was concentrated under reduced pressure and the residue was purified by column chromatography on silica gel (200–300 mesh) using petroleum/ethyl acetate (20/1–10/1) as eluent. Product **4a** was obtained in 86% yield (175.1 mg).

## 5. Characterization data for C3-alkylated 3-thioxyindolin-2-one (4)

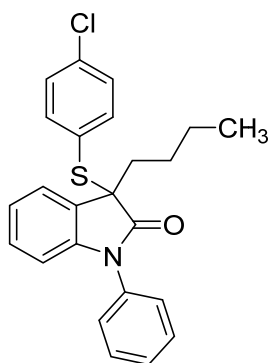

### 3-Butyl-3-((4-chlorophenyl)thio)-1-phenylindolin-2-one (4a):

The title compound was isolated by silica-gel column chromatography (eluent: petroleum ether /EtOAc =40/1, v/v) as a yellowish oily liquid in 82% yield (334.9 mg).  $^1\text{H}$  NMR (400 MHz,  $\text{DMSO-}d_6$ )  $\delta$  7.59-7.54 (m, 1H, ArH), 7.51 (t,  $J = 8.0$  Hz, 2H, ArH), 7.43 (t,  $J = 7.6$  Hz, 1H, ArH), 7.29 (d,  $J = 8.4$  Hz, 2H, ArH), 7.22-7.18 (m, 2H, ArH), 7.10 (d,  $J = 8.4$  Hz, 1H, ArH), 6.97 (d,  $J = 7.6$  Hz, 2H, ArH), 6.53-6.48 (m, 1H, ArH), 2.24-2.09 (m, 2H,  $\text{CH}_2$ ), 1.29-1.20 (m, 2H,  $\text{CH}_2$ ), 1.15-1.02 (m, 2H,  $\text{CH}_2$ ), 0.79 (t,  $J = 7.2$  Hz, 3H,  $\text{CH}_3$ ).  $^{13}\text{C}$  NMR (100 MHz,  $\text{DMSO-}$

*d*<sub>6</sub>)  $\delta$  174.8, 143.2, 138.1, 135.5, 134.1, 130.1, 129.6, 129.1, 129.1, 128.7, 128.4, 126.6, 125.0, 123.8, 109.3, 59.3, 34.8, 27.1, 22.5, 14.1. HRMS (ESI) *m/z*: calcd for C<sub>24</sub>H<sub>23</sub>ClNOS<sup>+</sup> ([M+H]<sup>+</sup>), 408.1183; found, 408.1189.

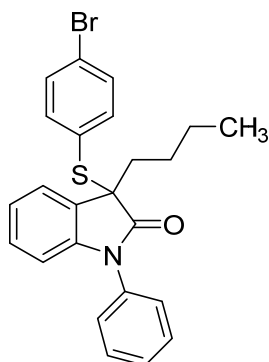

### 3-((4-Bromophenyl)thio)-3-butyl-1-phenylindolin-2-one (4b):

The title compound was isolated by silica-gel column chromatography (eluent: petroleum ether /EtOAc =40/1, v/v) as a yellowish oily liquid in 83% yield (376.1 mg). <sup>1</sup>H NMR (400 MHz, DMSO-*d*<sub>6</sub>)  $\delta$  7.58-7.54 (m, 1H, ArH), 7.51 (t, *J* = 7.6 Hz, 2H, ArH), 7.43 (t, *J* = 8.4 Hz, 3H, ArH), 7.23-7.17 (m, 2H, ArH), 7.03 (d, *J* = 8.4 Hz, 2H, ArH), 6.97 (d, *J* = 7.2 Hz, 2H, ArH), 6.53-6.48 (m, 1H, ArH), 2.24-2.09 (m, 2H, CH<sub>2</sub>), 1.29-1.20 (m, 2H, CH<sub>2</sub>), 1.16-1.00 (m, 2H, CH<sub>2</sub>), 0.79 (t, *J* = 7.2 Hz, 3H, CH<sub>3</sub>). <sup>13</sup>C NMR (100 MHz, DMSO-*d*<sub>6</sub>)  $\delta$  174.8, 143.2, 138.3, 134.1, 132.1, 130.1, 129.6, 129.1, 128.9, 128.7, 126.6, 125.0, 124.3, 123.8, 109.3, 59.3, 34.8, 27.1, 22.5, 14.1. HRMS (ESI) *m/z*: calcd for C<sub>24</sub>H<sub>22</sub>BrNNaOS<sup>+</sup> ([M+Na]<sup>+</sup>), 474.0498; found, 474.0494.

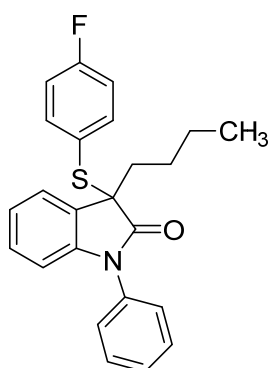

### 3-Butyl-3-((4-fluorophenyl)thio)-1-phenylindolin-2-one (4c):

The title compound was isolated by silica-gel column chromatography (eluent: petroleum ether /EtOAc =40/1, v/v) as a yellowish oily liquid in 73% yield (285.2 mg). <sup>1</sup>H NMR (400 MHz, DMSO-*d*<sub>6</sub>)  $\delta$  7.58-7.55 (m, 1H, ArH), 7.51 (t, *J* = 7.6 Hz, 2H, ArH), 7.42 (t, *J* = 7.2 Hz, 1H,

ArH), 7.22-7.16 (m, 2H, ArH), 7.15-7.12 (m, 2H, ArH), 7.07 (t,  $J = 8.8$  Hz, 2H, ArH), 6.98 (d,  $J = 7.6$  Hz, 2H, ArH), 6.51-6.47 (m, 1H, ArH), 2.24-2.09 (m, 2H, CH<sub>2</sub>), 1.27-1.20 (m, 2H, CH<sub>2</sub>), 1.14-1.01 (m, 2H, CH<sub>2</sub>), 0.79 (t,  $J = 7.2$  Hz, 3H, CH<sub>3</sub>). <sup>13</sup>C NMR (100 MHz, DMSO-*d*<sub>6</sub>)  $\delta$  174.9, 163.6 (d,  $J_{C-F} = 248.2$  Hz), 143.2, 138.9 (d,  $J_{C-F} = 9.0$  Hz), 134.2, 130.1, 129.4, 129.2, 128.6, 126.6, 125.2 (d,  $J_{C-F} = 3.0$  Hz), 125.0, 123.7, 116.2 (d,  $J_{C-F} = 19.1$  Hz), 109.2, 59.4, 34.7, 27.1, 22.5, 14.1. <sup>19</sup>F NMR (376 MHz, DMSO-*d*<sub>6</sub>)  $\delta$  -111.0. HRMS (ESI)  $m/z$ : calcd for C<sub>24</sub>H<sub>23</sub>FNOS<sup>+</sup> ([M+H]<sup>+</sup>), 392.1479; found, 392.1485.

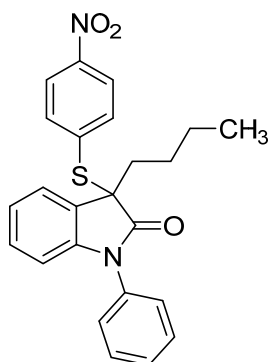

### 3-Butyl-3-((4-nitrophenyl)thio)-1-phenylindolin-2-one (4d):

The title compound was isolated by silica-gel column chromatography (eluent: petroleum ether /EtOAc =40/1, v/v) as a yellowish oily liquid in 74% yield (309.9 mg). <sup>1</sup>H NMR (400 MHz, CDCl<sub>3</sub>)  $\delta$  8.18 (d,  $J = 9.2$  Hz, 2H, ArH), 7.66 (d,  $J = 8.8$  Hz, 2H, ArH), 7.53 (t,  $J = 7.6$  Hz, 2H, ArH), 7.43 (t,  $J = 7.2$  Hz, 1H, ArH), 7.40-7.37 (m, 2H, ArH), 7.33-7.28 (m, 2H, ArH), 7.22-7.18 (m, 1H, ArH), 6.93 (d,  $J = 8.0$  Hz, 1H, ArH), 2.54-2.47 (m, 1H, CH<sub>2</sub>), 2.31-2.23 (m, 1H, CH<sub>2</sub>), 1.38-1.24 (m, 3H, CH<sub>2</sub>), 1.03-0.95 (m, 1H, CH<sub>2</sub>), 0.85 (t,  $J = 7.2$  Hz, 3H, CH<sub>3</sub>). <sup>13</sup>C NMR (100 MHz, CDCl<sub>3</sub>)  $\delta$  176.9, 147.7, 147.1, 136.5, 134.2, 130.8, 129.7, 128.7, 128.4, 128.1, 126.6, 125.0, 123.7, 123.5, 110.1, 56.9, 38.5, 26.6, 22.8, 13.8. HRMS (ESI)  $m/z$ : calcd for C<sub>24</sub>H<sub>23</sub>N<sub>2</sub>O<sub>3</sub>S<sup>+</sup> ([M+H]<sup>+</sup>), 419.1424; found, 419.1419.

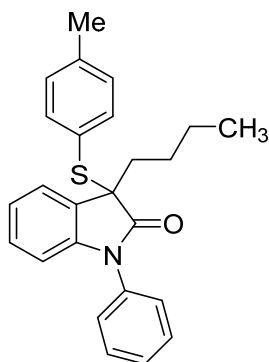



### 3-Butyl-1-phenyl-3-(p-tolylthio)indolin-2-one (4e):

The title compound was isolated by silica-gel column chromatography (eluent: petroleum ether /EtOAc =40/1, v/v) as a yellow oily liquid in 67% yield (258.9 mg).  $^1\text{H}$  NMR (400 MHz, DMSO- $d_6$ )  $\delta$  7.56-7.52 (m, 1H, ArH), 7.48 (t,  $J$  = 8.0 Hz, 2H, ArH), 7.41 (t,  $J$  = 7.2 Hz, 1H, ArH), 7.20-7.15 (m, 2H, ArH), 6.98 (q,  $J$  = 9.6 Hz, 4H, ArH), 6.89 (d,  $J$  = 7.2 Hz, 2H, ArH), 6.47-6.43 (m, 1H, ArH), 2.24 (s, 3H, CH<sub>3</sub>), 2.18-2.07 (m, 2H, CH<sub>2</sub>), 1.23 (t,  $J$  = 7.2 Hz, 2H, CH<sub>2</sub>), 1.14-1.01 (m, 2H, CH<sub>2</sub>), 0.79 (t,  $J$  = 7.2 Hz, 3H, CH<sub>3</sub>).  $^{13}\text{C}$  NMR (100 MHz, CDCl<sub>3</sub>)  $\delta$  175.6, 143.4, 139.7, 136.5, 134.2, 130.1, 129.4, 129.1, 128.3, 128.0, 126.5, 124.4, 123.1, 109.1, 59.5, 35.0, 27.1, 22.8, 21.2, 13.8. HRMS (ESI)  $m/z$ : calcd for C<sub>25</sub>H<sub>26</sub>NOS<sup>+</sup> ([M+H]<sup>+</sup>), 388.1730; found, 388.1746.

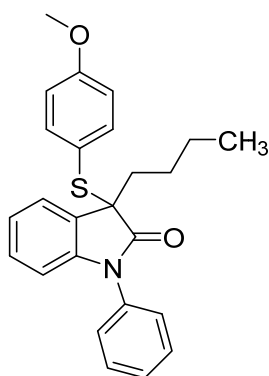

### 3-Butyl-3-((4-methoxyphenyl)thio)-1-phenylindolin-2-one (4f):

The title compound was isolated by silica-gel column chromatography (eluent: petroleum ether /EtOAc =10/1, v/v) as a colorless oil in 65% yield (261.4 mg).  $^1\text{H}$  NMR (400 MHz, CDCl<sub>3</sub>)  $\delta$  7.46 (d, 1H, ArH,  $J$  = 7.2 Hz), 7.39 (t, 2H, ArH,  $J$  = 7.6 Hz), 7.31 (t, 1H, ArH,  $J$  = 7.2 Hz), 7.15-7.19 (m, 4H, ArH), 7.93 (d, 2H, ArH,  $J$  = 8.0 Hz), 6.63 (d, 2H, ArH,  $J$  = 8.8 Hz), 6.48 (d, 1H, ArH,  $J$  = 7.6 Hz), 3.71 (s, 3H, CH<sub>3</sub>), 2.34-2.27 (m, 1H, CH<sub>2</sub>), 2.18-2.11 (m, 1H, CH<sub>2</sub>), 1.32-1.25 (m, 2H, CH<sub>2</sub>), 1.24-1.09 (m, 2H, CH<sub>2</sub>), 0.84 (t, 3H, CH<sub>3</sub>,  $J$  = 7.2 Hz).  $^{13}\text{C}$  NMR (100 MHz, CDCl<sub>3</sub>)  $\delta$  175.6, 160.8, 143.3, 138.1, 134.2, 130.1, 129.4, 128.3, 127.9, 126.4, 124.4, 123.1, 120.5, 113.9, 109.1, 59.7, 55.3, 34.9, 27.2, 22.8, 13.9. HRMS (ESI)  $m/z$ : calcd for C<sub>25</sub>H<sub>26</sub>NO<sub>2</sub>S<sup>+</sup> ([M+H]<sup>+</sup>), 404.1679; found, 404.1681.

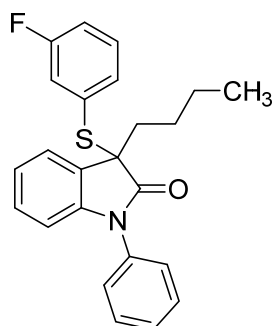

### 3-Butyl-3-((3-fluorophenyl)thio)-1-phenylindolin-2-one (4g):

The title compound was isolated by silica-gel column chromatography (eluent: petroleum ether /EtOAc =40/1, v/v) as a yellowish oily liquid in 75% yield (293.1 mg). <sup>1</sup>H NMR (400 MHz, DMSO-*d*<sub>6</sub>) δ 7.60-7.56 (m, 1H, ArH), 7.52 (t, *J* = 7.6 Hz, 2H, ArH), 7.43 (t, *J* = 7.6 Hz, 1H, ArH), 7.31-7.18 (m, 4H, ArH), 6.99 (t, *J* = 7.2 Hz, 3H, ArH), 6.83 (dt, *J* = 8.8, 2.0 Hz, 1H, ArH), 6.52-6.48 (m, 1H, ArH), 2.26-2.12 (m, 2H, CH<sub>2</sub>), 1.28-1.21 (m, 2H, CH<sub>2</sub>), 1.18-1.05 (m, 2H, CH<sub>2</sub>), 0.79 (t, *J* = 7.2 Hz, 3H, CH<sub>3</sub>). <sup>13</sup>C NMR (100 MHz, DMSO-*d*<sub>6</sub>) δ 174.8, 161.7 (d, *J*<sub>C-F</sub> = 246.2 Hz), 143.2, 134.1, 132.5 (d, *J*<sub>C-F</sub> = 2.0 Hz), 131.6 (d, *J*<sub>C-F</sub> = 8.0 Hz), 130.8 (d, *J*<sub>C-F</sub> = 8.0 Hz), 130.1, 129.5, 129.1, 128.7, 126.6, 125.1, 123.8, 122.5 (d, *J*<sub>C-F</sub> = 21.1 Hz), 117.2 (d, *J*<sub>C-F</sub> = 20.1 Hz), 109.2, 59.5, 34.9, 27.1, 22.5, 14.1. <sup>19</sup>F NMR (376 MHz, DMSO-*d*<sub>6</sub>) δ -112.5. HRMS (ESI) *m/z*: calcd for C<sub>24</sub>H<sub>23</sub>FNOS<sup>+</sup> ([M+H]<sup>+</sup>), 392.1479; found, 392.1488.

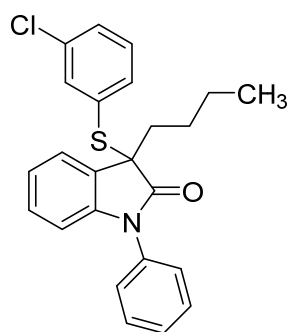

### 3-Butyl-3-((3-chlorophenyl)thio)-1-phenylindolin-2-one (4h):

The title compound was isolated by silica-gel column chromatography (eluent: petroleum ether /EtOAc =40/1, v/v) as a yellowish oily liquid in 79% yield (322.1 mg). <sup>1</sup>H NMR (400 MHz, CDCl<sub>3</sub>) δ 7.47 (d, *J* = 7.2 Hz, 1H, ArH), 7.43 (t, *J* = 8.0 Hz, 2H, ArH), 7.34 (t, *J* = 7.2 Hz, 1H, ArH), 7.24-7.22 (m, 1H, ArH), 7.18-7.06 (m, 4H, ArH), 7.03 (t, *J* = 8.0 Hz, 1H, ArH), 6.96 (d, *J* = 7.2 Hz, 2H, ArH), 6.51 (d, *J* = 7.2 Hz, 1H, ArH), 2.35-2.28 (m, 1H, CH<sub>2</sub>), 2.20-2.12 (m, 1H, CH<sub>2</sub>), 1.38-1.21 (m, 3H, CH<sub>2</sub>), 1.20-1.11 (m, 1H, CH<sub>2</sub>), 0.84 (t, *J* = 7.2 Hz, 3H, CH<sub>3</sub>). <sup>13</sup>C NMR (100 MHz, CDCl<sub>3</sub>) δ 175.3, 143.3, 135.9, 134.7, 134.0, 133.8, 131.5, 129.6, 129.4, 129.4, 128.7,

128.1, 126.4, 124.4, 123.3, 109.3, 109.1, 59.7, 35.1, 27.1, 22.7, 13.9. HRMS (ESI)  $m/z$ : calcd for  $C_{24}H_{23}ClNOS^+$  ( $[M+H]^+$ ), 408.1183; found, 408.1199.

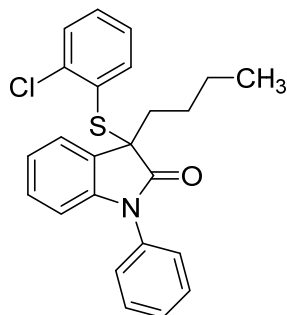

### 3-Butyl-3-((2-chlorophenyl)thio)-1-phenylindolin-2-one (4i):

The title compound was isolated by silica-gel column chromatography (eluent: petroleum ether /EtOAc =40/1, v/v) as a yellowish oily liquid in 78% yield (317.6 mg).  $^1H$  NMR (400 MHz,  $CDCl_3$ )  $\delta$  7.48-7.40 (m, 4H, ArH), 7.37 (t,  $J = 7.2$  Hz, 1H, ArH), 7.30 (d,  $J = 8.0$  Hz, 1H, ArH), 7.20-7.13 (m, 3H, ArH), 7.12-7.01 (m, 3H, ArH), 6.57 (d,  $J = 7.2$  Hz, 1H, ArH), 2.36-2.20 (m, 2H,  $CH_2$ ), 1.33-1.25 (m, 2H,  $CH_2$ ), 1.22-1.13 (m, 1H,  $CH_2$ ), 1.12-1.03 (m, 1H,  $CH_2$ ), 0.83 (t,  $J = 7.2$  Hz, 3H,  $CH_3$ ).  $^{13}C$  NMR (100 MHz,  $CDCl_3$ )  $\delta$  175.4, 143.2, 140.3, 138.7, 134.3, 130.7, 129.8, 129.6, 129.3, 128.7, 128.0, 126.5, 126.3, 125.0, 123.0, 109.1, 109.0, 59.3, 35.6, 27.0, 22.7, 13.8. HRMS (ESI)  $m/z$ : calcd for  $C_{24}H_{23}ClNOS^+$  ( $[M+H]^+$ ), 408.1183; found, 408.1195.

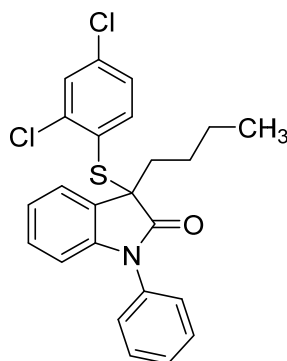

### 3-Butyl-3-((2,4-dichlorophenyl)thio)-1-phenylindolin-2-one (4j):

The title compound was isolated by silica-gel column chromatography (eluent: petroleum ether /EtOAc =40/1, v/v) as a yellowish oily liquid in 85% yield (375.4 mg).  $^1H$  NMR (400 MHz,  $CDCl_3$ )  $\delta$  7.48 (t,  $J = 8.0$  Hz, 2H, ArH), 7.43 (d,  $J = 6.4$  Hz, 1H, ArH), 7.40-7.32 (m, 3H, ArH), 7.18-7.07 (m, 4H, ArH), 7.02 (dd,  $J_1 = 8.4$ ,  $J_2 = 2.4$  Hz, 1H, ArH), 6.63 (d,  $J = 7.6$  Hz, 1H, ArH), 2.33-2.18 (m, 2H,  $CH_2$ ), 1.32-1.24 (m, 2H,  $CH_2$ ), 1.22-1.14 (m, 1H,  $CH_2$ ), 1.13-1.04 (m, 1H,  $CH_2$ ), 0.82 (t,  $J = 7.6$  Hz, 3H,  $CH_3$ ).  $^{13}C$  NMR (100 MHz,  $CDCl_3$ )  $\delta$  175.1, 143.2, 141.2, 139.4,

136.2, 134.2, 129.7, 129.6, 129.0, 128.4, 128.1, 128.0, 126.9, 126.2, 124.9, 123.2, 109.3, 59.3, 35.5, 27.0, 22.7, 13.8. HRMS (ESI)  $m/z$ : calcd for  $C_{24}H_{22}Cl_2NOS^+$  ( $[M+H]^+$ ), 442.0794; found, 442.0808.

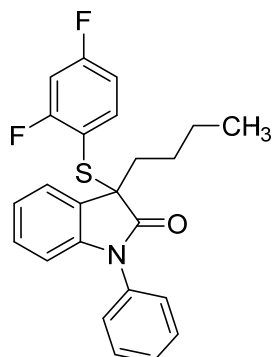

### 3-Butyl-3-((2,4-difluorophenyl)thio)-1-phenylindolin-2-one (4k):

The title compound was isolated by silica-gel column chromatography (eluent: petroleum ether /EtOAc =40/1, v/v) as a yellowish oily liquid in 72% yield (294.6 mg).  $^1H$  NMR (400 MHz,  $CDCl_3$ )  $\delta$  7.46 (q,  $J = 8.0, 7.6$  Hz, 3H, ArH), 7.39-7.31 (m, 2H, ArH), 7.15-7.08 (m, 4H, ArH), 6.73-6.66 (m, 2H, ArH), 6.63-6.56 (m, 1H, ArH), 2.31-2.16 (m, 2H,  $CH_2$ ), 1.34-1.26 (m, 2H,  $CH_2$ ), 1.20-1.03 (m, 2H,  $CH_2$ ), 0.83 (t,  $J = 7.6$  Hz, 3H,  $CH_3$ ).  $^{13}C$  NMR (100 MHz,  $CDCl_3$ )  $\delta$  175.4, 165.5 (dd,  $J_{1\ C-F} = 11.1$  Hz,  $J_{2\ C-F} = 6.0$  Hz) 163.0 (dd,  $J_{1\ C-F} = 11.1$  Hz,  $J_{2\ C-F} = 4.0$  Hz), 143.1, 140.4 (d,  $J_{C-F} = 10.0$  Hz), 134.2, 129.6, 128.8, 128.7, 128.1, 126.2, 124.7, 123.2, 112.6 (dd,  $J_{1\ C-F} = 19.1$  Hz,  $J_{2\ C-F} = 5.0$  Hz), 111.4 (dd,  $J_{1\ C-F} = 21.1$  Hz,  $J_{2\ C-F} = 4.0$  Hz), 109.1, 104.1 (dd,  $J_{1\ C-F} = 28.1$  Hz,  $J_{2\ C-F} = 26.1$  Hz), 58.9, 35.2, 27.1, 22.7, 13.8.  $^{19}F$  NMR (376 MHz,  $CDCl_3$ )  $\delta$  -98.9, -105.6. HRMS (ESI)  $m/z$ : calcd for  $C_{24}H_{22}F_2NOS^+$  ( $[M+H]^+$ ), 410.1385; found, 410.1402.

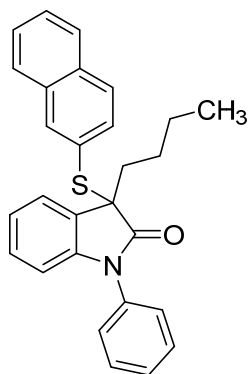

### 3-Butyl-3-(naphthalen-2-ylthio)-1-phenylindolin-2-one (4l):

The title compound was isolated by silica-gel column chromatography (eluent: petroleum ether

/EtOAc =40/1, v/v) as a yellowish oily liquid in 56% yield (236.7 mg). <sup>1</sup>H NMR (400 MHz, CDCl<sub>3</sub>) δ 7.72 (d, *J* = 8.0 Hz, 2H, ArH), 7.59 (d, *J* = 8.0 Hz, 1H, ArH), 7.55-7.52 (m, 2H, ArH), 7.47-7.38 (m, 2H, ArH), 7.23-7.13 (m, 5H, ArH), 7.06 (td, *J*<sub>1</sub> = 7.6, *J*<sub>2</sub> = 1.2 Hz, 1H, ArH), 6.65-6.62 (m, 2H, ArH), 6.33 (d, *J* = 7.6 Hz, 1H, ArH), 2.41-2.34 (m, 1H, CH<sub>2</sub>), 2.25-2.18 (m, 1H, CH<sub>2</sub>), 1.39-1.25 (m, 3H, CH<sub>2</sub>), 1.20-1.12 (m, 1H, CH<sub>2</sub>), 0.85 (t, *J* = 7.6 Hz, 3H, CH<sub>3</sub>). <sup>13</sup>C NMR (100 MHz, CDCl<sub>3</sub>) δ 175.6, 143.4, 136.6, 134.0, 133.3, 133.1, 132.8, 130.0, 129.3, 128.5, 128.1, 127.9, 127.9, 127.7, 127.5, 127.0, 126.3, 126.2, 124.5, 123.1, 109.1, 59.8, 35.1, 27.2, 22.8, 13.9. HRMS (ESI) *m/z*: calcd for C<sub>28</sub>H<sub>26</sub>NOS<sup>+</sup> ([M+H]<sup>+</sup>), 424.1730; found, 424.1729.

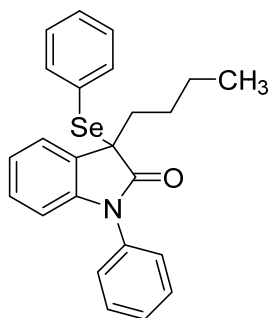

### 3-Butyl-1-phenyl-3-(phenylselanyl)indolin-2-one (4m):

The title compound was isolated by silica-gel column chromatography (eluent: petroleum ether /EtOAc =40/1, v/v) as a yellowish oily liquid in 81% yield (339.9 mg). <sup>1</sup>H NMR (400 MHz, CDCl<sub>3</sub>) δ 7.42-7.36 (m, 3H, ArH), 7.28 (m, 4H, ArH), 7.12-7.05 (m, 4H, ArH), 6.90 (d, *J* = 7.2 Hz, 2H, ArH), 6.47 (dd, *J*<sub>1</sub> = 6.8, *J*<sub>2</sub> = 2.0 Hz, 1H, ArH), 2.42-2.21 (m, 2H, CH<sub>2</sub>), 1.35-1.13 (m, 4H, CH<sub>2</sub>), 0.83 (t, *J* = 7.2 Hz, 3H, CH<sub>3</sub>). <sup>13</sup>C NMR (100 MHz, CDCl<sub>3</sub>) δ 176.1, 143.0, 137.6, 134.3, 130.2, 129.3, 129.3, 128.5, 128.1, 127.9, 126.4, 126.0, 124.4, 123.0, 109.1, 53.8, 34.5, 27.8, 22.7, 13.9. HRMS (ESI) *m/z*: calcd for C<sub>24</sub>H<sub>24</sub>NOSe<sup>+</sup> ([M+H]<sup>+</sup>), 422.1018; found, 422.1030.

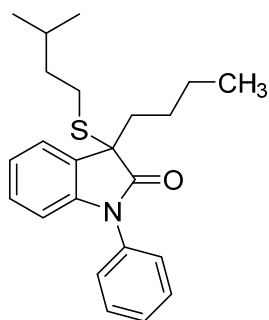

### 3-Butyl-3-(isopentylthio)-1-phenylindolin-2-one (4n):

The title compound was isolated by silica-gel column chromatography (eluent: petroleum ether

/EtOAc =40/1, v/v) as a colorless oil in 43% yield (157.1 mg).  $^1\text{H}$  NMR (400 MHz,  $\text{CDCl}_3$ )  $\delta$  7.43 (t, 2H, ArH,  $J = 7.6$  Hz), 7.32-7.28 (m, 4H, ArH), 7.12 (t, 1H, ArH,  $J = 7.6$  Hz), 7.04 (t, 1H, ArH,  $J = 7.6$  Hz), 6.73 (d, 1H, ArH,  $J = 7.6$  Hz), 2.49-2.43 (m, 1H,  $\text{CH}_2$ ), 2.38-2.31 (m, 1H,  $\text{CH}_2$ ), 2.20-2.13 (m, 1H,  $\text{CH}_2$ ), 2.03-1.95 (m, 1H,  $\text{CH}_2$ ), 1.51-1.44 (m, 1H, CH), 1.26-1.16 (m, 4H,  $\text{CH}_2$ ), 1.14-1.01 (m, 2H,  $\text{CH}_2$ ), 0.75-0.67 (m, 9H,  $\text{CH}_3$ ).  $^{13}\text{C}$  NMR (100 MHz,  $\text{CDCl}_3$ )  $\delta$  176.7, 143.2, 134.5, 129.9, 129.6, 128.6, 128.1, 126.5, 124.2, 123.4, 109.3, 54.5, 37.9, 36.2, 27.4, 26.8, 26.7, 22.7, 22.3, 22.1, 13.8. HRMS (ESI)  $m/z$ : calcd for  $\text{C}_{23}\text{H}_{30}\text{NOS}^+$  ( $[\text{M}+\text{H}]^+$ ), 368.2043; found, 368.2045.

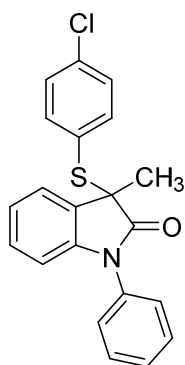

### 3-((4-Chlorophenyl)thio)-3-methyl-1-phenylindolin-2-one (4o):

The title compound was isolated by silica-gel column chromatography (eluent: petroleum ether /EtOAc =40/1, v/v) as a yellowish solid in 81% yield (295.6 mg). Mp 100-102°C.  $^1\text{H}$  NMR (400 MHz,  $\text{CDCl}_3$ )  $\delta$  7.53-7.49 (m, 1H, ArH), 7.43 (t,  $J = 8.0$  Hz, 2H, ArH), 7.34 (t,  $J = 7.2$  Hz, 1H, ArH), 7.17-7.13 (m, 2H, ArH), 7.10 (s, 4H, ArH), 6.91 (d,  $J = 8.0$  Hz, 2H, ArH), 6.55-6.51 (m, 1H, ArH), 1.82 (s, 3H,  $\text{CH}_3$ ).  $^{13}\text{C}$  NMR (100 MHz,  $\text{CDCl}_3$ )  $\delta$  175.8, 142.6, 137.7, 136.2, 133.9, 131.3, 129.5, 128.8, 128.7, 128.5, 128.1, 126.2, 124.1, 123.4, 109.4, 55.2, 21.5. HRMS (ESI)  $m/z$ : calcd for  $\text{C}_{21}\text{H}_{17}\text{ClNOS}^+$  ( $[\text{M}+\text{H}]^+$ ), 366.0714; found, 366.0726.

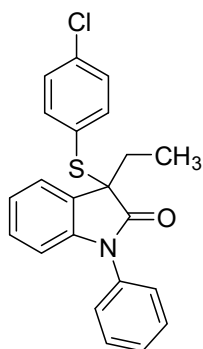

### 3-((4-Chlorophenyl)thio)-3-ethyl-1-phenylindolin-2-one (4p):

The title compound was isolated by silica-gel column chromatography (eluent: petroleum ether /EtOAc =40/1, v/v) as a yellowish oily liquid in 84% yield (318.8 mg). <sup>1</sup>H NMR (400 MHz, CDCl<sub>3</sub>) δ 7.49-7.41 (m, 3H, ArH), 7.34 (t, *J* = 7.6 Hz, 1H, ArH), 7.17-7.07 (m, 6H, ArH), 6.92 (d, *J* = 7.6 Hz, 2H, ArH), 6.52 (d, *J* = 8.4 Hz, 1H, ArH), 2.39-2.30 (m, 1H, CH<sub>2</sub>), 2.24-2.15 (m, 1H, CH<sub>2</sub>), 0.85 (t, *J* = 7.2 Hz, 3H, CH<sub>3</sub>). <sup>13</sup>C NMR (100 MHz, CDCl<sub>3</sub>) δ 175.1, 143.5, 137.9, 136.1, 134.0, 129.5, 129.2, 128.7, 128.6, 128.2, 128.1, 126.3, 124.4, 123.3, 109.3, 60.3, 28.7, 9.4. HRMS (ESI) *m/z*: calcd for C<sub>22</sub>H<sub>19</sub>ClNOS<sup>+</sup> ([M+H]<sup>+</sup>), 380.0870; found, 380.0865.

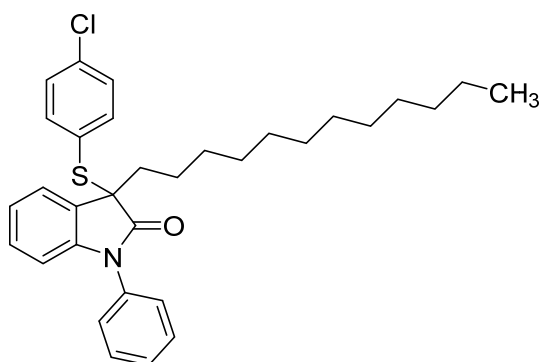

### 3-((4-Chlorophenyl)thio)-3-dodecyl-1-phenylindolin-2-one (4q):

The title compound was isolated by silica-gel column chromatography (eluent: petroleum ether /EtOAc =40/1, v/v) as a yellowish oily liquid in 64% yield (331.8 mg). <sup>1</sup>H NMR (400 MHz, CDCl<sub>3</sub>) δ 7.49-7.46 (m, 1H, ArH), 7.42 (t, *J* = 8.0 Hz, 2H, ArH), 7.33 (t, *J* = 7.2 Hz, 1H, ArH), 7.17-7.06 (m, 6H, ArH), 6.90 (d, *J* = 7.2 Hz, 2H, ArH), 6.54-6.48 (m, 1H, ArH), 2.33-2.26 (m, 1H, CH<sub>2</sub>), 2.18-2.11 (m, 1H, CH<sub>2</sub>), 1.30-1.16 (m, 20H, CH<sub>2</sub>), 0.87 (t, *J* = 7.2 Hz, 3H, CH<sub>3</sub>). <sup>13</sup>C NMR (100 MHz, CDCl<sub>3</sub>) δ 175.2, 143.3, 137.8, 136.1, 134.0, 129.7, 129.5, 128.6, 128.6, 128.2, 128.1, 126.2, 124.4, 123.2, 109.2, 59.6, 35.3, 31.9, 29.6(2), 29.5, 29.4, 29.3, 25.0, 22.7, 14.2. HRMS (ESI) *m/z*: calcd for C<sub>32</sub>H<sub>39</sub>ClNOS<sup>+</sup> ([M+H]<sup>+</sup>), 520.2435; found, 520.2430.

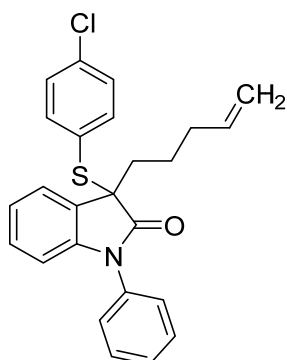

### 3-((4-Chlorophenyl)thio)-3-(pent-4-en-1-yl)-1-phenylindolin-2-one (4r):

The title compound was isolated by silica-gel column chromatography (eluent: petroleum ether /EtOAc =40/1, v/v) as a yellowish oily liquid in 83% yield (347.6 mg). <sup>1</sup>H NMR (400 MHz, CDCl<sub>3</sub>) δ 7.49-7.46 (m, 1H, ArH), 7.42 (t, *J* = 8.0 Hz, 2H, ArH), 7.33 (t, *J* = 7.2 Hz, 1H, ArH), 7.15-7.06 (m, 6H, ArH), 6.90 (d, *J* = 7.2 Hz, 2H, ArH), 6.53-6.49 (m, 1H, ArH), 5.75-5.64 (m, 1H, CH), 5.00-4.92 (m, 2H, CH<sub>2</sub>), 2.34-2.27 (m, 1H, CH<sub>2</sub>), 2.20-2.13 (m, 1H, CH<sub>2</sub>), 2.07-1.19 (m, 2H, CH<sub>2</sub>), 1.40-1.20 (m, 2H, CH<sub>2</sub>). <sup>13</sup>C NMR (100 MHz, CDCl<sub>3</sub>) δ 175.1, 143.3, 138.2, 137.9, 137.7, 136.1, 134.0, 129.5, 128.9, 128.7, 128.6, 128.1, 126.2, 124.4, 123.3, 115.3, 109.3, 59.5, 34.8, 33.6, 24.2. HRMS (ESI) *m/z*: calcd for C<sub>25</sub>H<sub>22</sub>ClNNaOS<sup>+</sup> ([M+Na]<sup>+</sup>), 442.1003; found, 442.0999.

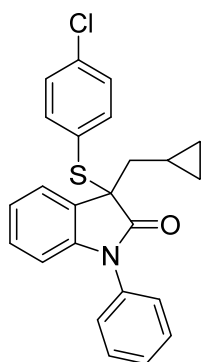

### 3-((4-Chlorophenyl)thio)-3-(cyclopropylmethyl)-1-phenylindolin-2-one (4s):

The title compound was isolated by silica-gel column chromatography (eluent: petroleum ether /EtOAc =40/1, v/v) as a yellowish oily liquid in 82% yield (332.2 mg). <sup>1</sup>H NMR (400 MHz, CDCl<sub>3</sub>) δ 7.54-7.49 (m, 1H, ArH), 7.43 (t, *J* = 8.0 Hz, 2H, ArH), 7.34 (t, *J* = 7.6 Hz, 1H, ArH), 7.17-7.07 (m, 6H, ArH), 6.93 (d, *J* = 7.2 Hz, 2H, ArH), 6.55-6.49 (m, 1H, ArH), 2.42 (dd, *J*<sub>1</sub> = 13.6 Hz, *J*<sub>2</sub> = 4.8 Hz, 1H, CH<sub>2</sub>), 1.95 (dd, *J*<sub>1</sub> = 14.0 Hz, *J*<sub>2</sub> = 9.2 Hz, 1H, CH<sub>2</sub>), 0.59-0.49 (m, 1H, CH), 0.32-0.25 (m, 3H, CH<sub>2</sub>), 0.10-0.03 (m, 1H, CH<sub>2</sub>). <sup>13</sup>C NMR (100 MHz, CDCl<sub>3</sub>) δ 175.4, 143.5, 137.8, 136.0, 134.2, 129.9, 129.6, 129.6, 128.7, 128.6, 128.1, 126.3, 124.7, 123.1, 109.2, 59.9, 40.1, 7.1, 4.5, 4.2. HRMS (ESI) *m/z*: calcd for C<sub>24</sub>H<sub>21</sub>ClNOS<sup>+</sup> ([M+H]<sup>+</sup>), 406.1027; found, 406.1024.



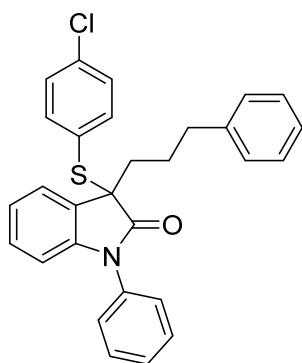

### 3-((4-Chlorophenyl)thio)-1-phenyl-3-(3-phenylpropyl)indolin-2-one (4t):

The title compound was isolated by silica-gel column chromatography (eluent: petroleum ether /EtOAc =40/1, v/v) as a yellowish solid in 90% yield (422.6 mg). Mp 128-129°C. <sup>1</sup>H NMR (400 MHz, CDCl<sub>3</sub>) δ 7.43-7.39 (m, 3H, ArH), 7.33 (t, *J* = 7.2 Hz, 1H, ArH), 7.24 (t, *J* = 7.6 Hz, 2H, ArH), 7.18-7.06 (m, 9H, ArH), 6.88 (d, *J* = 7.2 Hz, 2H, ArH), 6.53-6.47 (m, 1H, ArH), 2.68-2.52 (m, 2H, CH<sub>2</sub>), 2.40-2.32 (m, 1H, CH<sub>2</sub>), 2.23-2.15 (m, 1H, CH<sub>2</sub>), 1.63-1.43 (m, 2H, CH<sub>2</sub>). <sup>13</sup>C NMR (100 MHz, CDCl<sub>3</sub>) δ 175.1, 143.3, 141.4, 137.9, 136.2, 133.9, 129.5, 129.4, 128.8, 128.6, 128.4, 128.1, 128.0, 126.2, 126.0, 124.4, 123.3, 109.3, 59.4, 35.8, 34.9, 26.8. HRMS (ESI) *m/z*: calcd for C<sub>29</sub>H<sub>24</sub>ClNNaOS<sup>+</sup> ([M+Na]<sup>+</sup>), 492.1159; found, 492.1153.

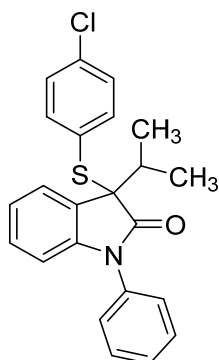

### 3-((4-Chlorophenyl)thio)-3-isopropyl-1-phenylindolin-2-one (4u):

The title compound was isolated by silica-gel column chromatography (eluent: petroleum ether /EtOAc =40/1, v/v) as a yellowish oily liquid in 45% yield (176.8 mg). <sup>1</sup>H NMR (400 MHz, CDCl<sub>3</sub>) δ 7.59-7.54 (m, 1H, ArH), 7.42 (t, *J* = 8.0 Hz, 2H, ArH), 7.34 (t, *J* = 7.6 Hz, 1H, ArH), 7.17-7.12 (m, 2H, ArH), 7.11-7.05 (m, 4H, ArH), 6.86 (d, *J* = 7.2 Hz, 2H, ArH), 6.51-6.46 (m, 1H, ArH), 2.70-2.59 (m, 1H, CH), 1.32 (d, *J* = 6.8 Hz, 3H, CH<sub>3</sub>), 0.96 (d, *J* = 6.4 Hz, 3H, CH<sub>3</sub>). <sup>13</sup>C NMR (100 MHz, CDCl<sub>3</sub>) δ 175.3, 143.5, 137.9, 135.9, 134.0, 129.5, 128.7, 128.6, 128.5, 128.4, 128.1, 126.3, 125.4, 123.0, 109.1, 64.2, 34.6, 18.3, 17.8. HRMS (ESI) *m/z*: calcd for

$C_{23}H_{21}ClNOS^+$  ( $[M+H]^+$ ), 394.1027; found, 394.1043.

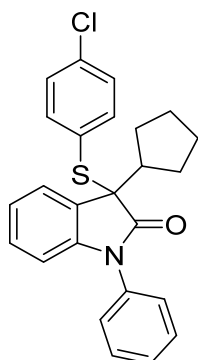

### 3-((4-Chlorophenyl)thio)-3-cyclopentyl-1-phenylindolin-2-one (4v):

The title compound was isolated by silica-gel column chromatography (eluent: petroleum ether /EtOAc =40/1, v/v) as a yellowish oily liquid in 48% yield (200.8 mg).  $^1H$  NMR (400 MHz,  $CDCl_3$ )  $\delta$  7.61-7.56 (m, 1H, ArH), 7.42 (t,  $J = 7.6$  Hz, 2H, ArH), 7.34 (t,  $J = 7.2$  Hz, 1H, ArH), 7.14-7.09 (m, 4H, ArH), 7.08-7.05 (m, 2H, ArH), 6.88 (d,  $J = 7.2$  Hz, 2H, ArH), 6.50-6.46 (m, 1H, ArH), 2.81-2.72 (m, 1H, CH), 2.02-1.94 (m, 1H,  $CH_2$ ), 1.84-1.74 (m, 2H,  $CH_2$ ), 1.66-1.54 (m, 4H,  $CH_2$ ), 1.40-1.33 (m, 1H,  $CH_2$ ).  $^{13}C$  NMR (100 MHz,  $CDCl_3$ )  $\delta$  175.2, 143.4, 137.7, 135.8, 134.0, 129.5, 129.3, 128.5, 128.1, 126.4, 125.3, 123.0, 109.1, 62.4, 45.8, 28.1, 27.8, 25.3, 25.1. HRMS (ESI)  $m/z$ : calcd for  $C_{25}H_{23}ClNOS^+$  ( $[M+H]^+$ ), 420.1183; found, 420.1190.

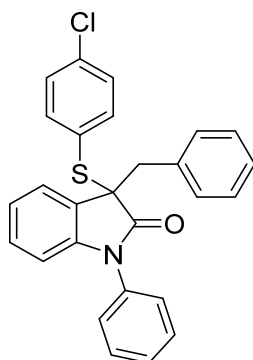

### 3-Benzyl-3-((4-chlorophenyl)thio)-1-phenylindolin-2-one (4w):

The title compound was isolated by silica-gel column chromatography (eluent: petroleum ether /EtOAc =40/1, v/v) as a White solid in 52% yield (228.9 mg). Mp 105-107°C.  $^1H$  NMR (400 MHz,  $CDCl_3$ )  $\delta$  7.54 (dd,  $J_1 = 7.2$  Hz,  $J_2 = 0.8$  Hz, 1H, ArH), 7.36-7.27 (m, 3H, ArH), 7.22-7.18 (m, 2H, ArH), 7.13-7.06 (m, 6H, ArH), 7.04-6.99 (m, 3H, ArH), 6.62-6.59 (m, 2H, ArH), 6.24 (d,  $J = 8.0$  Hz, 1H, ArH), 3.59 (d,  $J = 12.8$  Hz, 1H,  $CH_2$ ), 3.40 (d,  $J = 13.2$  Hz, 1H,  $CH_2$ ).  $^{13}C$  NMR (100 MHz,  $CDCl_3$ )  $\delta$  174.6, 143.3, 137.9, 136.1, 134.7, 133.8, 130.3(2), 129.5, 128.8,

128.7, 128.1, 127.9, 127.0, 126.3, 125.1, 122.9, 109.2, 109.0, 60.8, 41.6. HRMS (ESI)  $m/z$ : calcd for  $C_{27}H_{21}ClNOS^+$  ( $[M+H]^+$ ), 442.1027; found, 442.1038.

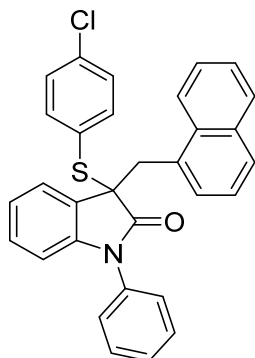

**3-((4-Chlorophenyl)thio)-3-(naphthalen-1-ylmethyl)-1-phenylindolin-2-one (4x):**

The title compound was isolated by silica-gel column chromatography (eluent: petroleum ether /EtOAc =40/1, v/v) as a white solid in 56% yield (275.1 mg). Mp 119-120°C.  $^1H$  NMR (400 MHz,  $CDCl_3$ )  $\delta$  8.16 (d,  $J = 8.4$  Hz, 1H, ArH), 7.73 (d,  $J = 8.0$  Hz, 1H, ArH), 7.64 (d,  $J = 7.6$  Hz, 1H, ArH), 7.46-7.37 (m, 3H, ArH), 7.33-7.23 (m, 5H, ArH), 7.17 (d,  $J = 8.4$  Hz, 2H, ArH), 7.08 (d,  $J = 8.8$  Hz, 2H, ArH), 6.94-6.88 (m, 2H, ArH), 6.53 (d,  $J = 7.2$  Hz, 2H, ArH), 6.18 (d,  $J = 8.8$  Hz, 1H, ArH), 4.10 (d,  $J = 14.0$  Hz, 1H,  $CH_2$ ), 3.96 (d,  $J = 14.0$  Hz, 1H,  $CH_2$ ).  $^{13}C$  NMR (100 MHz,  $CDCl_3$ )  $\delta$  175.1, 143.1, 137.9, 136.1, 133.8, 133.7, 132.1, 131.4, 129.5, 128.7(3), 128.5, 128.4, 128.2, 128.1, 126.2, 125.9, 125.5, 124.8, 124.7, 124.6, 122.6, 109.0, 108.9, 60.9, 37.1. HRMS (ESI)  $m/z$ : calcd for  $C_{31}H_{23}ClNOS^+$  ( $[M+H]^+$ ), 492.1183; found, 492.1182.

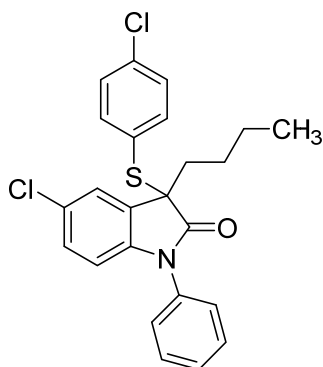

**3-Butyl-5-chloro-3-((4-chlorophenyl)thio)-1-phenylindolin-2-one (4y):**

The title compound was isolated by silica-gel column chromatography (eluent: petroleum ether /EtOAc =40/1, v/v) as a yellowish oily liquid in 79% yield (348.7 mg).  $^1H$  NMR (400 MHz,  $CDCl_3$ )  $\delta$  7.45-7.41 (m, 3H, ArH), 7.36 (t,  $J = 7.6$  Hz, 1H, ArH), 7.13-7.10 (m, 5H, ArH), 6.86 (d,  $J = 7.6$  Hz, 2H, ArH), 6.44 (d,  $J = 8.4$  Hz, 1H, ArH), 2.34-2.27 (m, 1H,  $CH_2$ ), 2.15-2.07 (m,

<sup>1</sup>H, CH<sub>2</sub>), 1.35-1.26 (m, 2H, CH<sub>2</sub>), 1.24-1.09 (m, 2H, CH<sub>2</sub>), 0.85 (t, *J* = 7.6 Hz, 3H, CH<sub>3</sub>). <sup>13</sup>C NMR (100 MHz, CDCl<sub>3</sub>) δ 174.7, 141.8, 137.9, 136.4, 133.6, 131.6, 129.6, 128.8, 128.6, 128.6, 128.3, 127.7, 126.1, 124.6, 110.3, 59.6, 35.0, 27.0, 22.7, 13.8. HRMS (ESI) *m/z*: calcd for C<sub>24</sub>H<sub>22</sub>Cl<sub>2</sub>NOS<sup>+</sup> ([M+H]<sup>+</sup>), 442.0794; found, 442.0794.

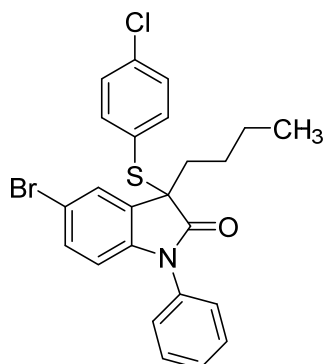

### 5-Bromo-3-butyl-3-((4-chlorophenyl)thio)-1-phenylindolin-2-one (4z):

The title compound was isolated by silica-gel column chromatography (eluent: petroleum ether /EtOAc =40/1, v/v) as a yellowish oily liquid in 84% yield (407.3 mg). <sup>1</sup>H NMR (400 MHz, CDCl<sub>3</sub>) δ 7.74 (d, *J* = 1.6 Hz, 1H, ArH), 7.46-7.41 (m, 3H, ArH), 7.36 (t, *J* = 7.6 Hz, 1H, ArH), 7.13 (s, 4H, ArH), 6.84 (d, *J* = 7.2 Hz, 2H, ArH), 6.30 (d, *J* = 8.4 Hz, 1H, ArH), 2.33-2.25 (m, 1H, CH<sub>2</sub>), 2.13-2.05 (m, 1H, CH<sub>2</sub>), 1.34-1.25 (m, 2H, CH<sub>2</sub>), 1.21-1.09 (m, 2H, CH<sub>2</sub>), 0.86 (t, *J* = 7.2 Hz, 3H, CH<sub>3</sub>). <sup>13</sup>C NMR (100 MHz, CDCl<sub>3</sub>) δ 173.4, 141.9, 136.8, 136.4, 135.3, 132.5, 132.0, 131.2, 128.6, 127.7, 127.3, 126.6, 126.3, 125.0, 110.2, 58.2, 34.0, 26.0, 21.7, 12.8. HRMS (ESI) *m/z*: calcd for C<sub>24</sub>H<sub>22</sub>BrClNOS<sup>+</sup> ([M+H]<sup>+</sup>), 486.0289; found, 486.0274.

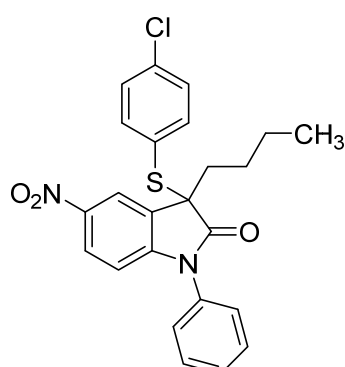

### 3-Butyl-3-((4-chlorophenyl)thio)-5-nitro-1-phenylindolin-2-one (4aa):

The title compound was isolated by silica-gel column chromatography (eluent: petroleum ether /EtOAc =40/1, v/v) as a yellowish oily liquid in 71% yield (321.2 mg). <sup>1</sup>H NMR (400 MHz, CDCl<sub>3</sub>) δ 8.37 (s, 1H, ArH), 8.11 (d, *J* = 8.8 Hz, 1H, ArH), 7.50-7.43 (m, 3H, ArH), 7.13 (s, 4H,

ArH), 6.87 (d,  $J = 6.4$  Hz, 2H, ArH), 6.60 (d,  $J = 8.8$  Hz, 1H, ArH), 2.39-2.33 (m, 1H, CH<sub>2</sub>), 2.24-2.17 (m, 1H, CH<sub>2</sub>), 1.34-1.30 (m, 2H, CH<sub>2</sub>), 1.22-1.09 (m, 2H, CH<sub>2</sub>), 0.86 (t,  $J = 6.8$  Hz, 3H, CH<sub>3</sub>). <sup>13</sup>C NMR (100 MHz, CDCl<sub>3</sub>)  $\delta$  174.3, 147.5, 142.8, 136.9, 135.7, 131.9, 129.9, 128.9, 128.0(2), 126.2, 125.1, 124.6, 119.2, 108.0, 58.1, 33.9, 26.0, 21.6, 12.7. HRMS (ESI)  $m/z$ : calcd for C<sub>24</sub>H<sub>22</sub>ClN<sub>2</sub>O<sub>3</sub>S<sup>+</sup> ([M+H]<sup>+</sup>), 453.1034; found, 453.1038.

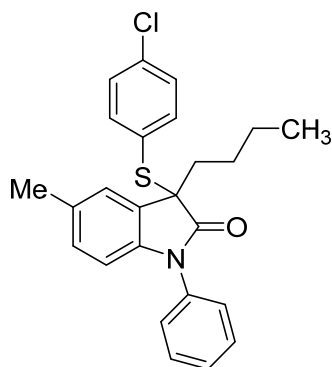

### 3-Butyl-3-((4-chlorophenyl)thio)-5-methyl-1-phenylindolin-2-one (4ab):

The title compound was isolated by silica-gel column chromatography (eluent: petroleum ether /EtOAc =40/1, v/v) as a yellowish oily liquid in 55% yield (231.2 mg). <sup>1</sup>H NMR (400 MHz, CDCl<sub>3</sub>)  $\delta$  7.42 (t,  $J = 7.6$  Hz, 2H, ArH), 7.33 (t,  $J = 7.6$  Hz, 1H, ArH), 7.28 (s, 1H, ArH), 7.10 (s, 4H, ArH), 6.94 (d,  $J = 8.4$  Hz, 1H, ArH), 6.90 (d,  $J = 8.4$  Hz, 2H, ArH), 6.43 (d,  $J = 8.0$  Hz, 1H, ArH), 2.41 (s, 3H, CH<sub>3</sub>), 2.32-2.25 (m, 1H, CH<sub>2</sub>), 2.19-2.08 (m, 1H, CH<sub>2</sub>), 1.32-1.26 (m, 2H, CH<sub>2</sub>), 1.24-1.09 (m, 2H, CH<sub>2</sub>), 0.84 (t,  $J = 7.2$  Hz, 3H, CH<sub>3</sub>). <sup>13</sup>C NMR (100 MHz, CDCl<sub>3</sub>)  $\delta$  174.1, 140.0, 136.8, 135.0, 133.2, 131.8, 128.6, 128.4, 128.0, 127.5, 127.3, 126.9, 125.1, 123.9, 108.0, 58.6, 34.1, 26.0, 21.7, 20.2, 12.8. HRMS (ESI)  $m/z$ : calcd for C<sub>25</sub>H<sub>25</sub>ClNOS<sup>+</sup> ([M+H]<sup>+</sup>), 422.1340; found, 422.1340.

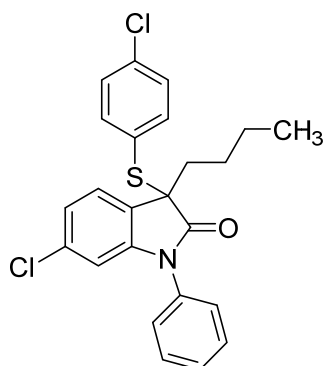

### 3-Butyl-6-chloro-3-((4-chlorophenyl)thio)-1-phenylindolin-2-one (4ac):

The title compound was isolated by silica-gel column chromatography (eluent: petroleum ether

/EtOAc =40/1, v/v) as a yellowish oily liquid in 82% yield (361.8 mg).  $^1\text{H}$  NMR (400 MHz,  $\text{CDCl}_3$ )  $\delta$  7.45 (t,  $J = 8.0$  Hz, 2H, ArH), 7.40-7.36 (m, 2H, ArH), 7.15-7.13 (m, 5H, ArH), 6.86 (d,  $J = 7.6$  Hz, 2H, ArH), 6.51 (s, 1H, ArH), 2.33-2.25 (m, 1H,  $\text{CH}_2$ ), 2.15-2.08 (m, 1H,  $\text{CH}_2$ ), 1.33-1.25 (m, 2H,  $\text{CH}_2$ ), 1.21-1.06 (m, 2H,  $\text{CH}_2$ ), 0.84 (t,  $J = 7.2$  Hz, 3H,  $\text{CH}_3$ ).  $^{13}\text{C}$  NMR (100 MHz,  $\text{CDCl}_3$ )  $\delta$  174.1, 143.3, 136.8, 135.3, 133.3, 132.4, 128.7, 127.7, 127.5, 127.1, 126.7, 125.1, 124.3, 122.2, 108.8, 58.2, 34.0, 26.0, 21.6, 12.7. HRMS (ESI)  $m/z$ : calcd for  $\text{C}_{24}\text{H}_{22}\text{Cl}_2\text{NOS}^+$  ( $[\text{M}+\text{H}]^+$ ), 442.0794; found, 442.0783.

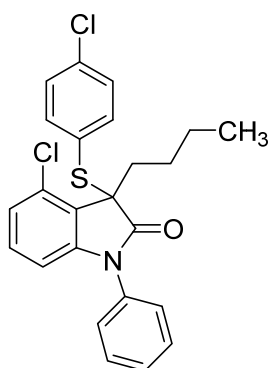

### 3-Butyl-4-chloro-3-((4-chlorophenyl)thio)-1-phenylindolin-2-one (4ad):

The title compound was isolated by silica-gel column chromatography (eluent: petroleum ether /EtOAc =40/1, v/v) as a yellowish oily liquid in 68% yield (299.3 mg).  $^1\text{H}$  NMR (400 MHz,  $\text{CDCl}_3$ )  $\delta$  7.45-7.41 (m, 2H, ArH), 7.38-7.34 (m, 1H, ArH), 7.13-7.05 (m, 6H, ArH), 6.80 (d,  $J = 7.6$  Hz, 2H, ArH), 6.36 (dd,  $J_1 = 6.4$  Hz,  $J_2 = 2.0$  Hz, 1H, ArH), 2.66-2.59 (m, 1H,  $\text{CH}_2$ ), 2.34-2.27 (m, 1H,  $\text{CH}_2$ ), 1.38-1.26 (m, 2H,  $\text{CH}_2$ ), 1.13-1.02 (m, 2H,  $\text{CH}_2$ ), 0.85 (t,  $J = 7.2$  Hz, 3H,  $\text{CH}_3$ ).  $^{13}\text{C}$  NMR (100 MHz,  $\text{CDCl}_3$ )  $\delta$  173.6, 143.9, 136.8, 135.2, 132.5, 130.5, 128.7, 128.5, 127.6, 127.4, 127.0, 125.3, 124.3, 123.3, 106.6, 59.9, 31.3, 26.6, 21.5, 12.7. HRMS (ESI)  $m/z$ : calcd for  $\text{C}_{24}\text{H}_{22}\text{Cl}_2\text{NOS}^+$  ( $[\text{M}+\text{H}]^+$ ), 442.0794; found, 442.0788.

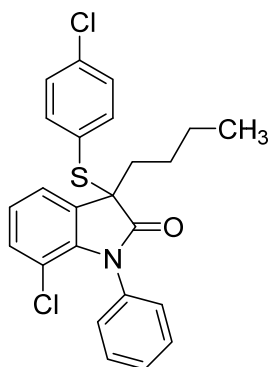

### 3-Butyl-7-chloro-3-((4-chlorophenyl)thio)-1-phenylindolin-2-one (4ae):

The title compound was isolated by silica-gel column chromatography (eluent: petroleum ether /EtOAc =40/1, v/v) as a yellowish oily liquid in 57% yield (252.5 mg). <sup>1</sup>H NMR (400 MHz, CDCl<sub>3</sub>) δ 7.41-7.38 (m, 2H, ArH), 7.37-7.32 (m, 3H, ArH), 7.20-7.17 (m, 2H, ArH), 7.15-7.07 (m, 5H, ArH), 6.27 (d, *J* = 7.2 Hz, 1H, ArH), 2.33-2.26 (m, 1H, CH<sub>2</sub>), 2.14-2.07 (m, 1H, CH<sub>2</sub>), 1.34-1.27 (m, 2H, CH<sub>2</sub>), 1.25-1.15 (m, 2H, CH<sub>2</sub>), 0.85 (t, *J* = 7.2 Hz, 3H, CH<sub>3</sub>). <sup>13</sup>C NMR (100 MHz, CDCl<sub>3</sub>) δ 174.9, 136.9, 135.4, 133.9, 131.7, 130.1, 127.8(2), 127.7, 127.6, 126.9, 126.8, 122.7, 121.8, 114.9, 58.4, 34.4, 25.9, 21.6, 12.7. HRMS (ESI) *m/z*: calcd for C<sub>24</sub>H<sub>22</sub>Cl<sub>2</sub>NOS<sup>+</sup> ([M+H]<sup>+</sup>), 442.0794; found, 442.0784.

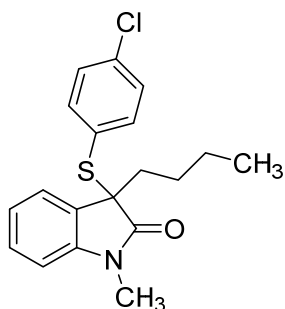

### **3-Butyl-3-((4-chlorophenyl)thio)-1-methylindolin-2-one (4af):**

The title compound was isolated by silica-gel column chromatography (eluent: petroleum ether /EtOAc =40/1, v/v) as a yellowish oily liquid in 84% yield (290.1 mg). <sup>1</sup>H NMR (400 MHz, CDCl<sub>3</sub>) δ 7.36 (d, *J* = 7.6 Hz, 1H, ArH), 7.20 (t, *J* = 7.6 Hz, 1H, ArH), 7.10 (t, *J* = 7.6 Hz, 1H, ArH), 7.05 (s, 4H, ArH), 6.55 (d, *J* = 7.6 Hz, 1H, ArH), 2.91 (s, 3H, CH<sub>3</sub>), 2.22-2.03 (m, 2H, CH<sub>2</sub>), 1.28-1.20 (m, 2H, CH<sub>2</sub>), 1.11-0.96 (m, 2H, CH<sub>2</sub>), 0.80 (t, *J* = 7.2 Hz, 3H, CH<sub>3</sub>). <sup>13</sup>C NMR (100 MHz, CDCl<sub>3</sub>) δ 176.0, 143.2, 137.6, 135.8, 129.6, 128.7, 128.3, 128.1, 124.1, 122.7, 108.0, 59.4, 34.6, 27.0, 26.1, 22.7, 13.8. HRMS (ESI) *m/z*: calcd for C<sub>19</sub>H<sub>20</sub>ClNNaOS<sup>+</sup> ([M+Na]<sup>+</sup>), 368.0846; found, 368.0844.

## 6. Spectroscopic data for C3-alkylated 3-thioxindolin-2-one (4)

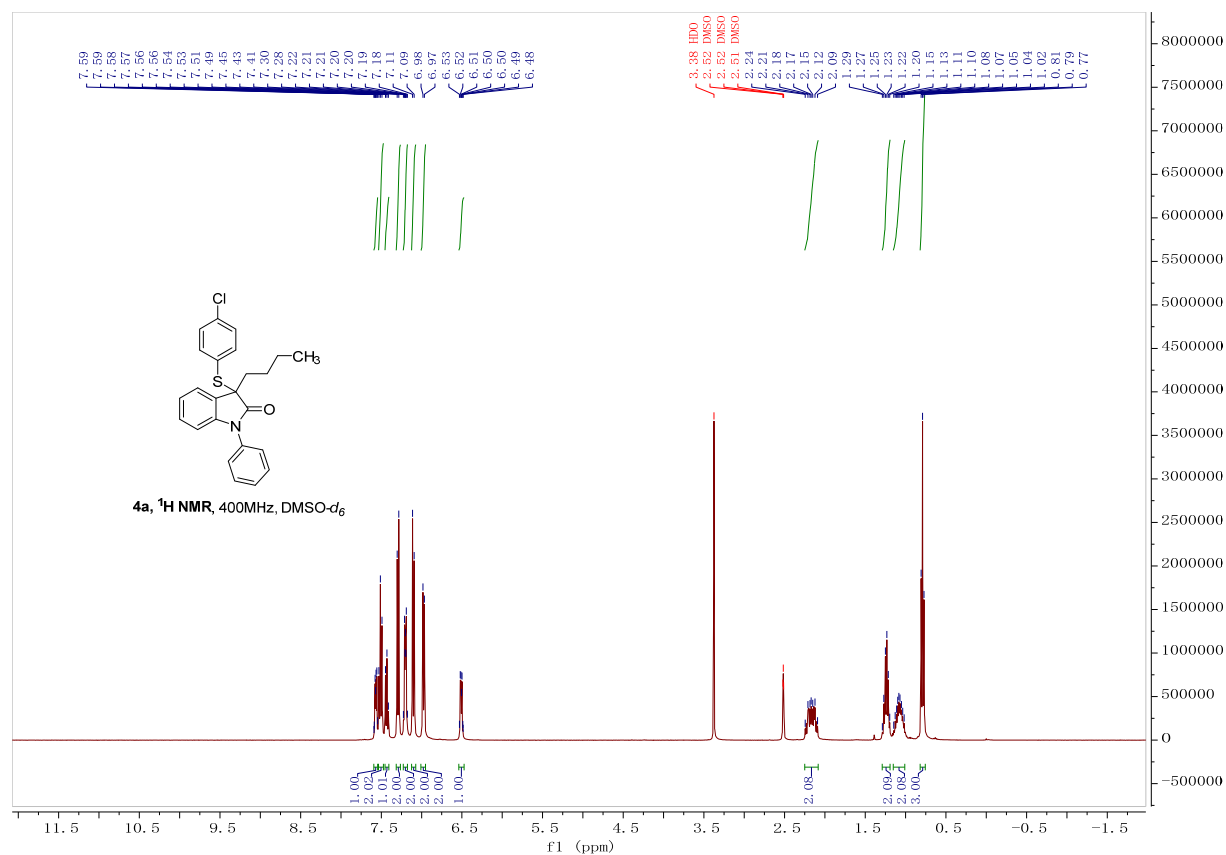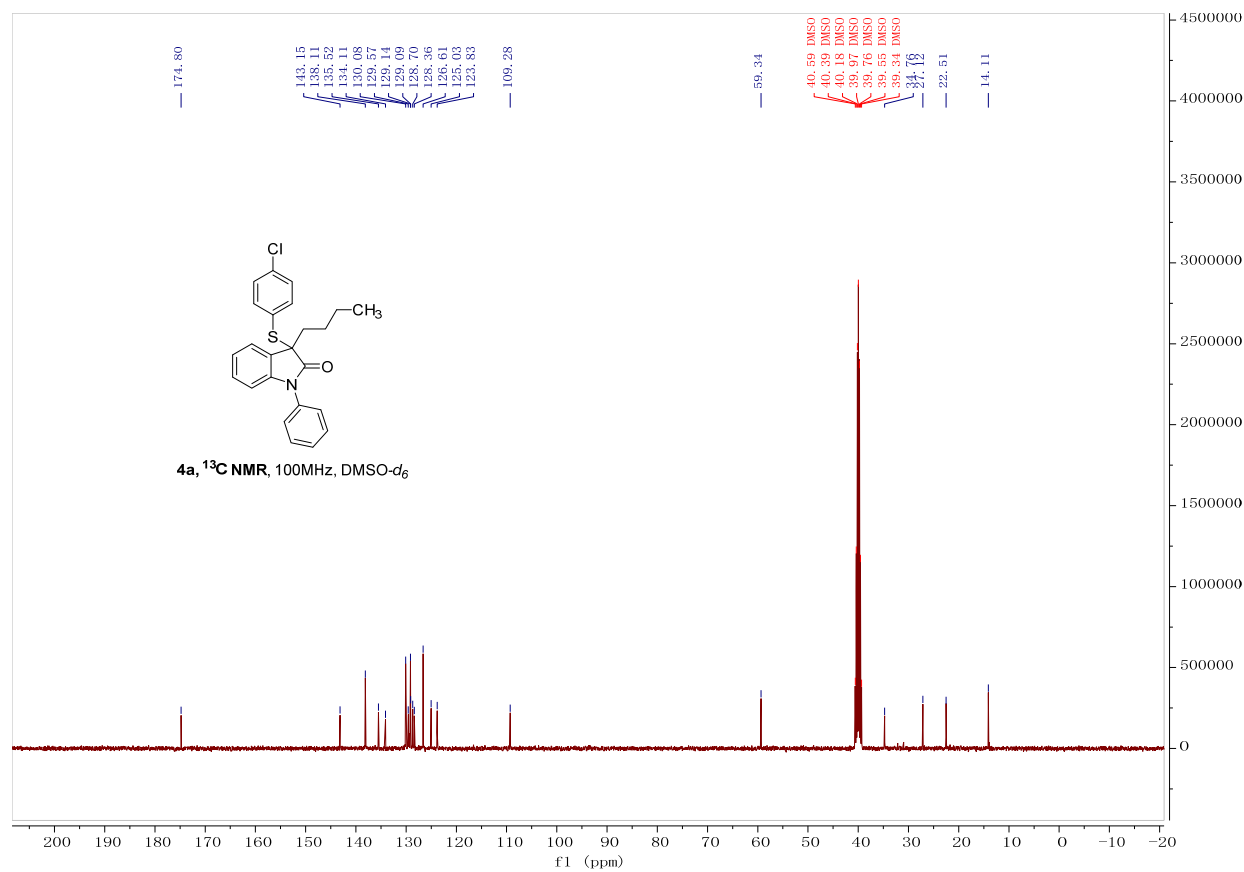



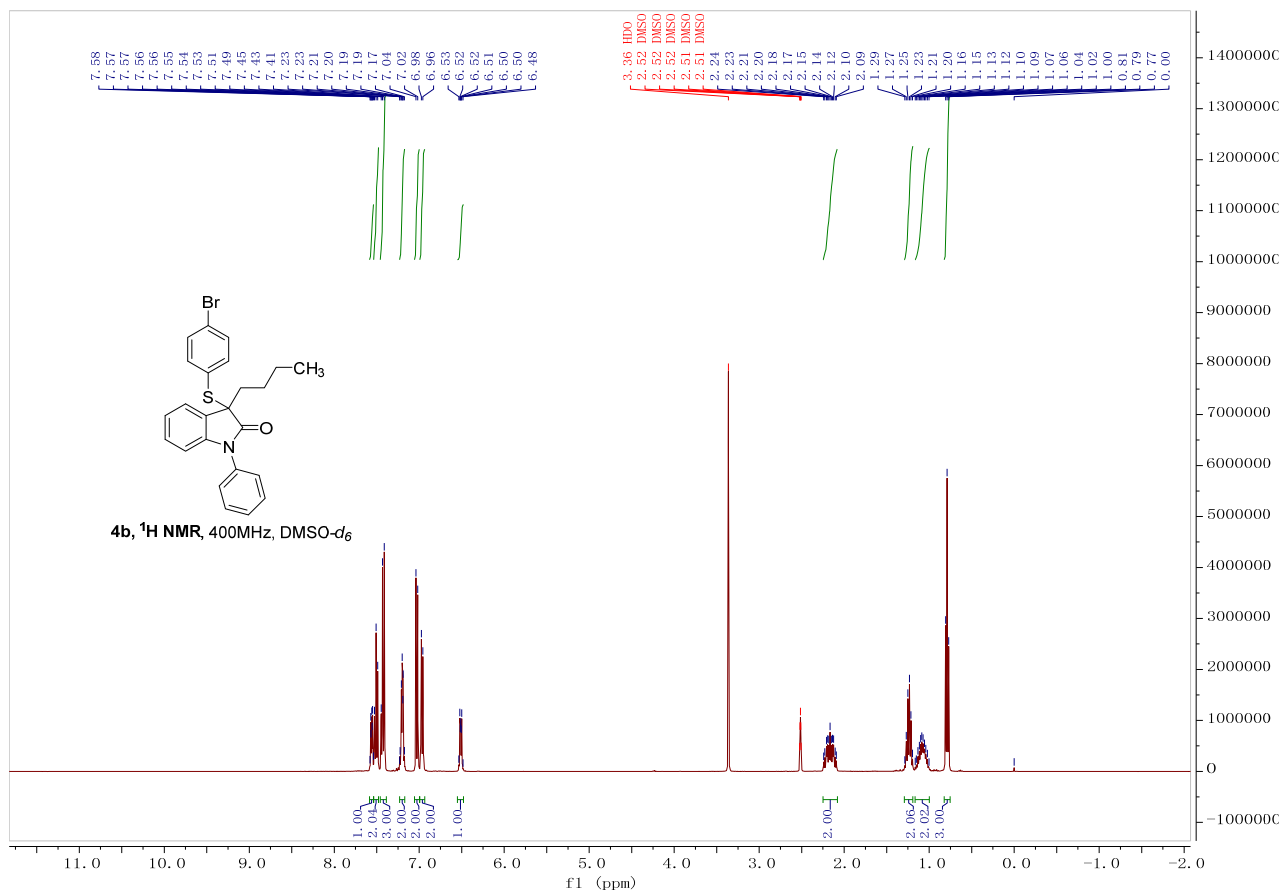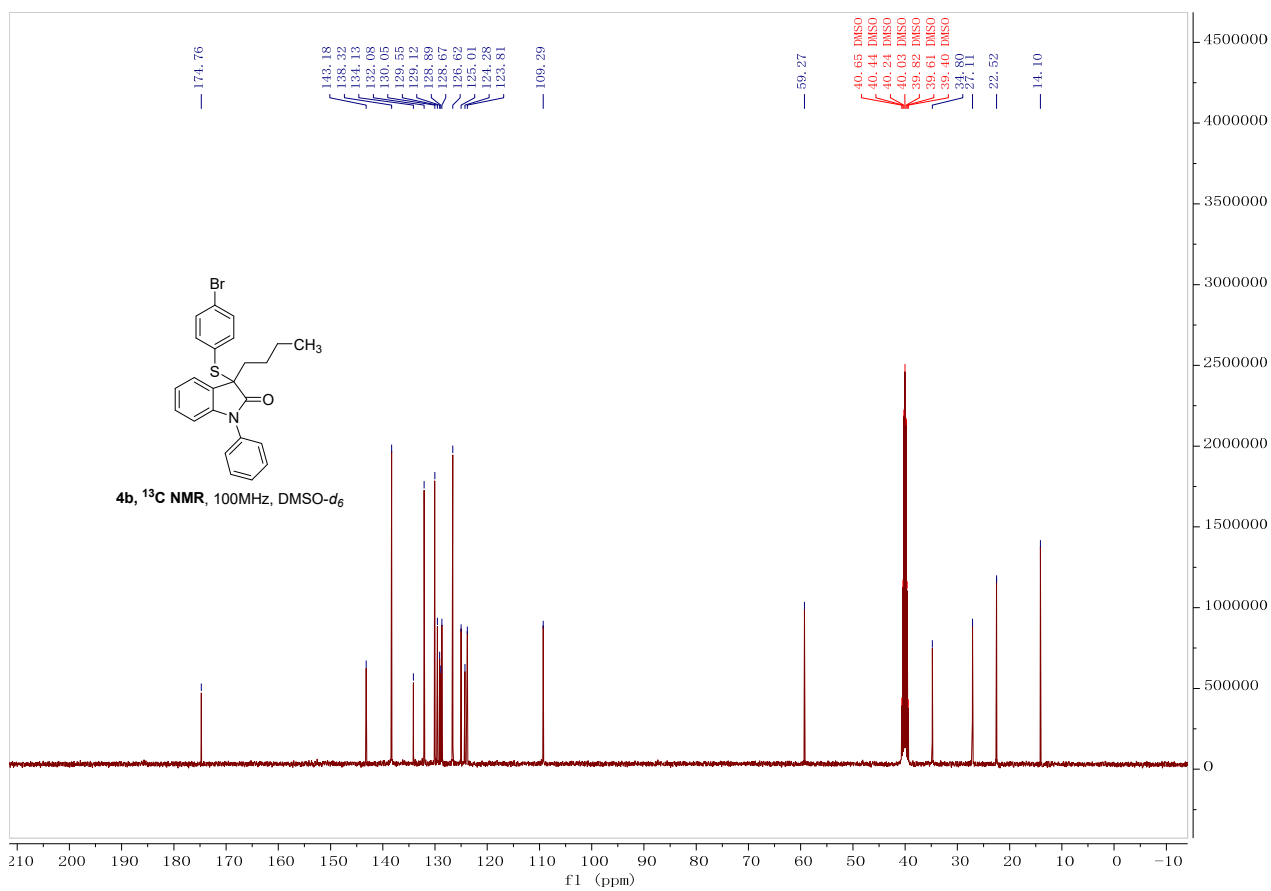

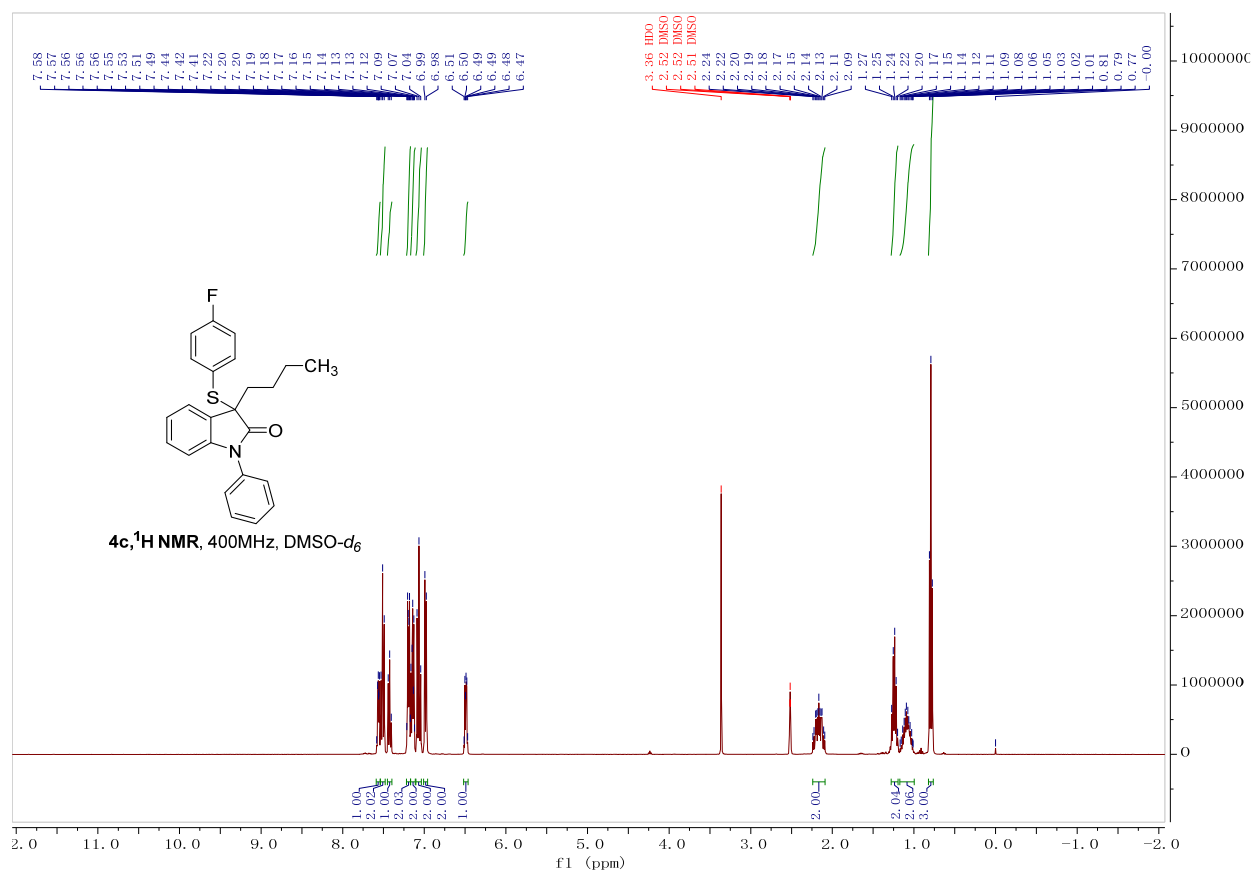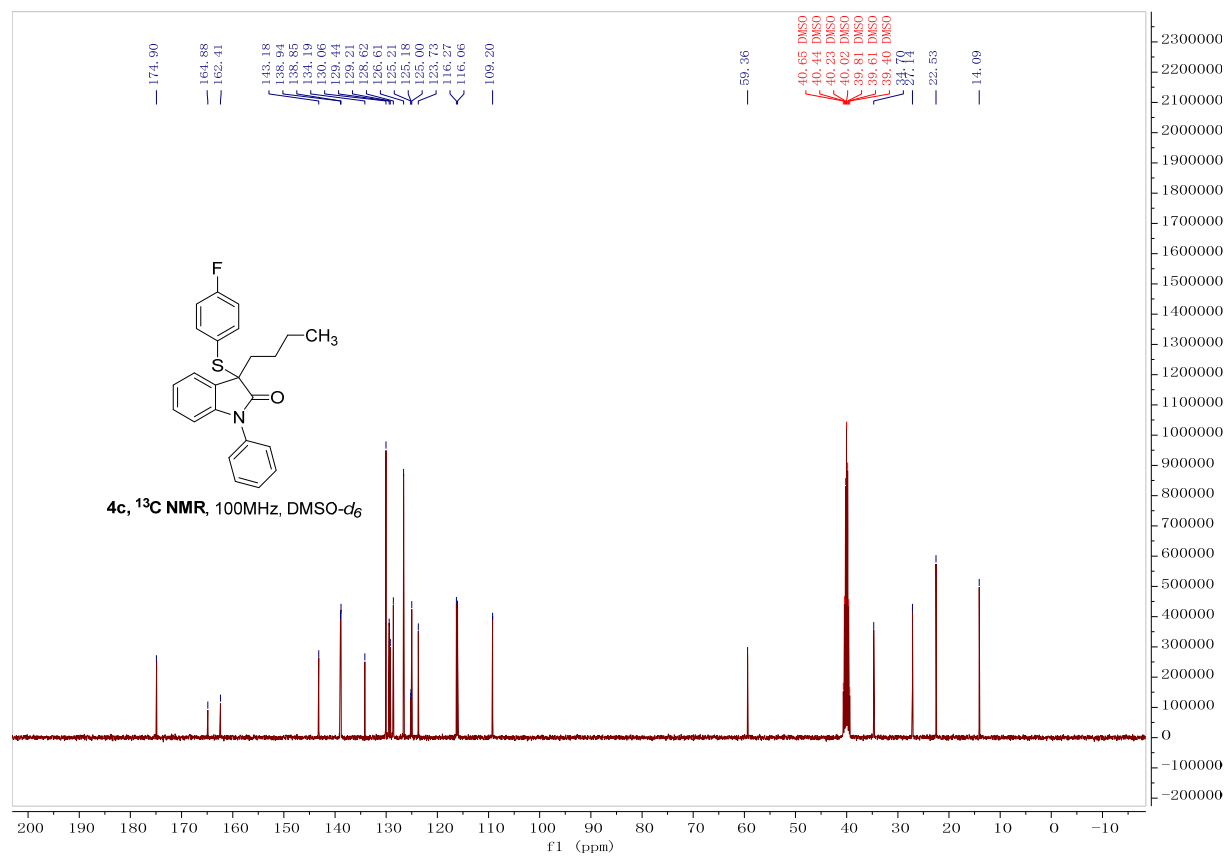

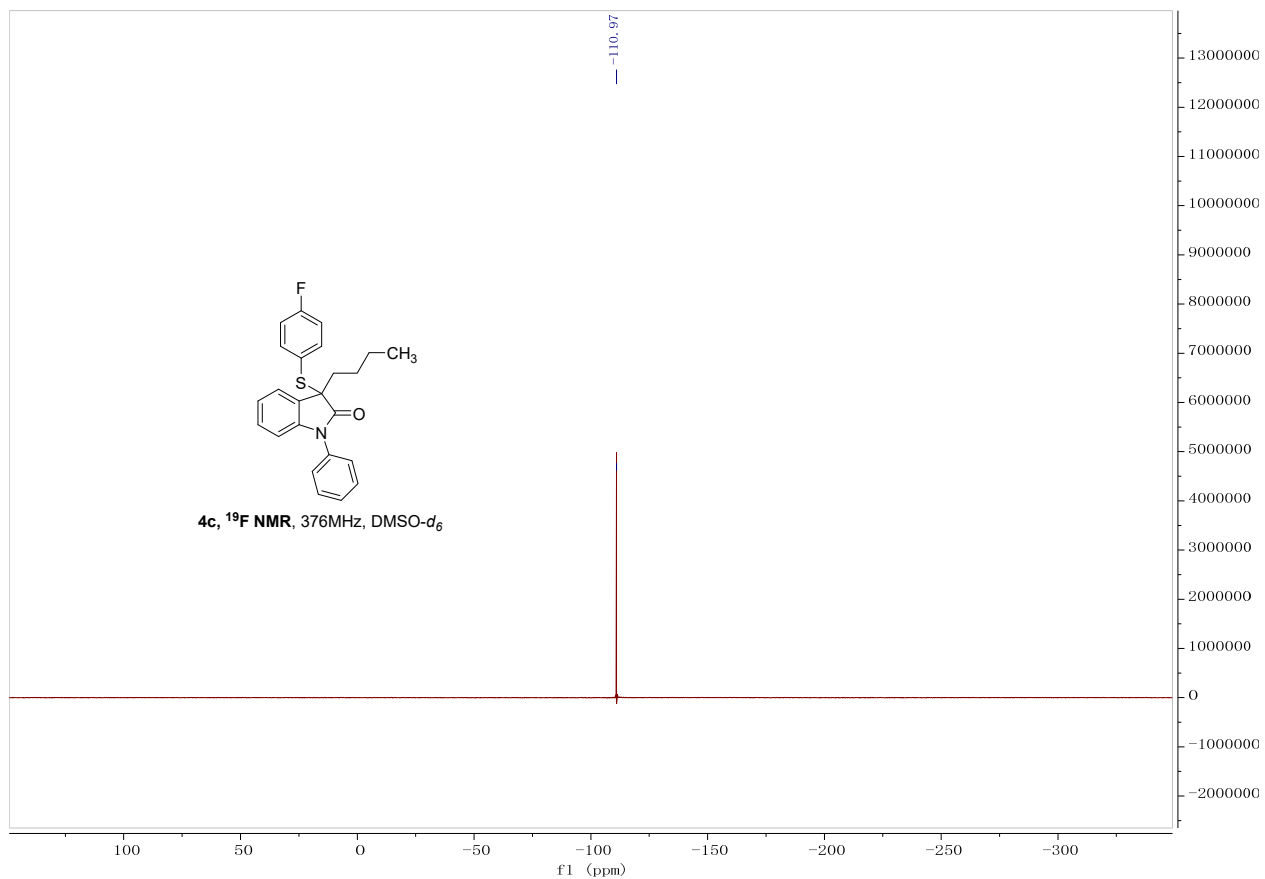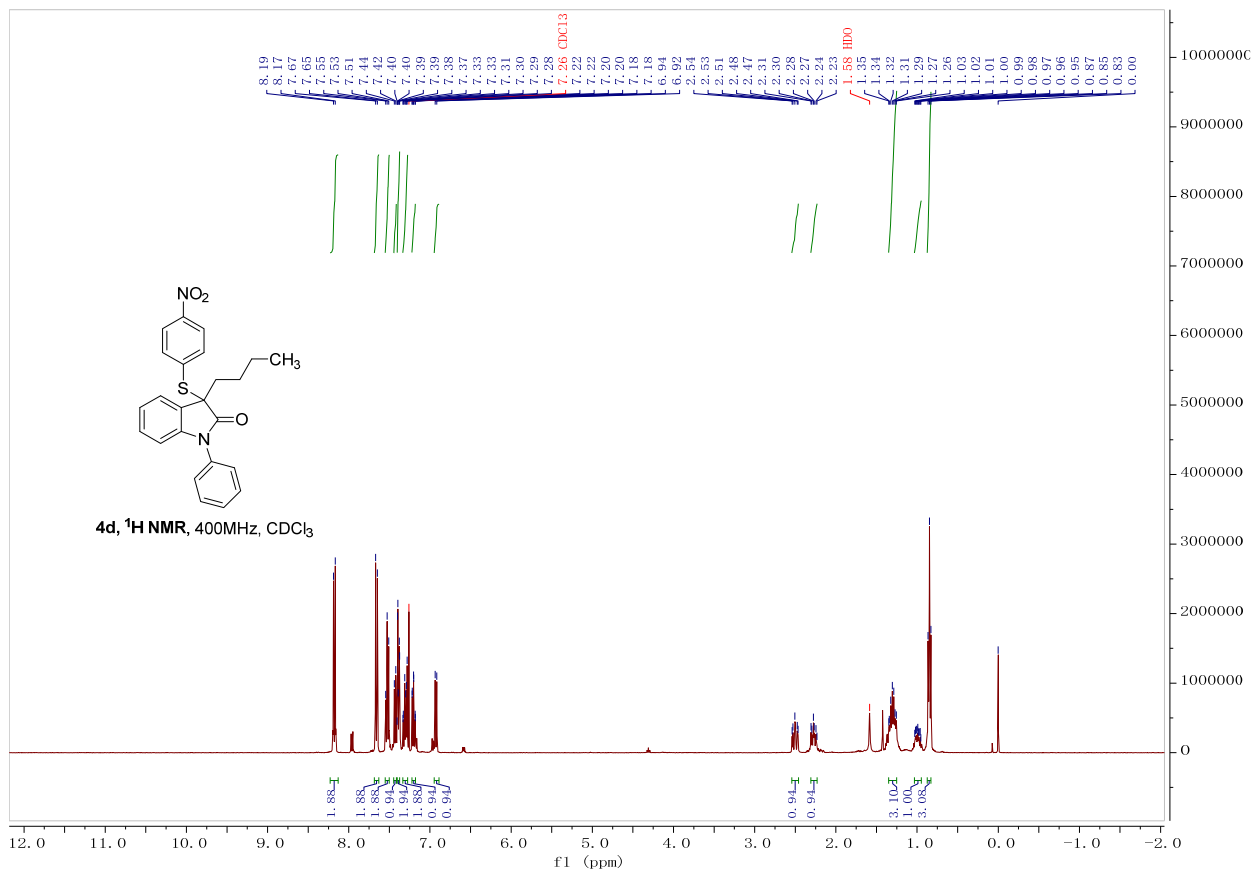

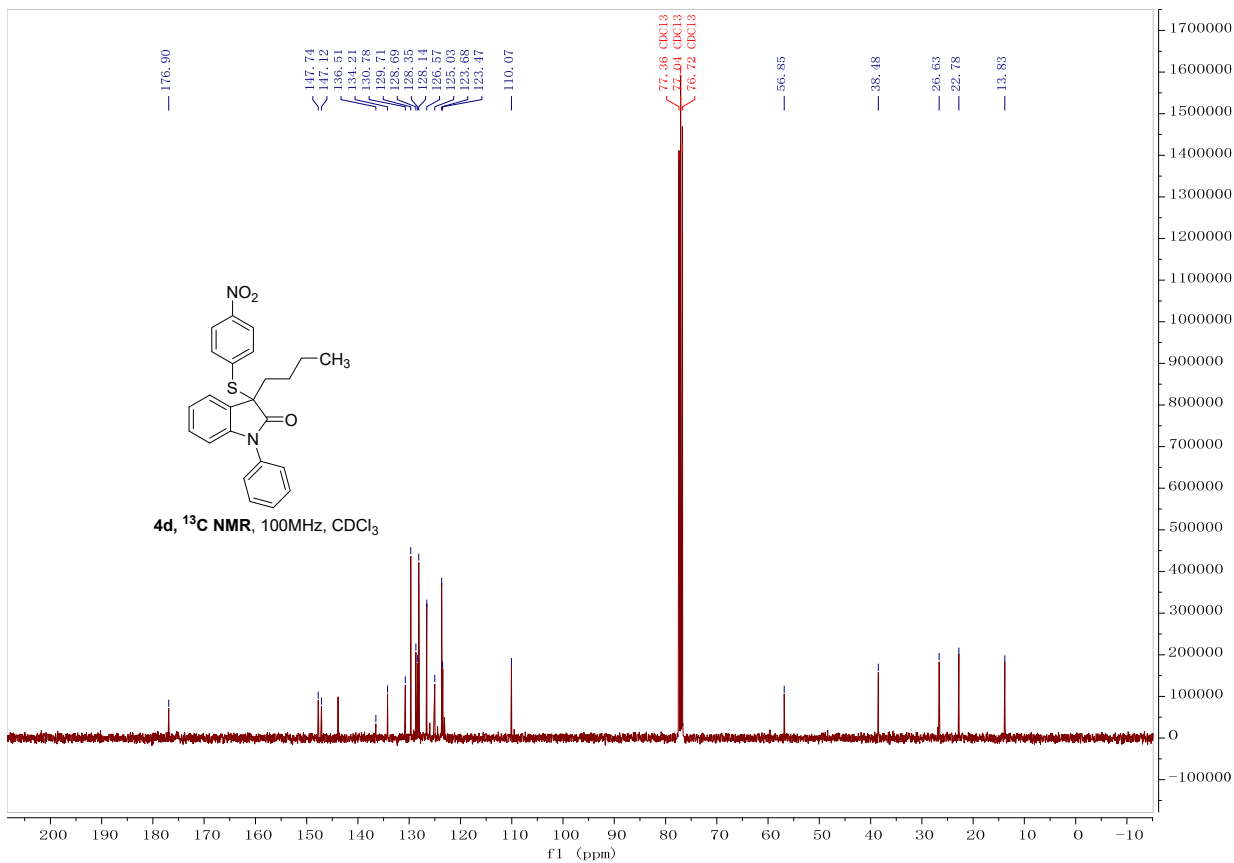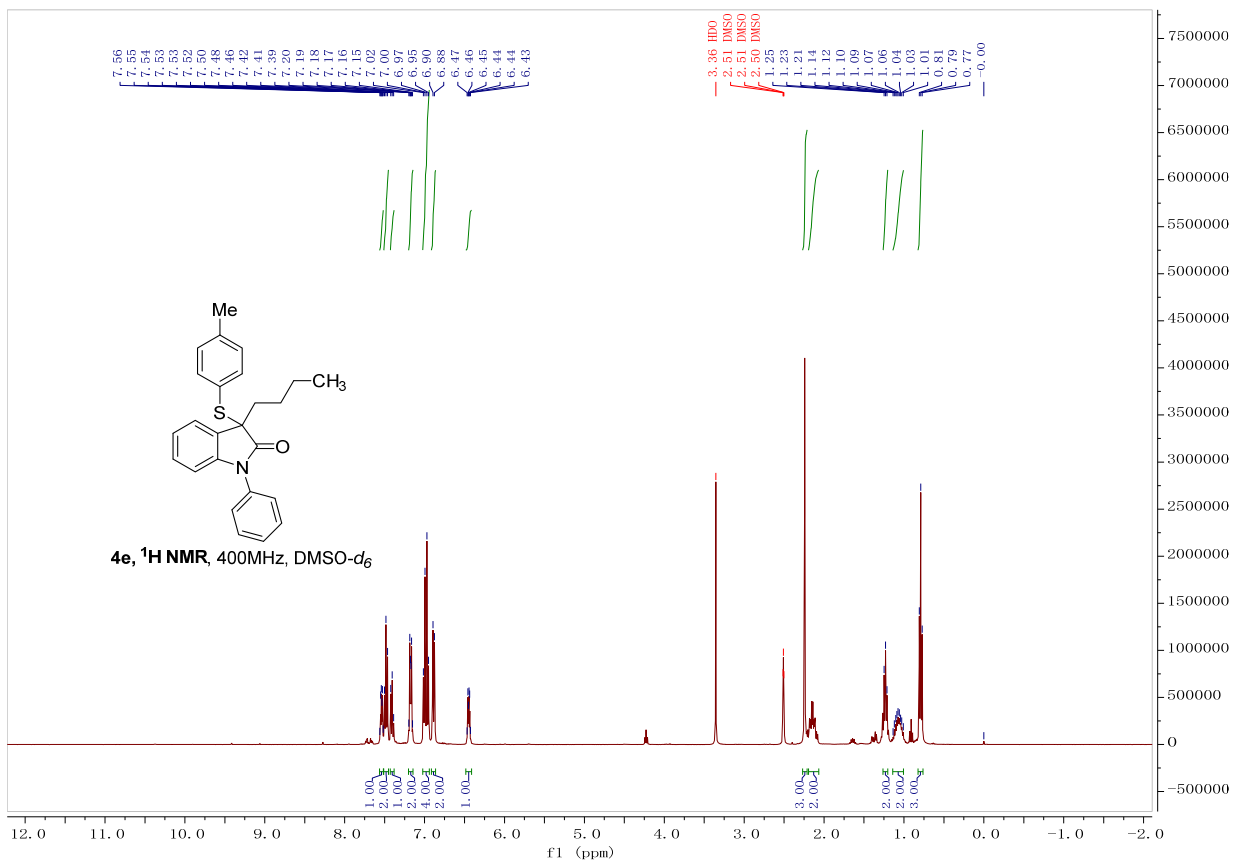

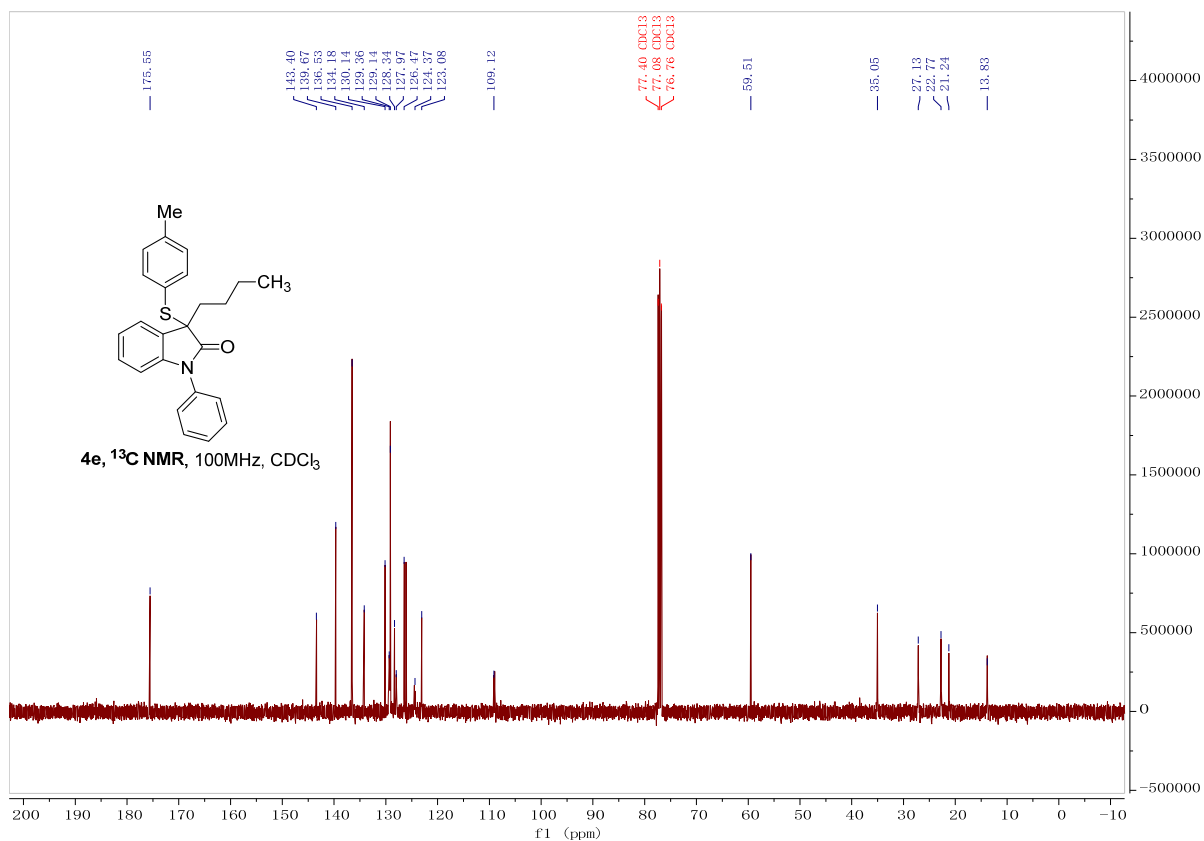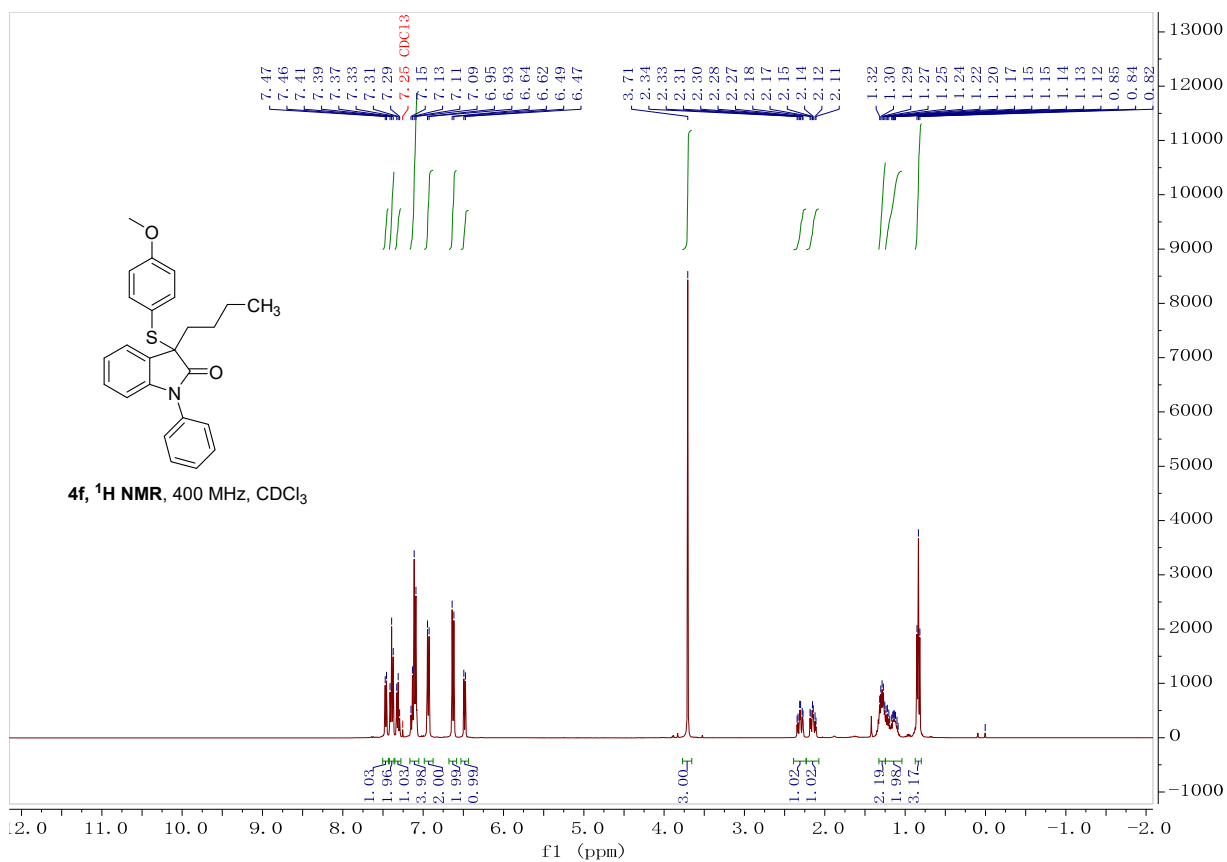



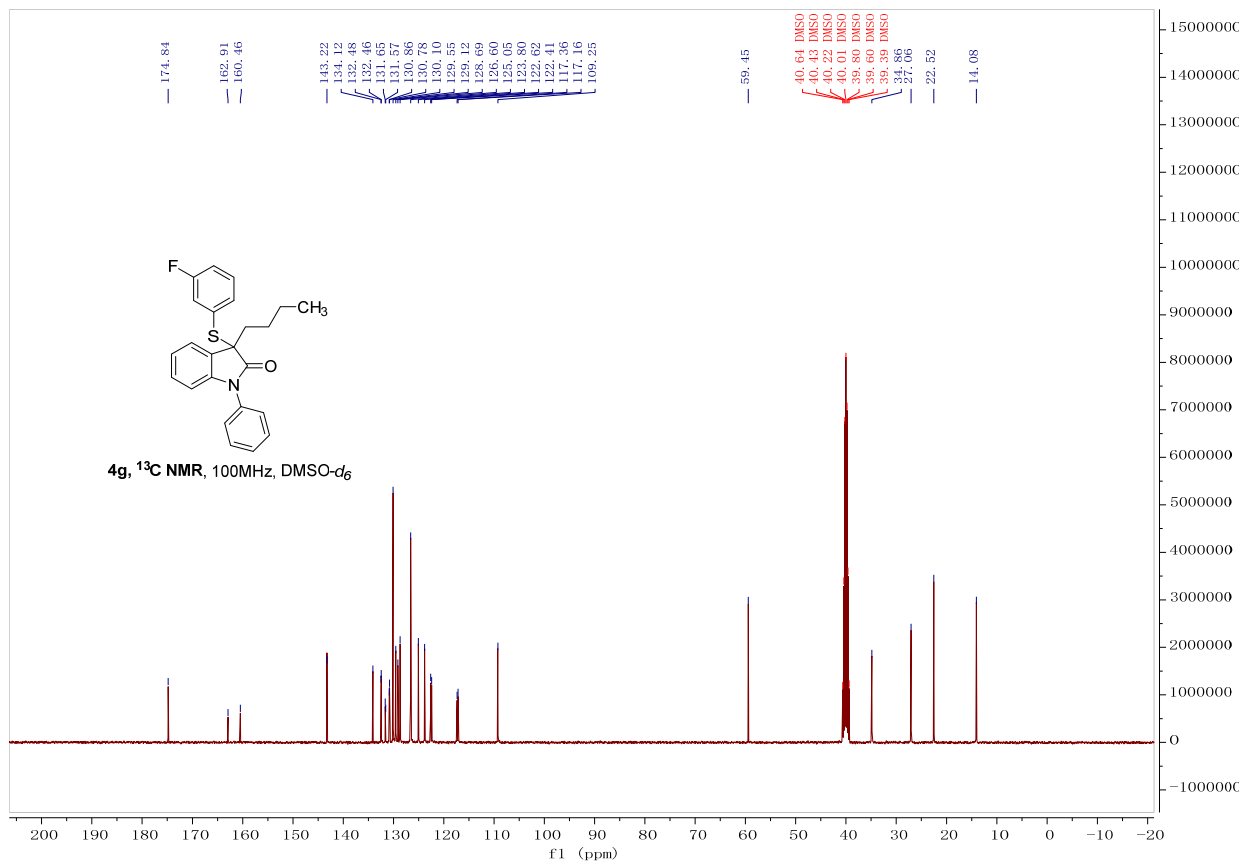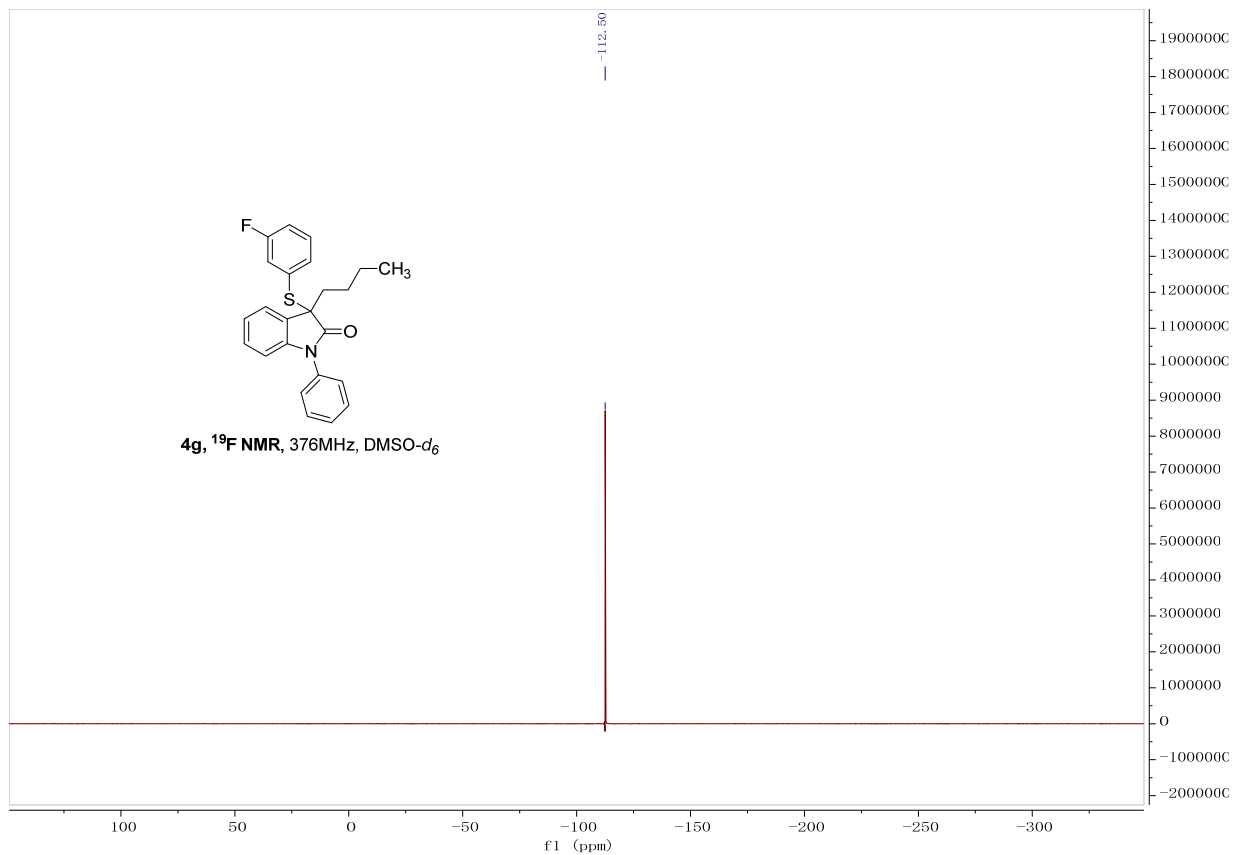

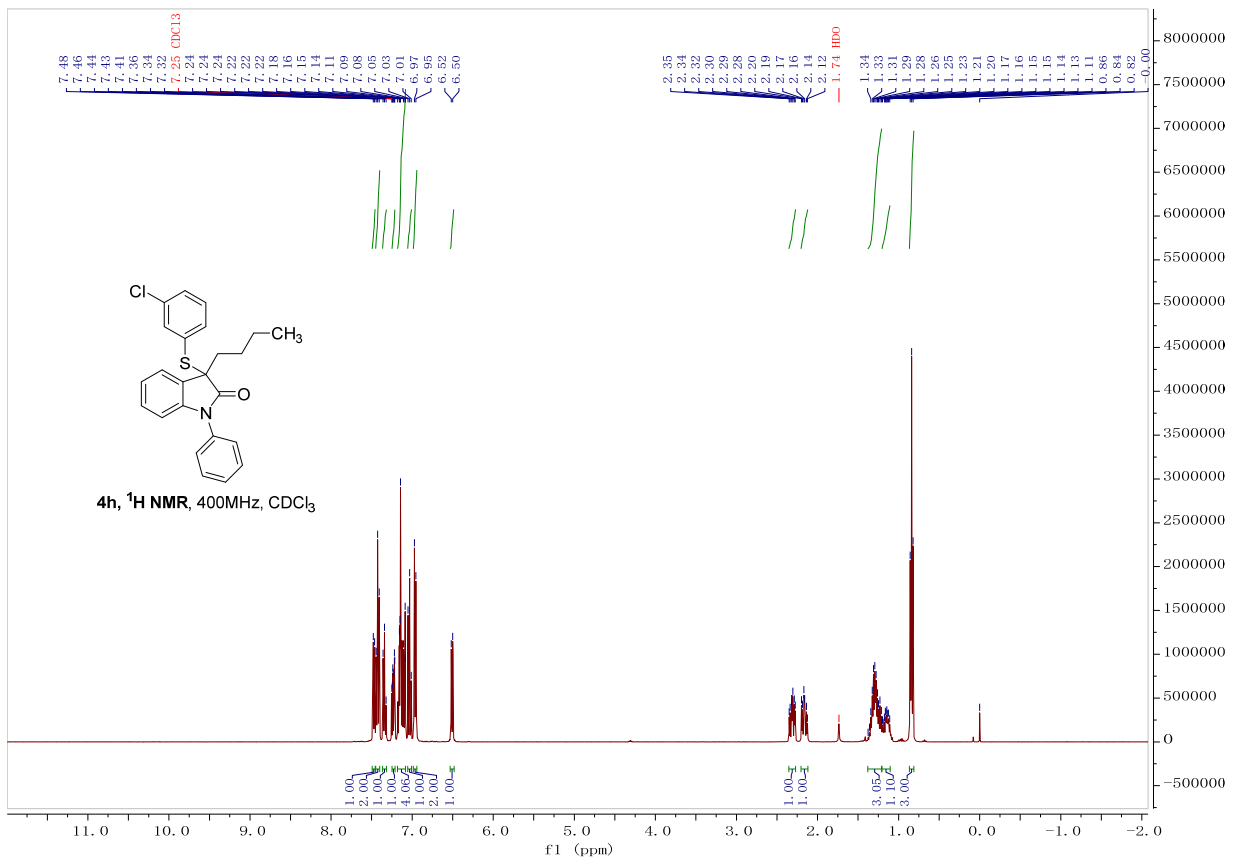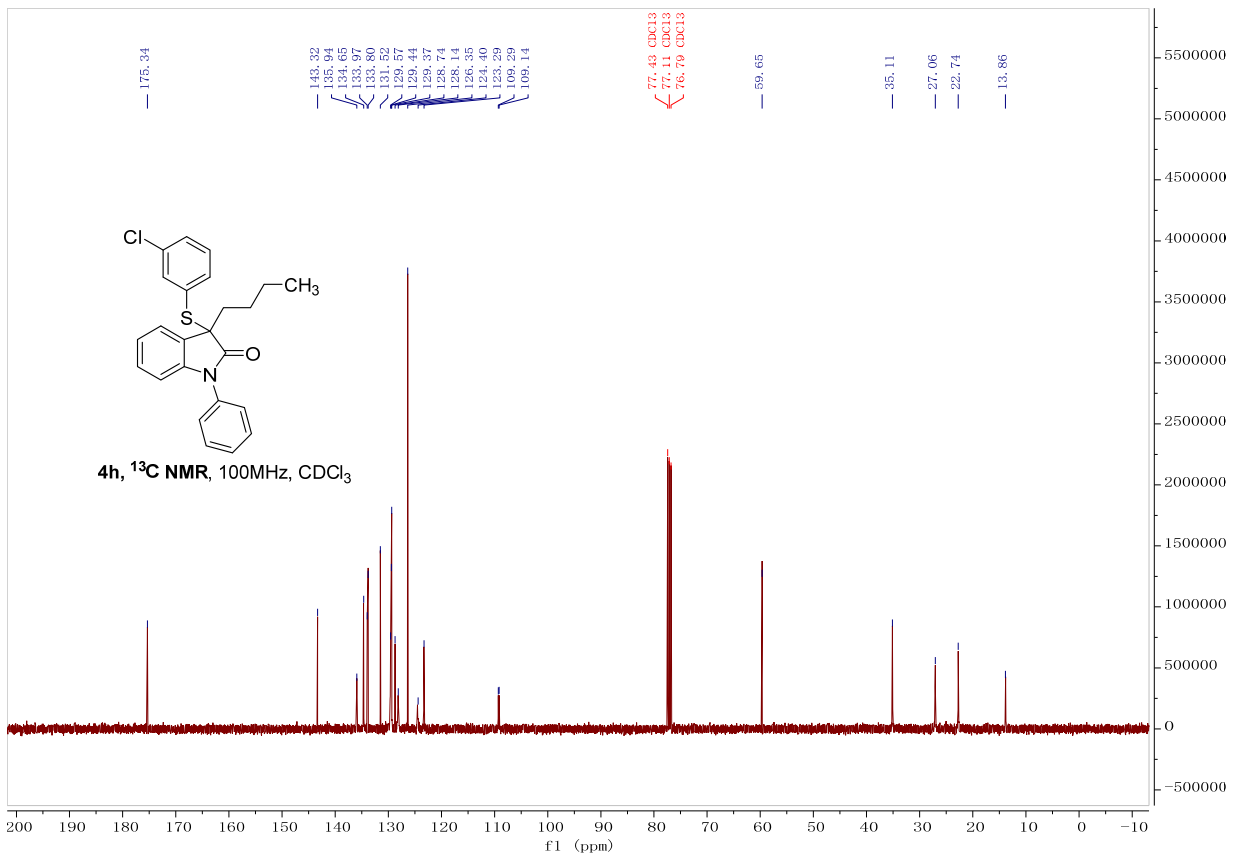



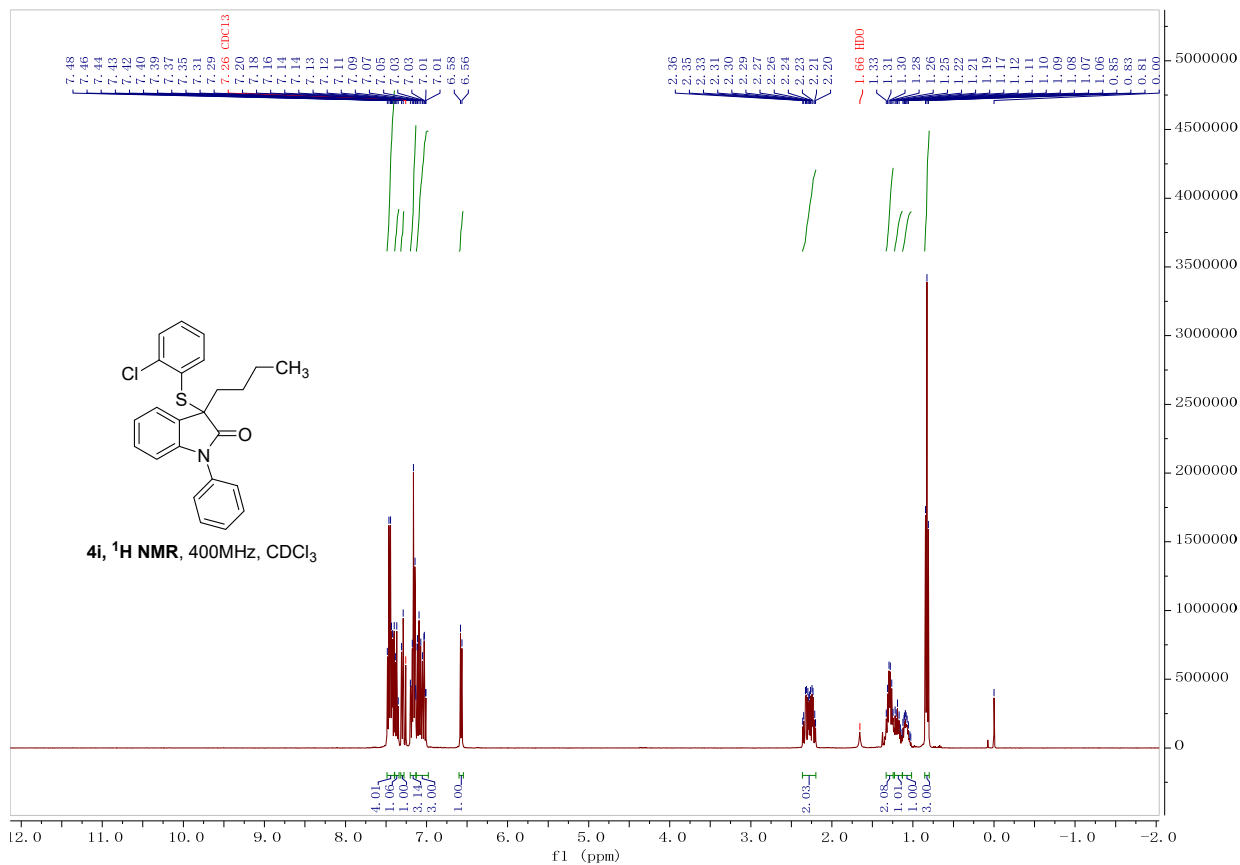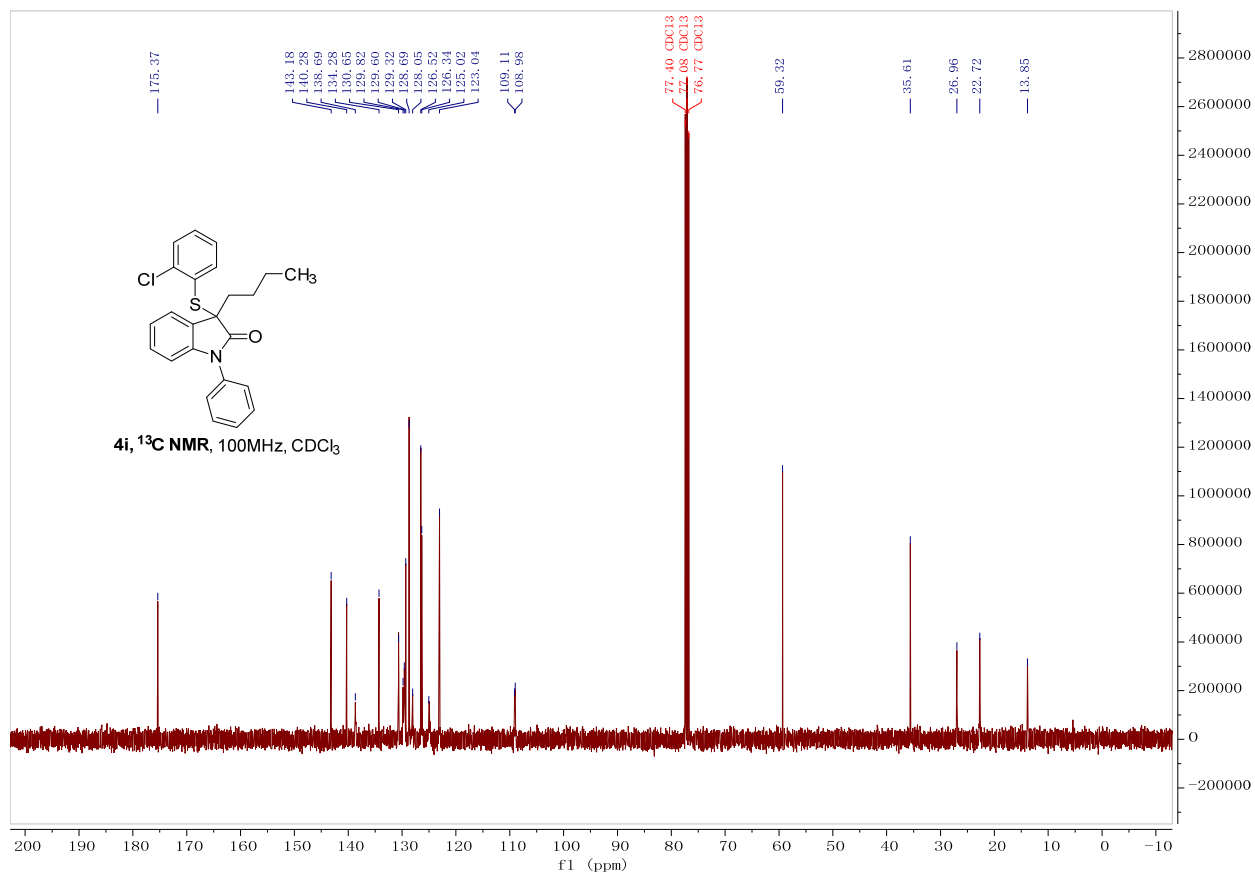

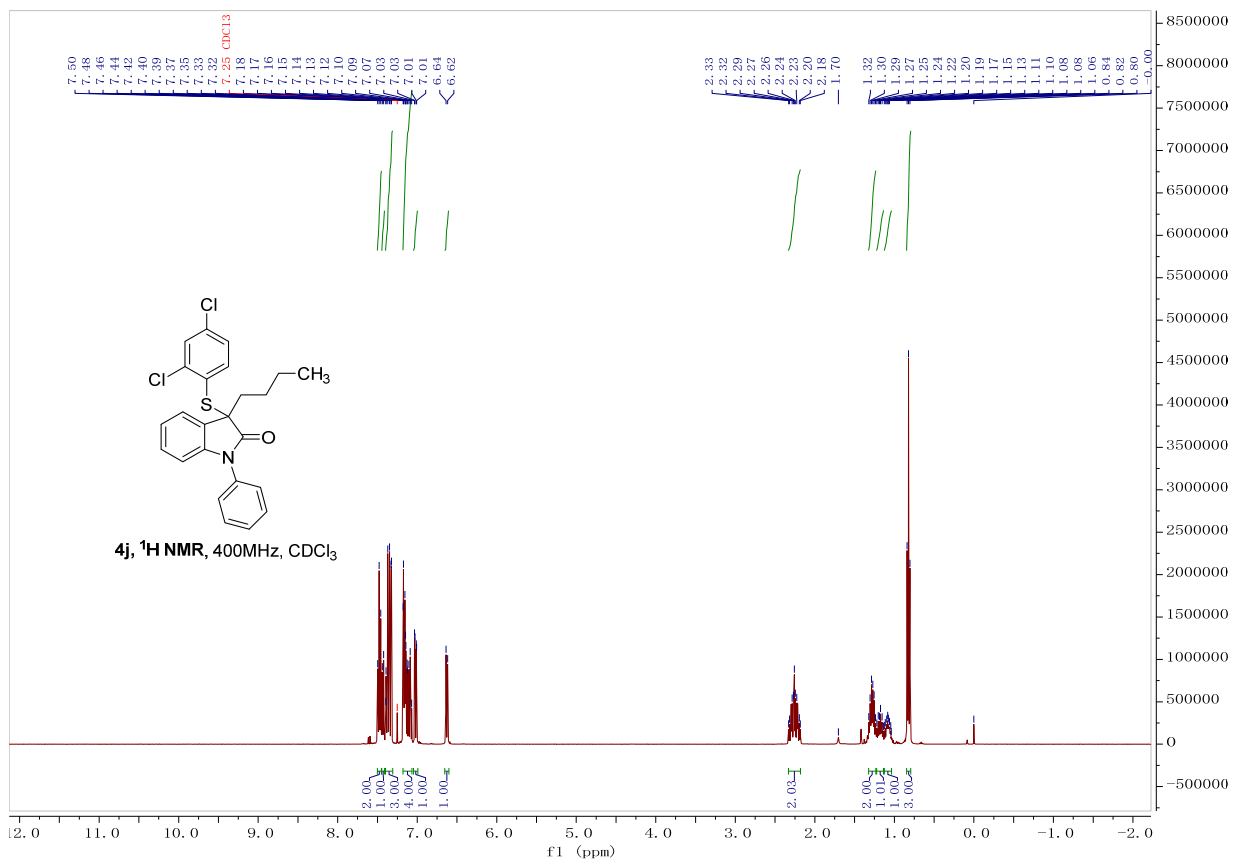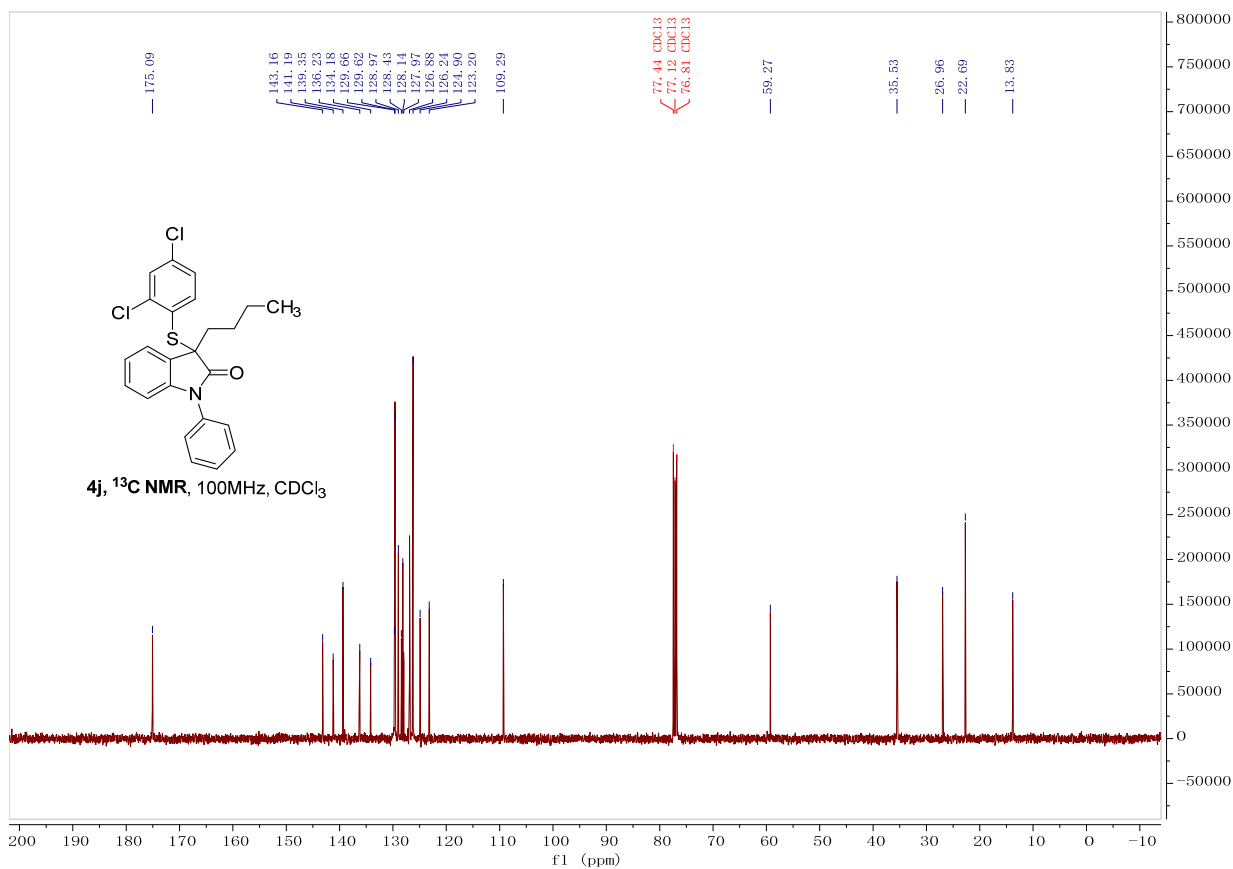

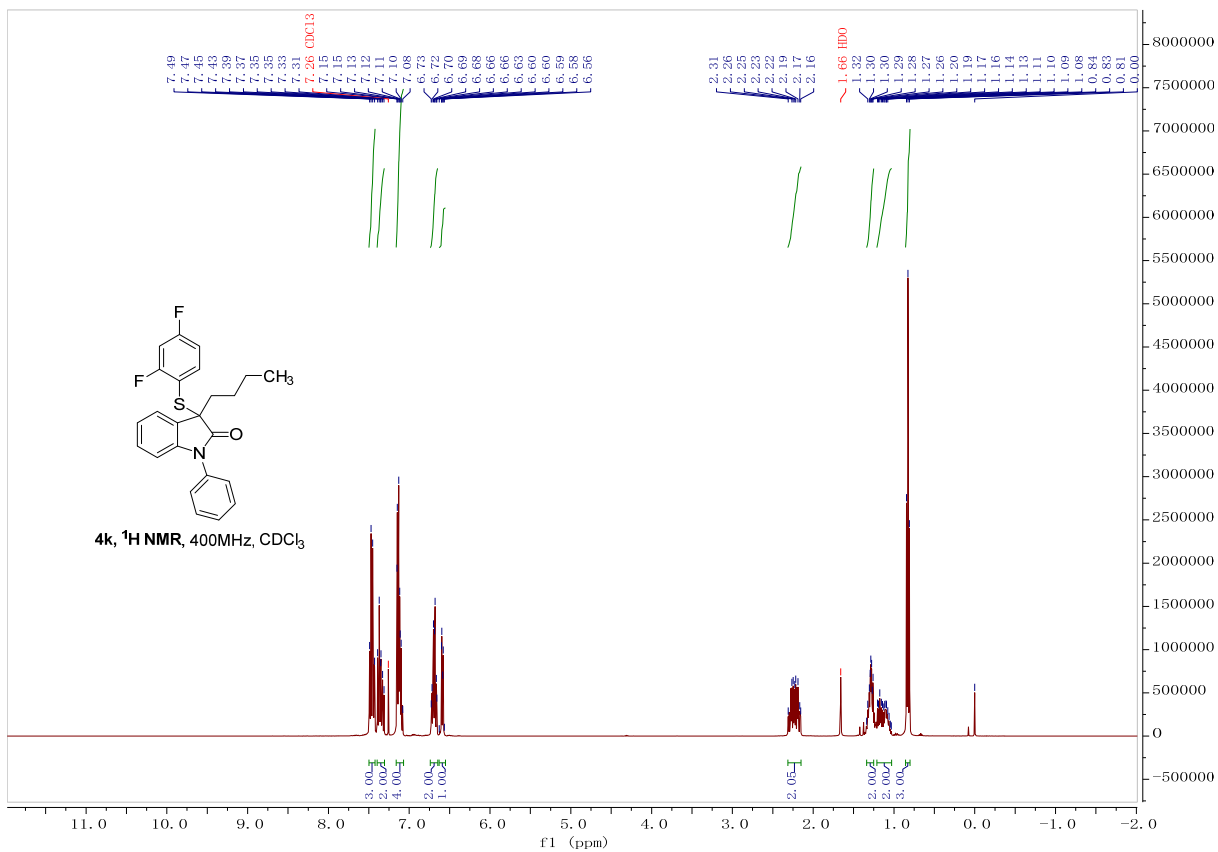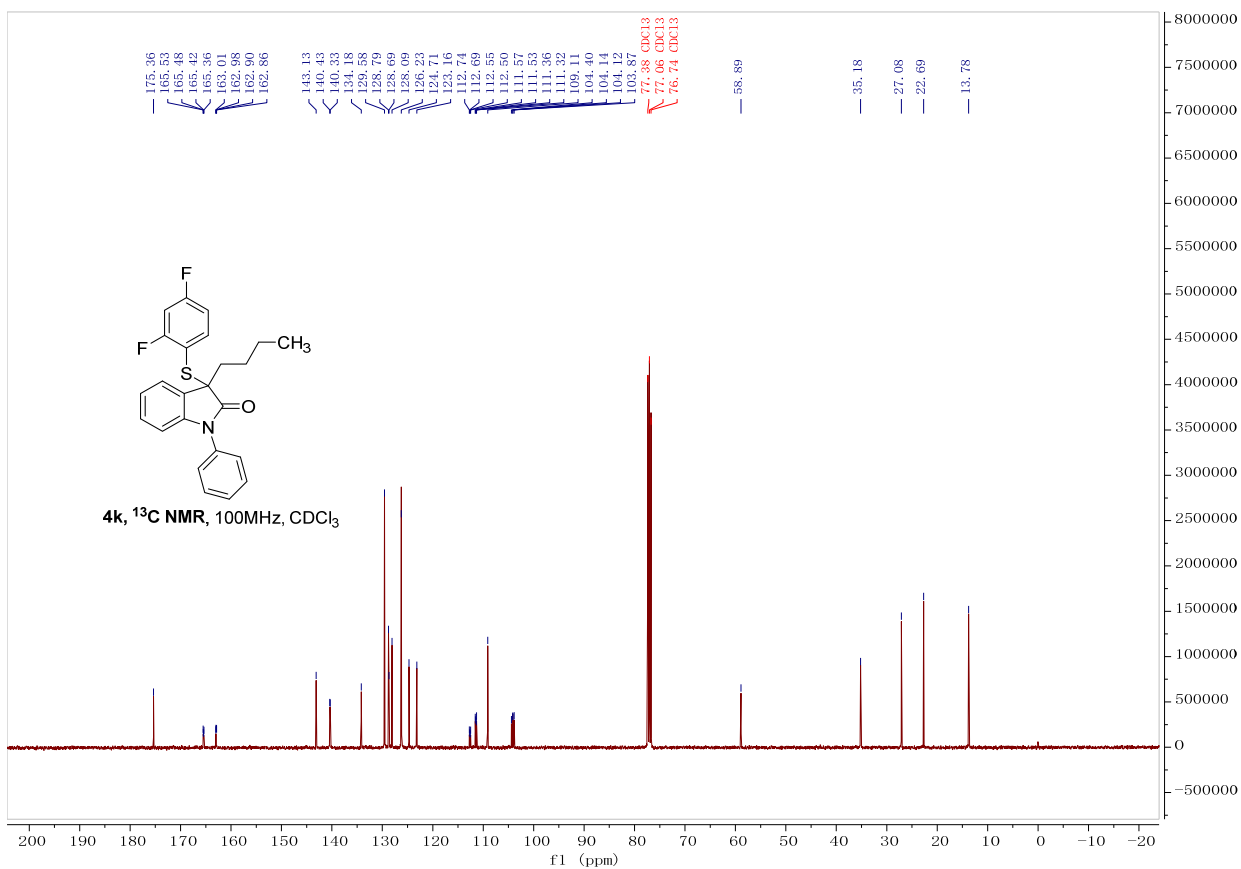

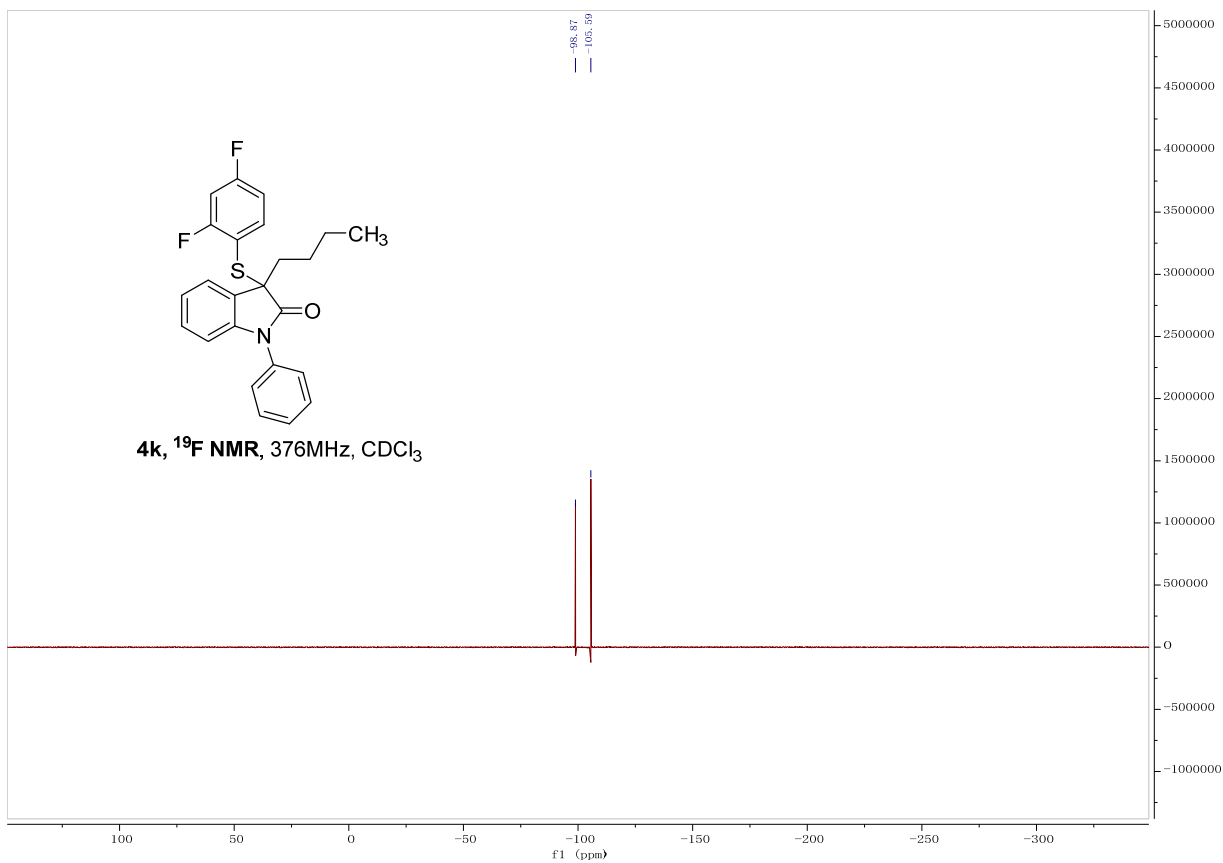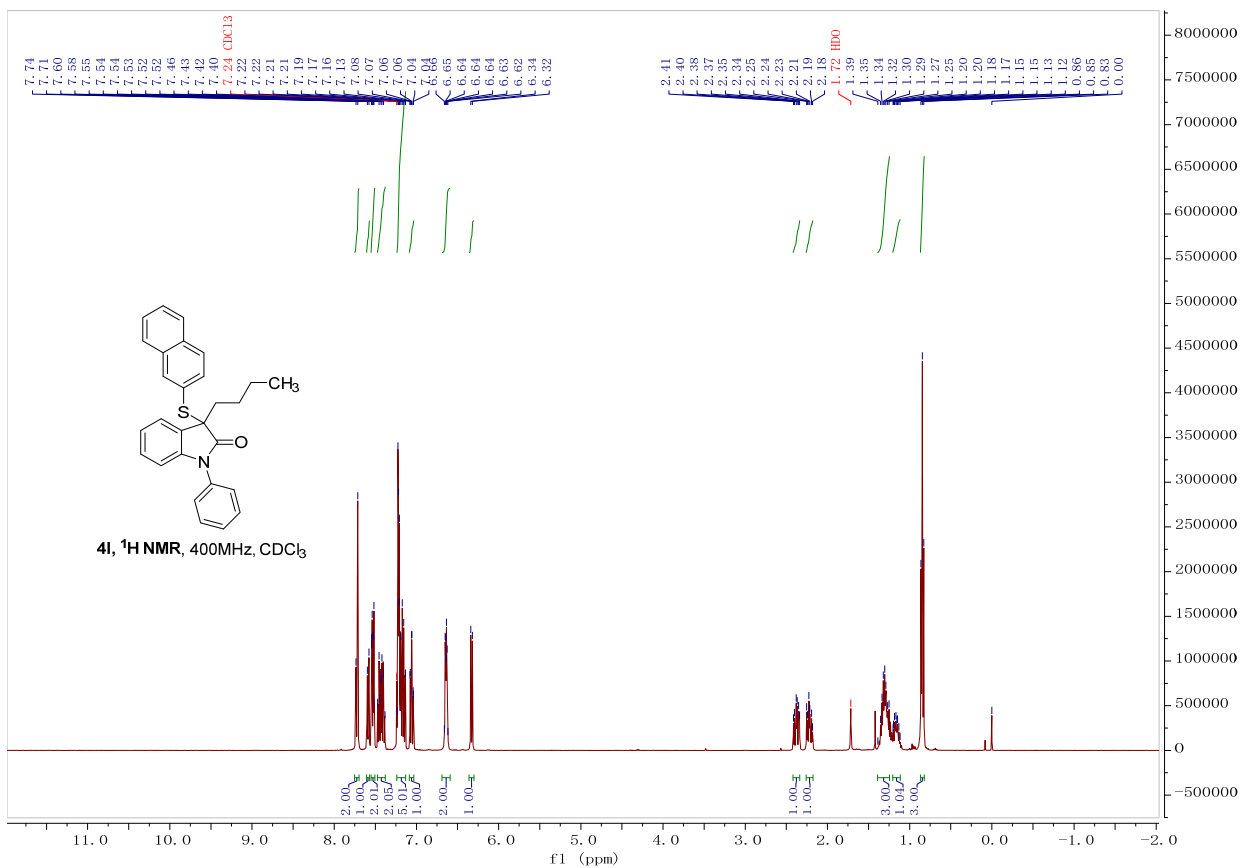

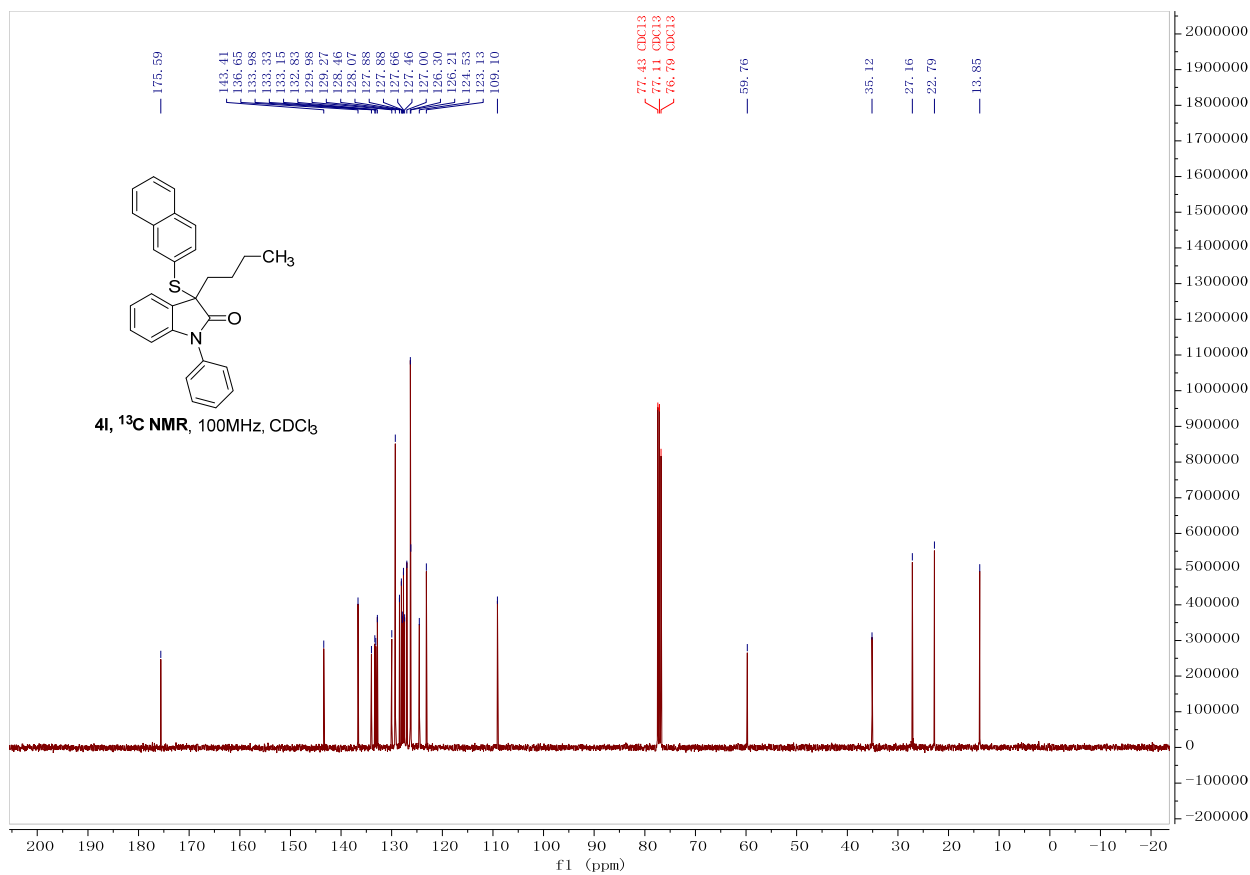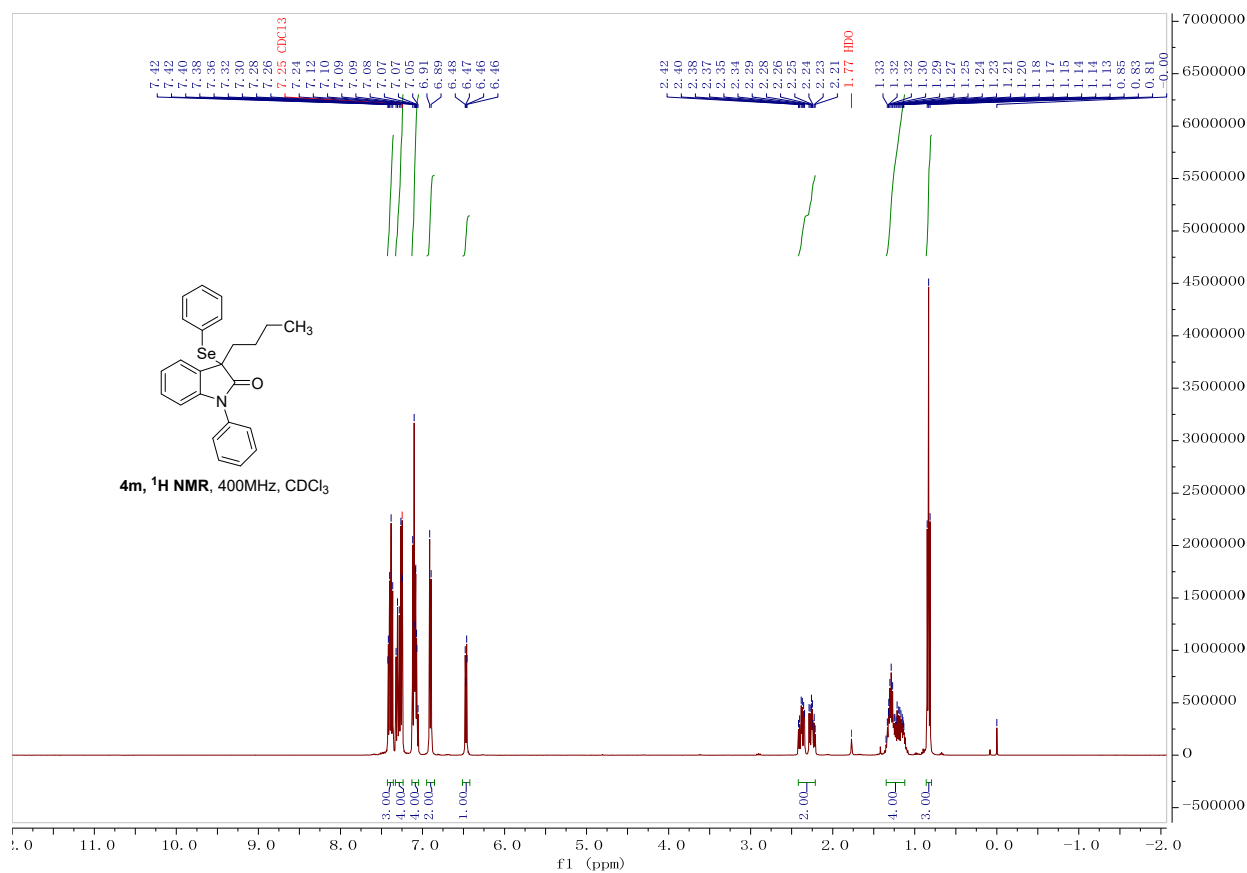

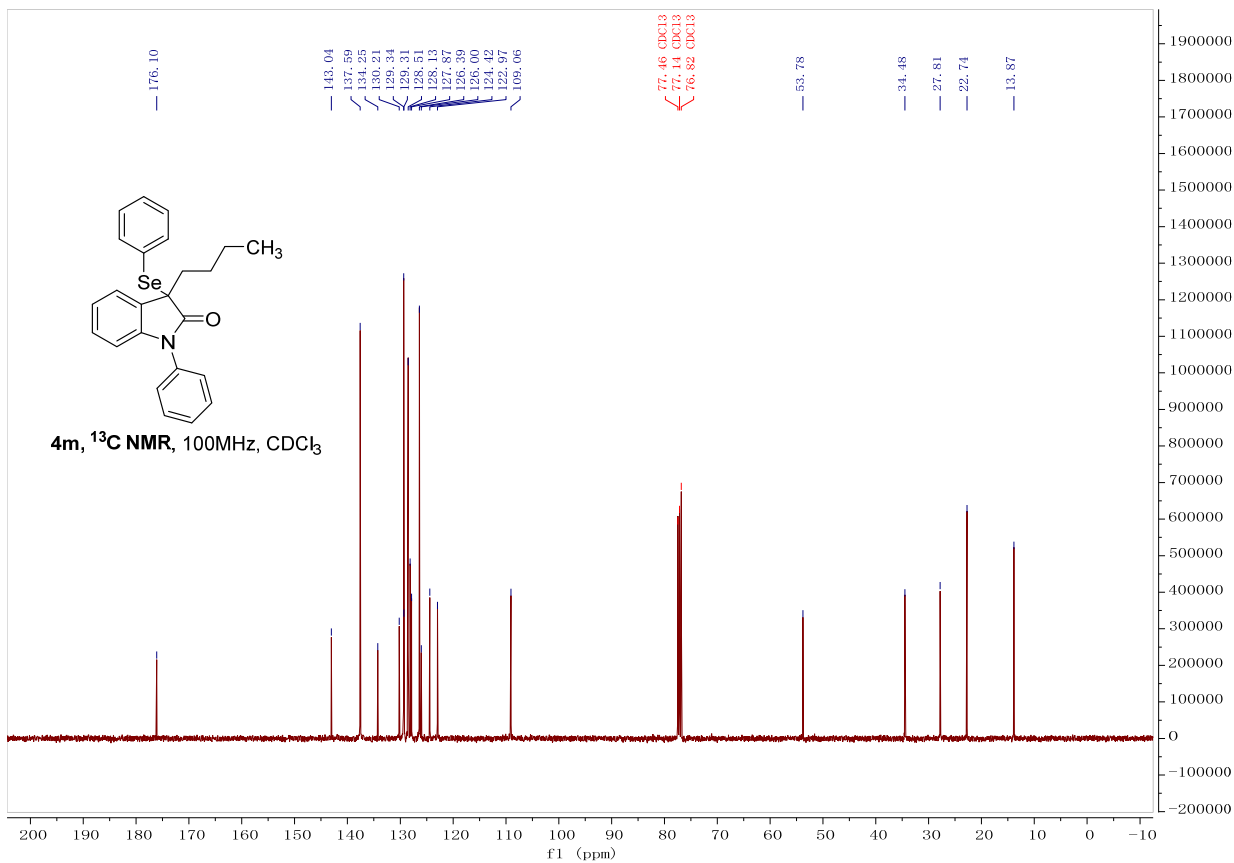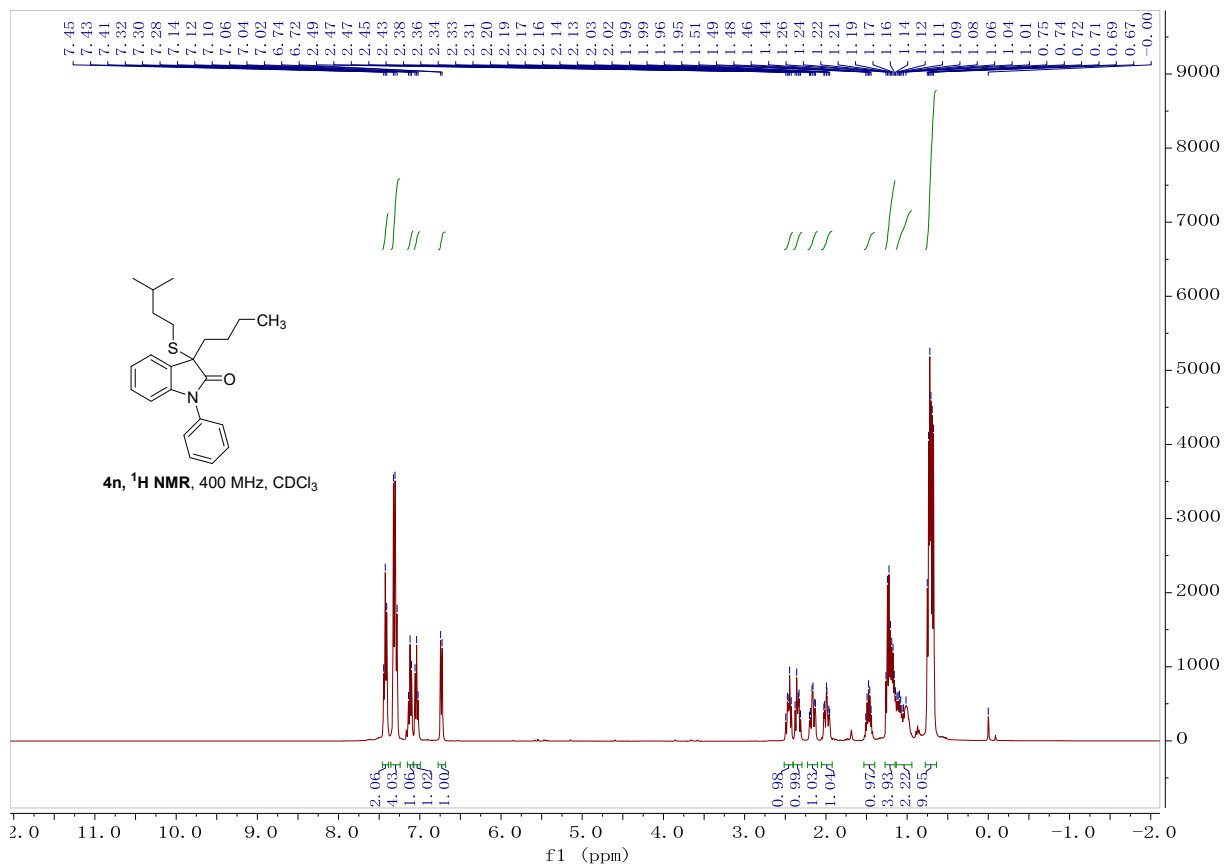

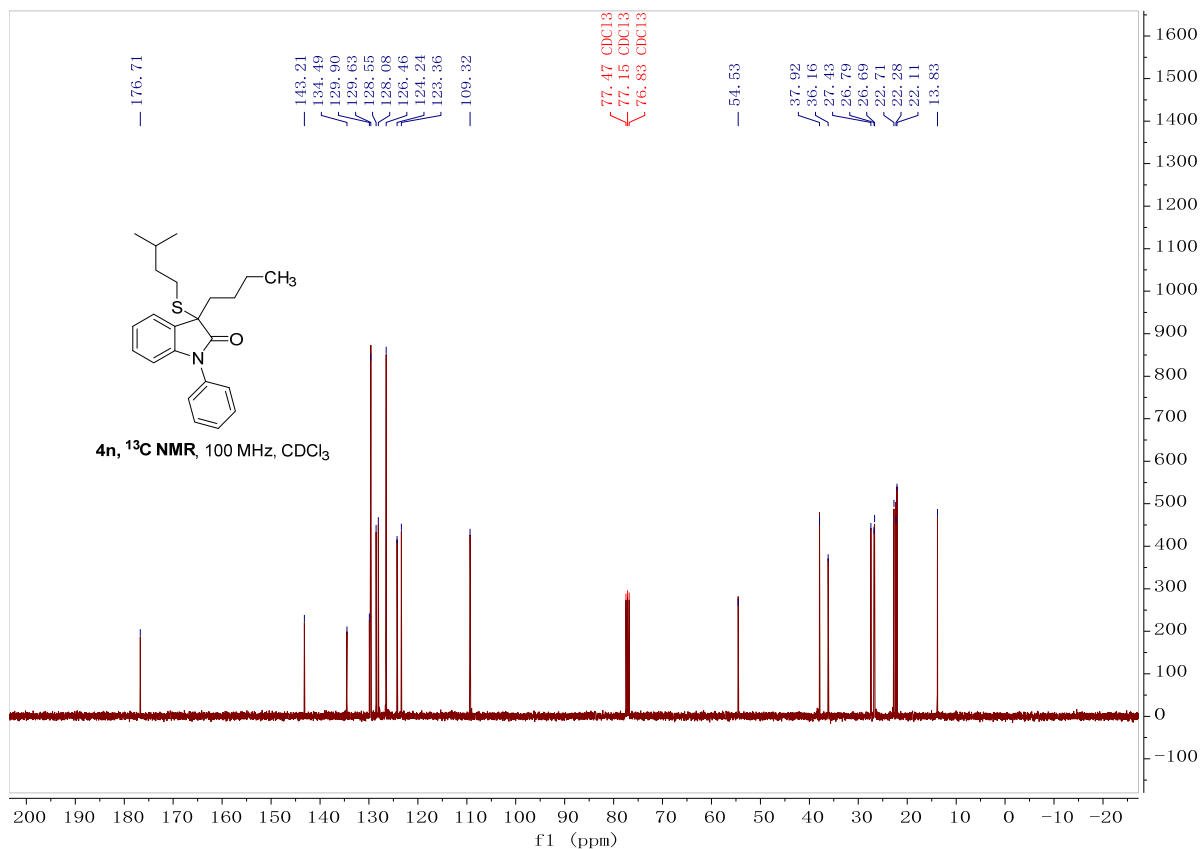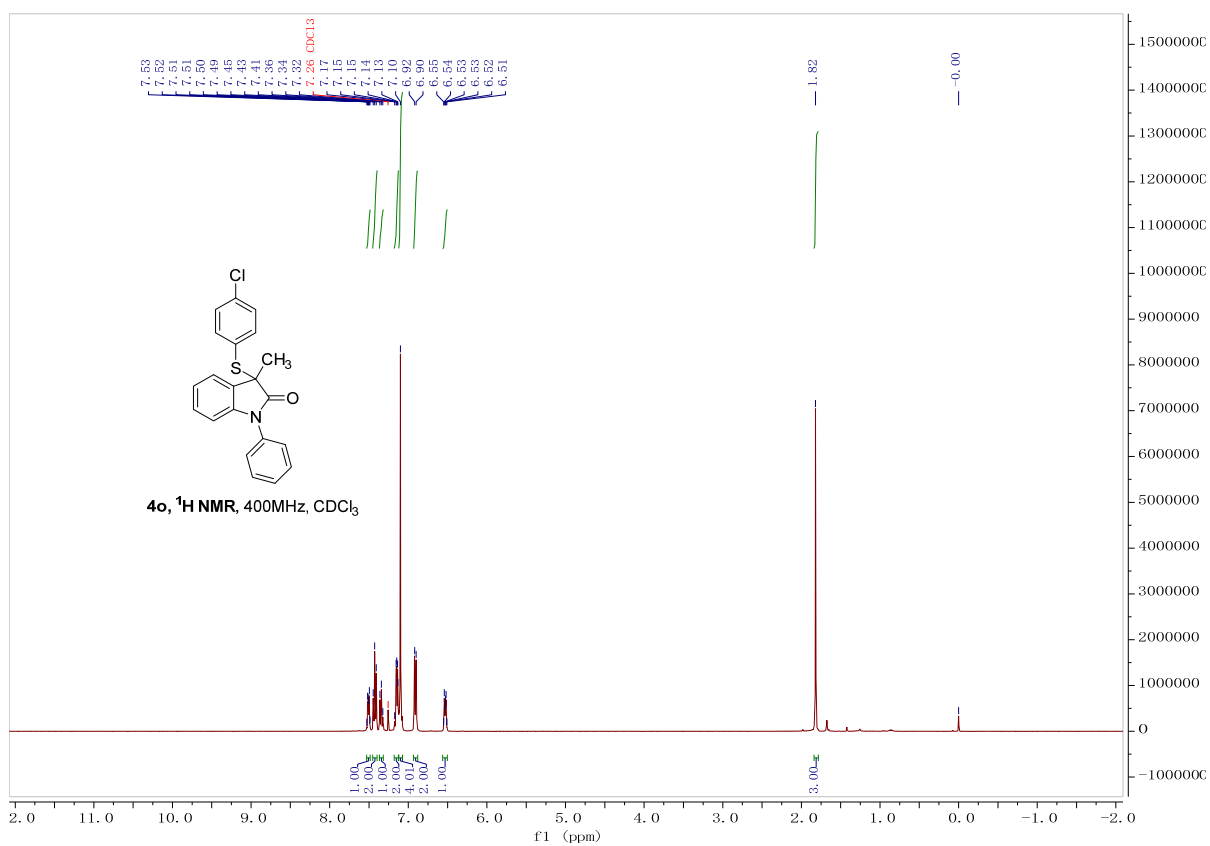

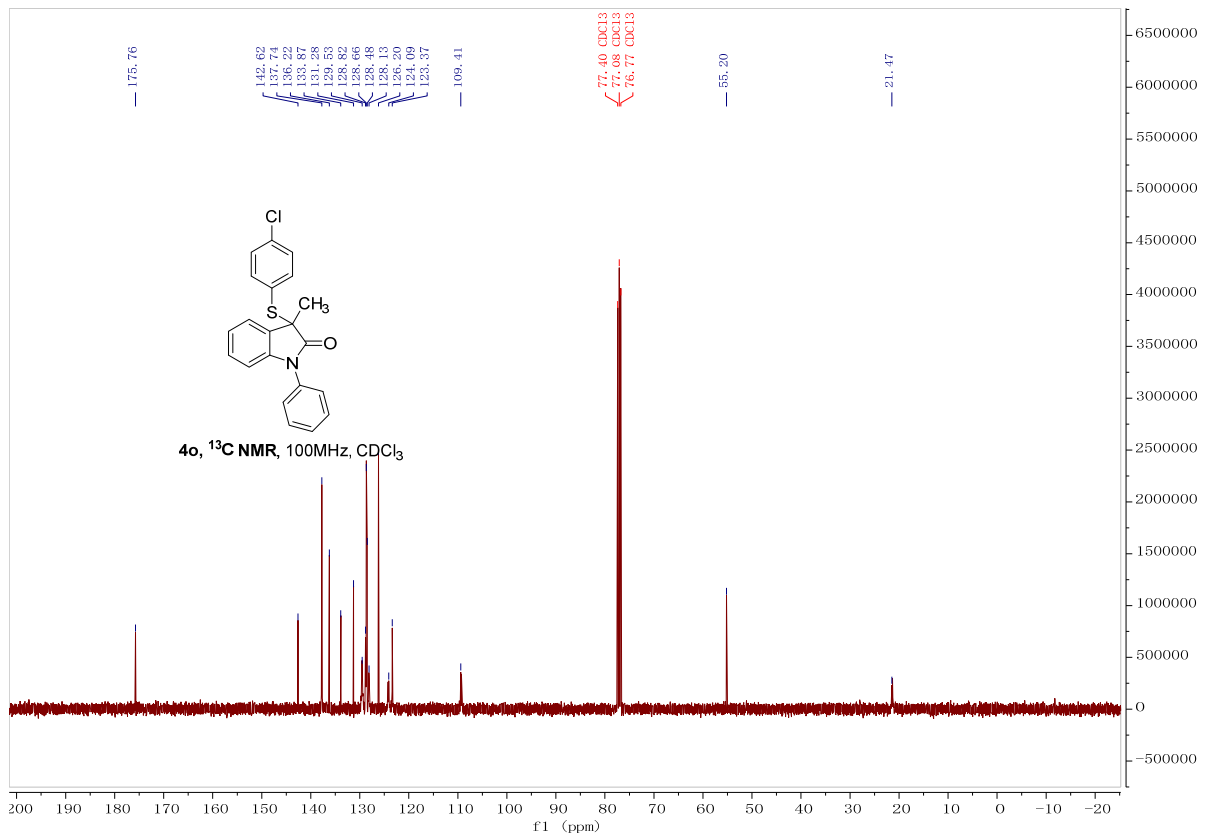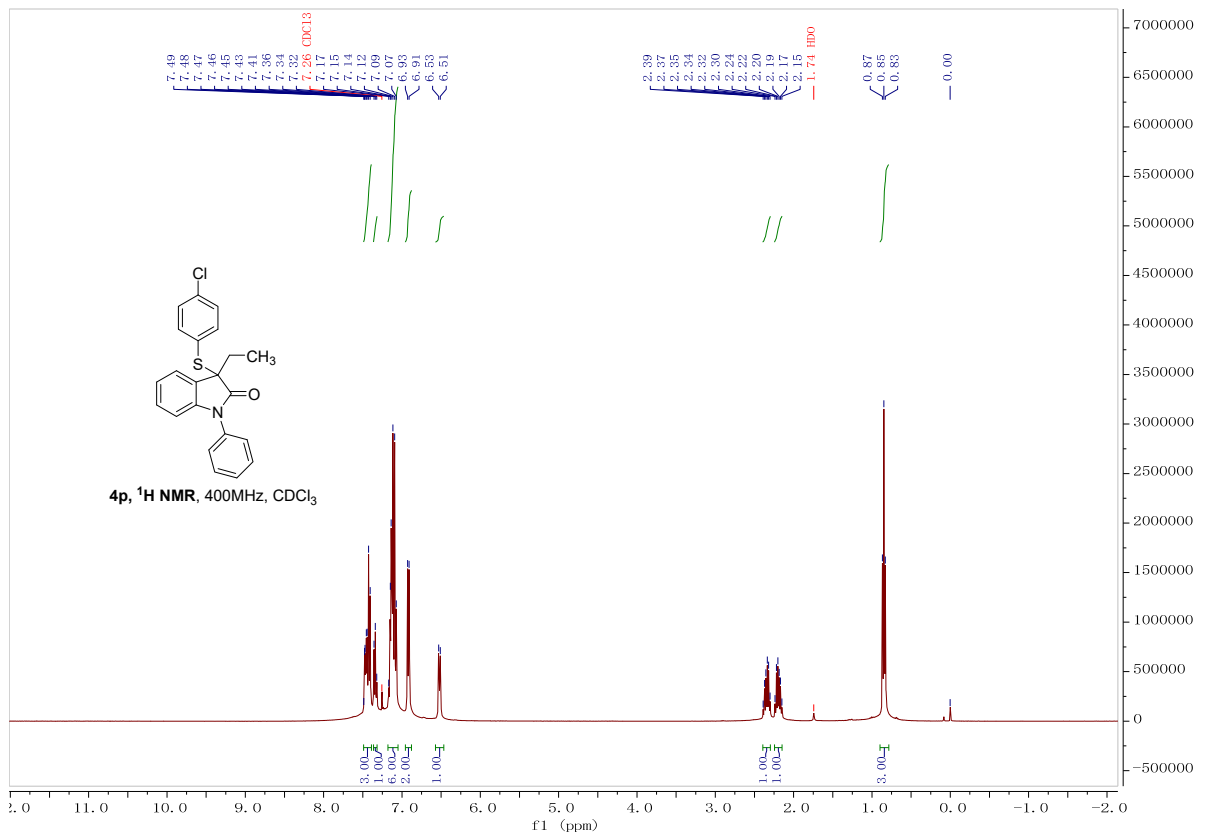



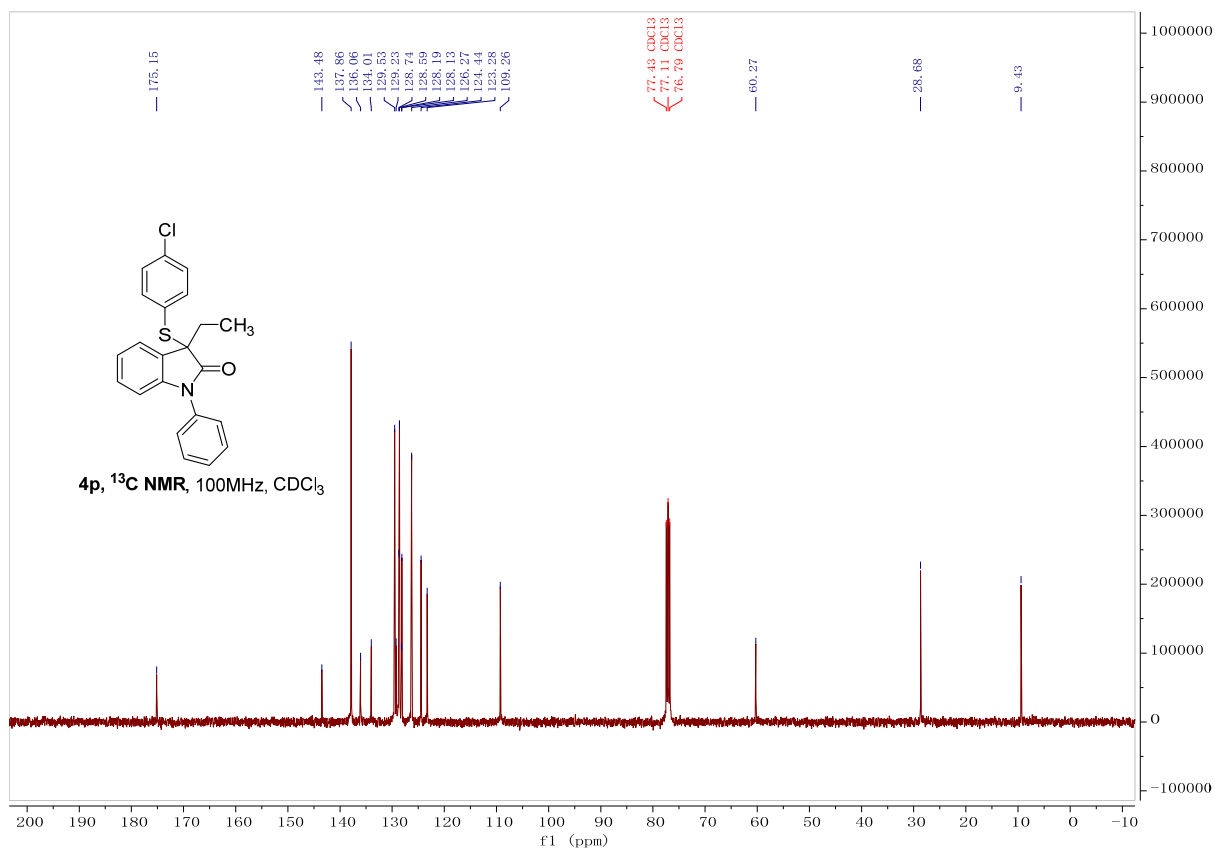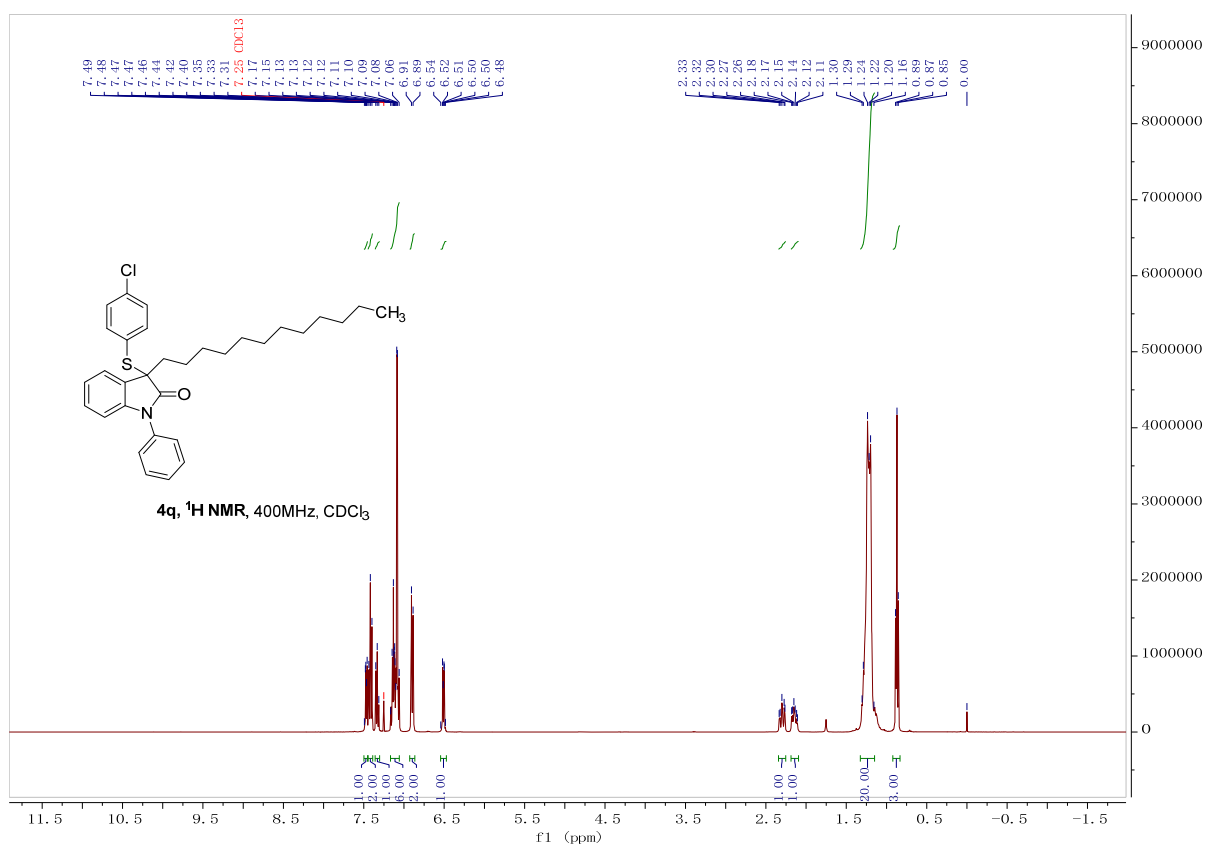

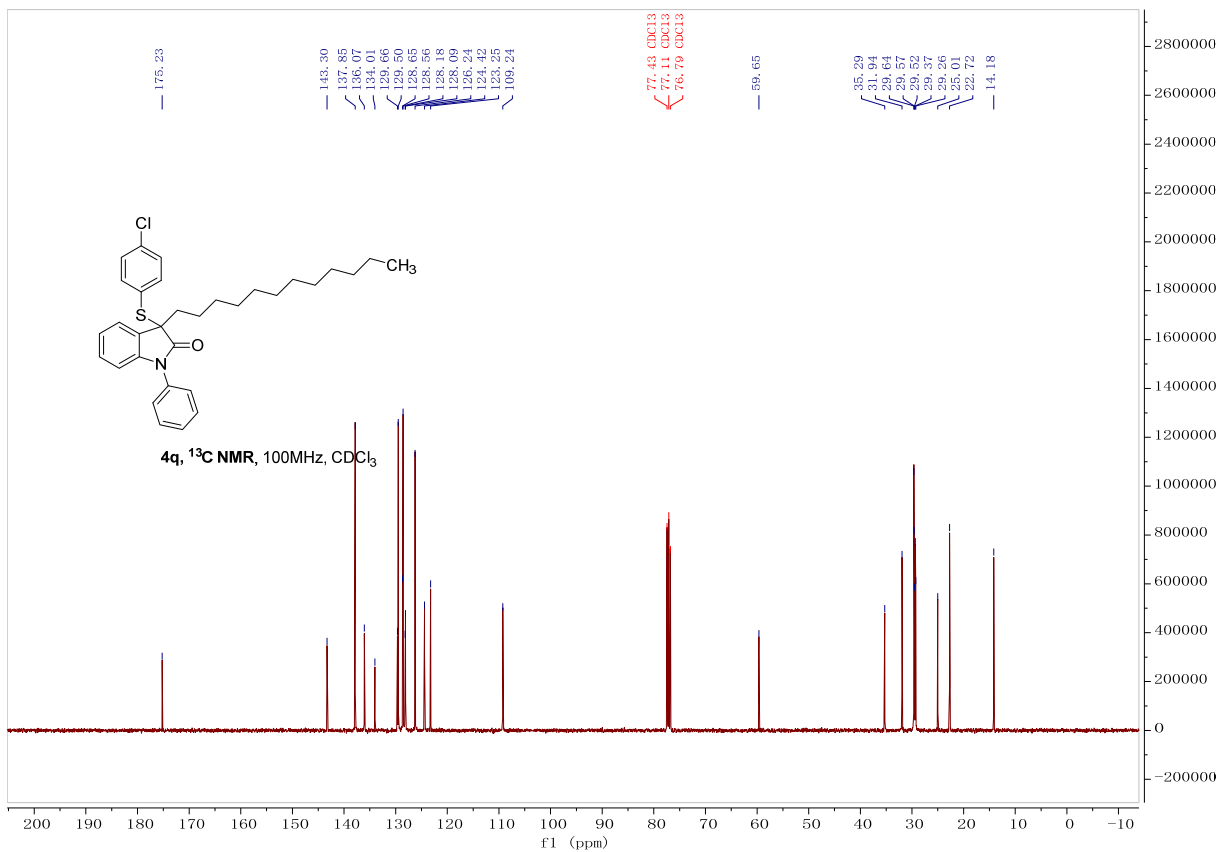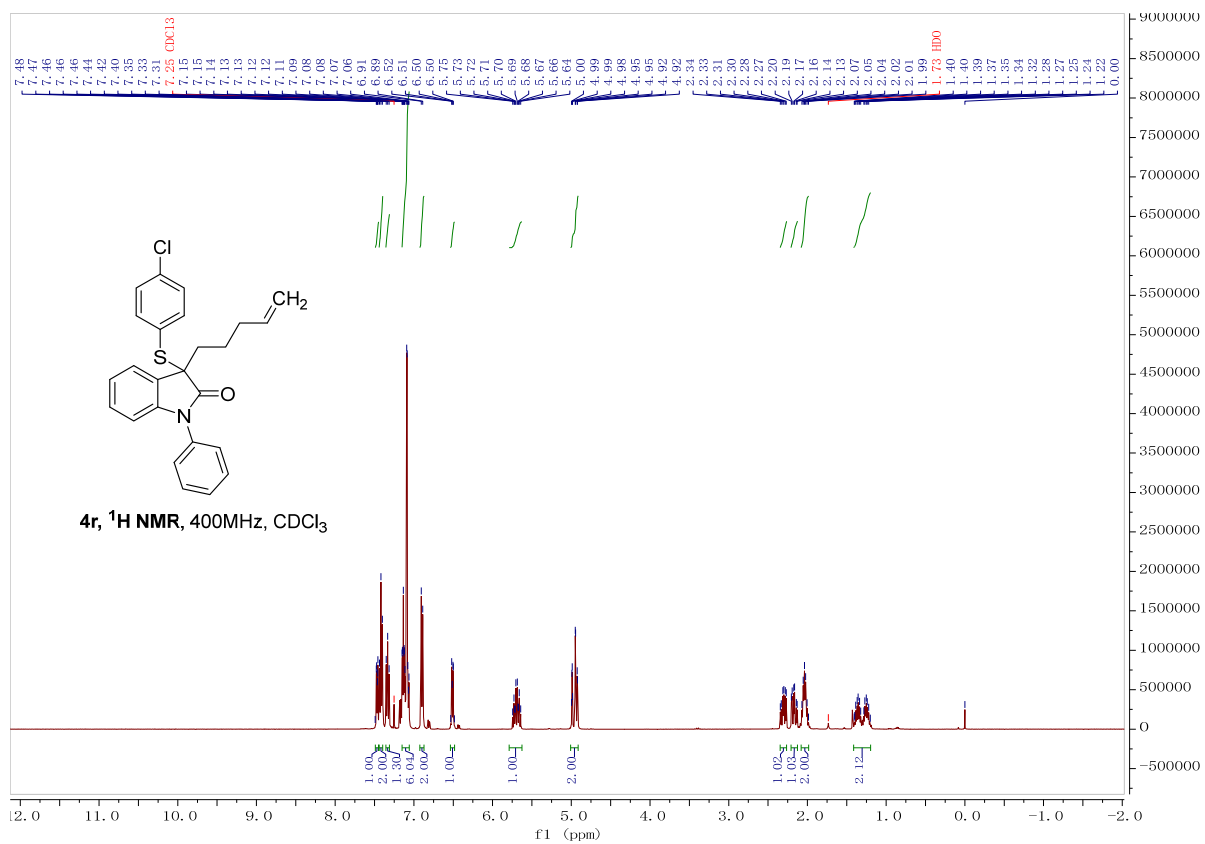

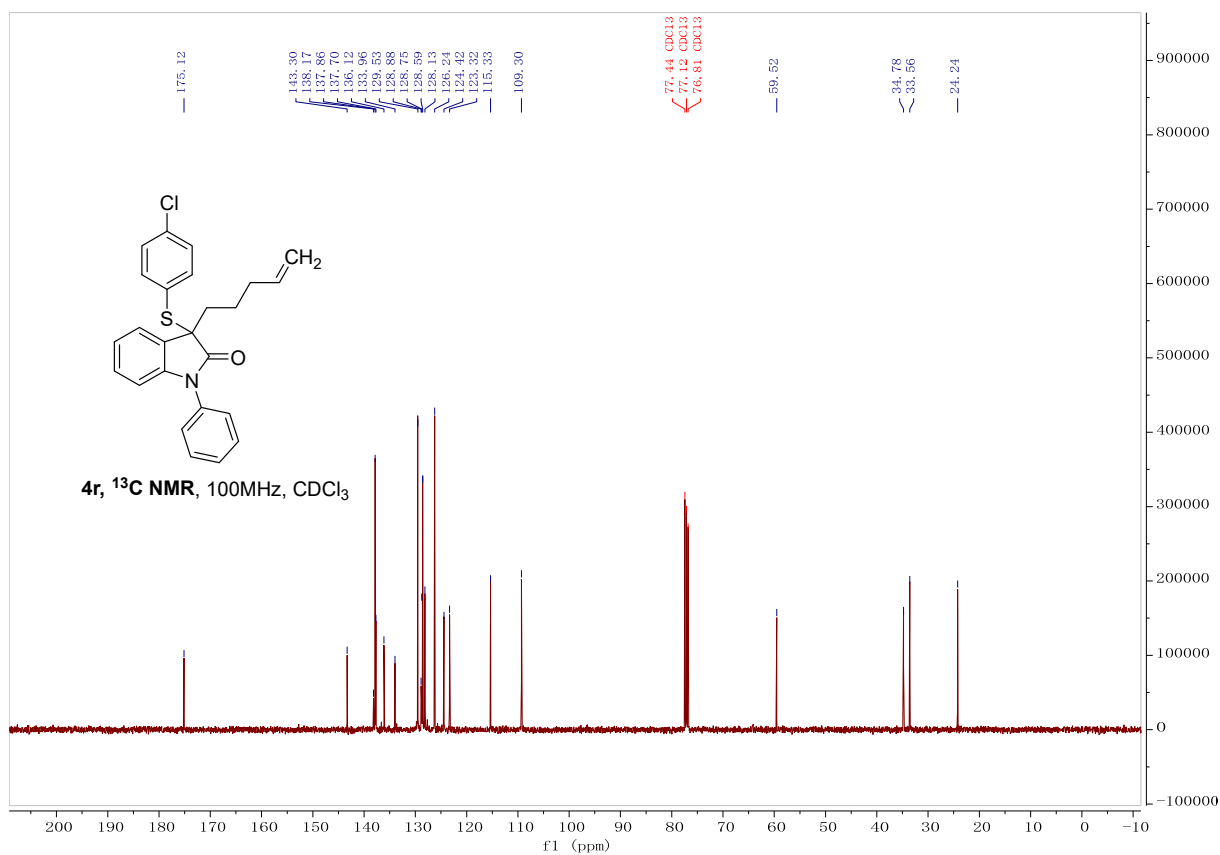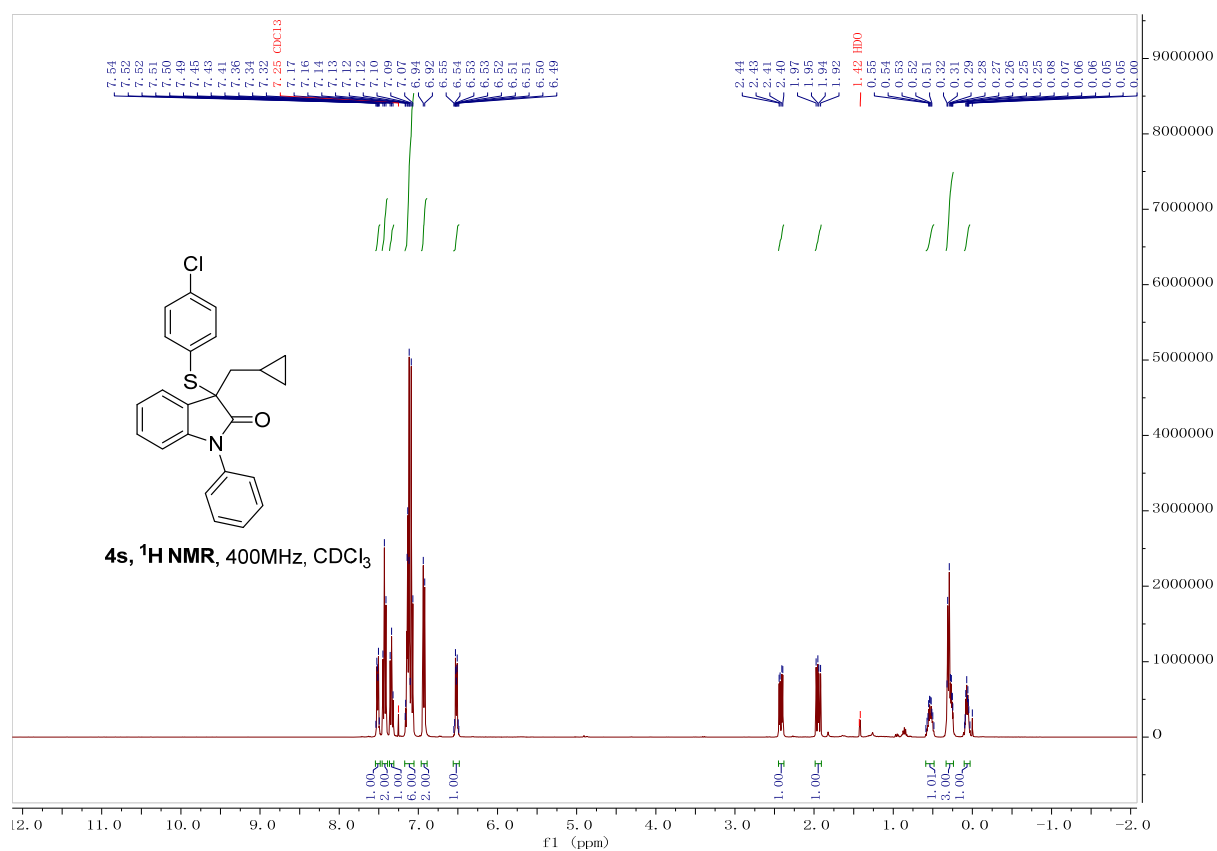

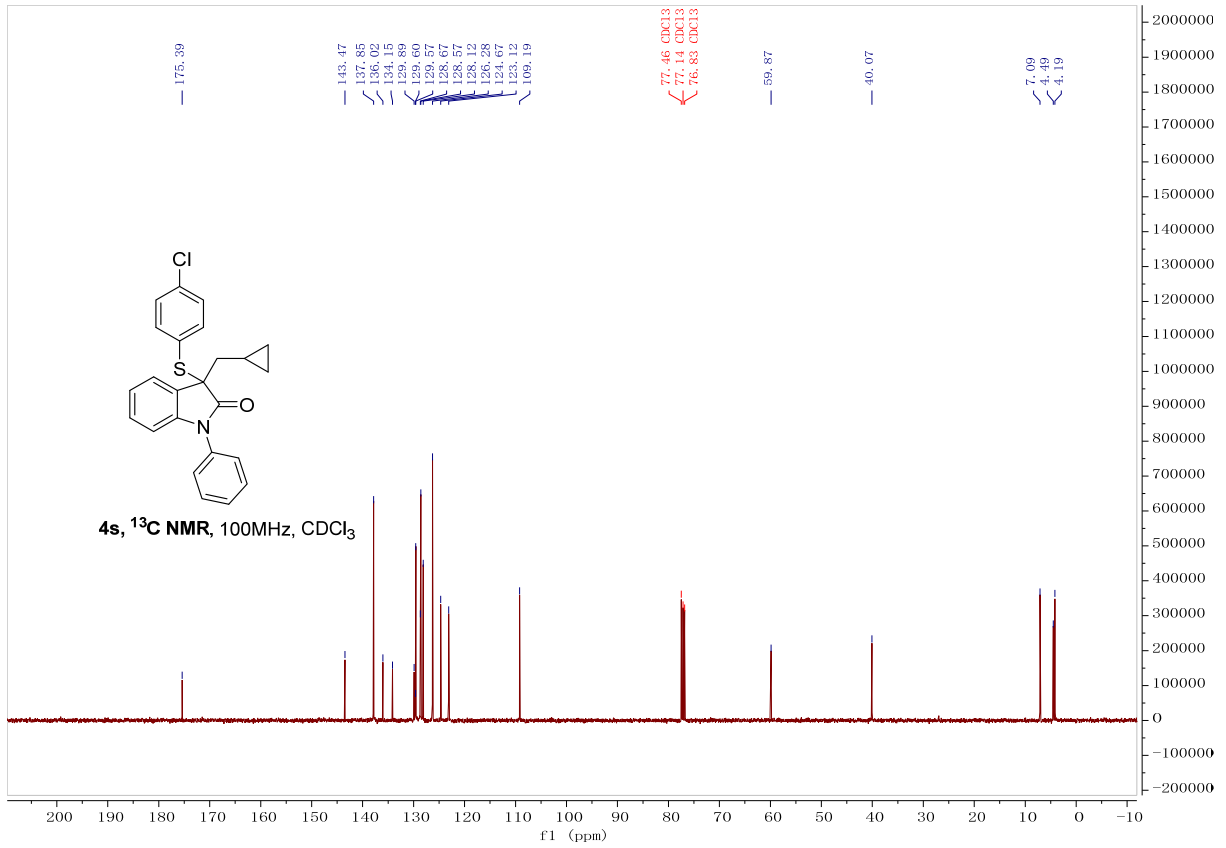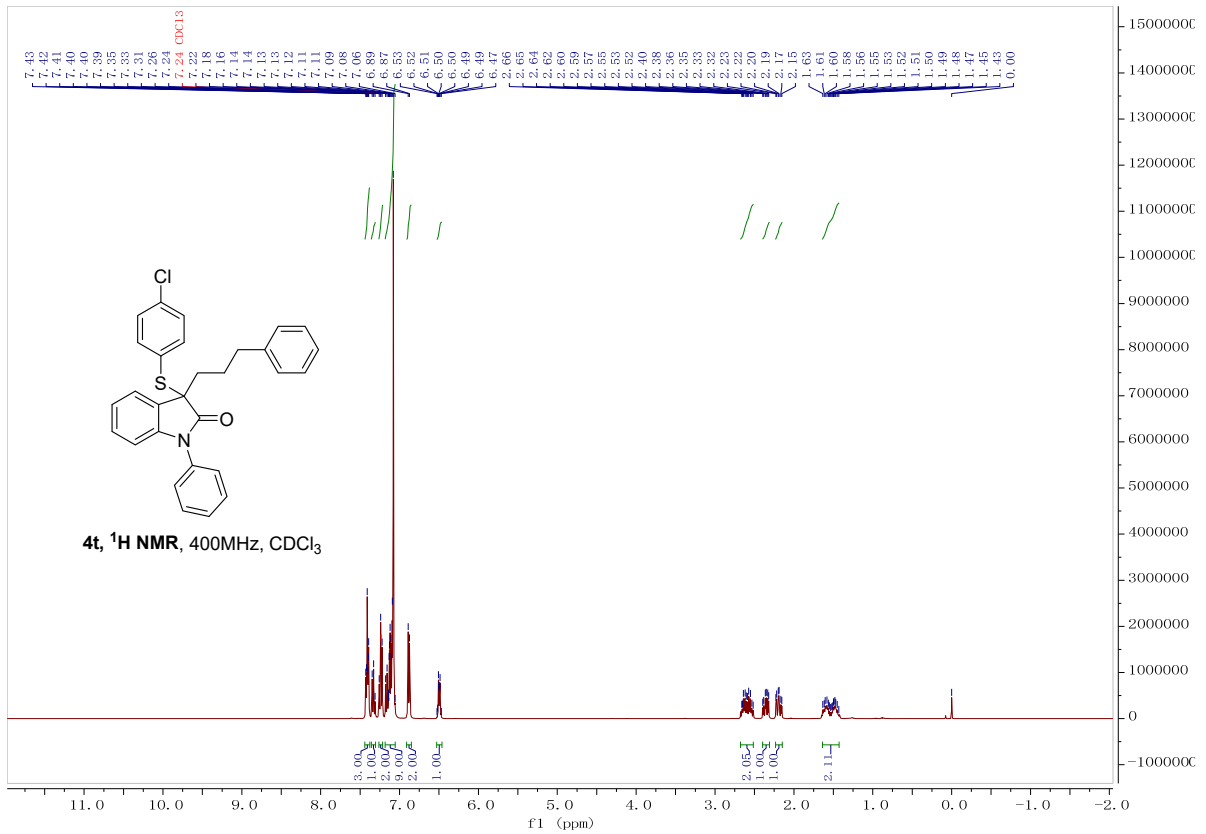

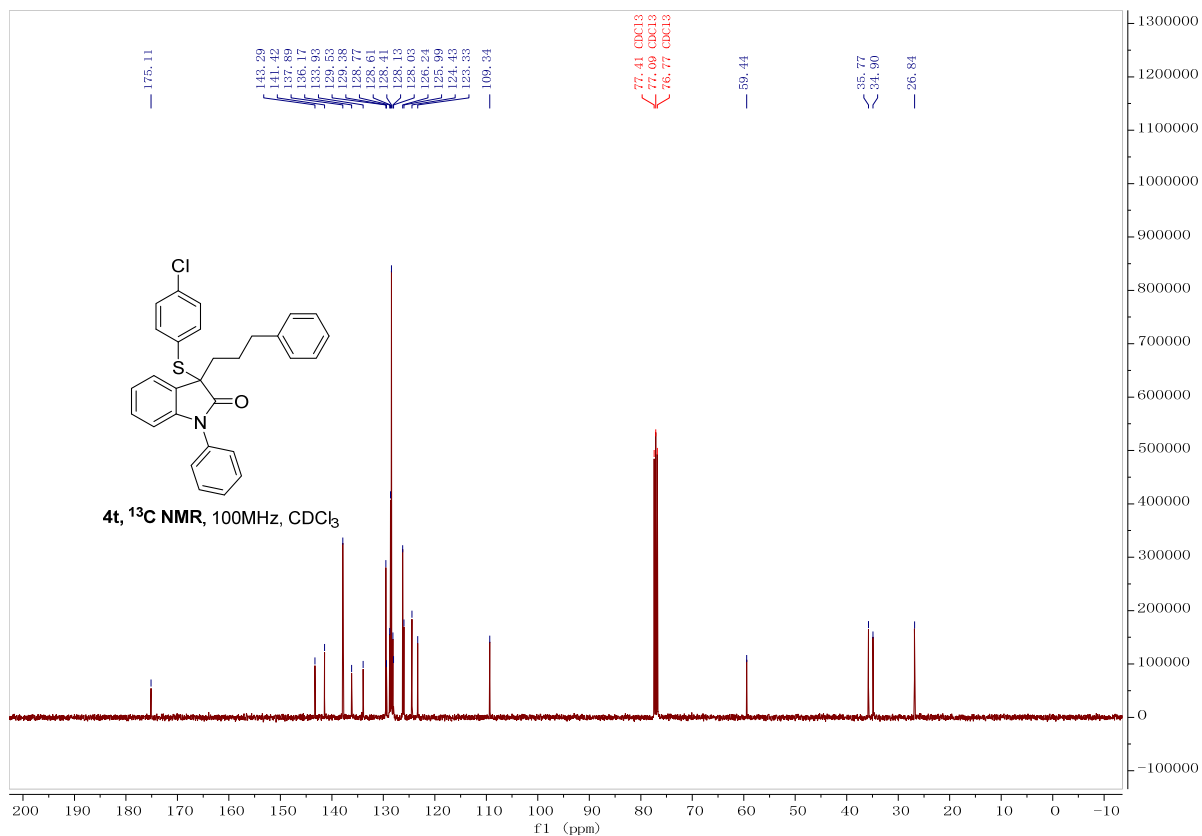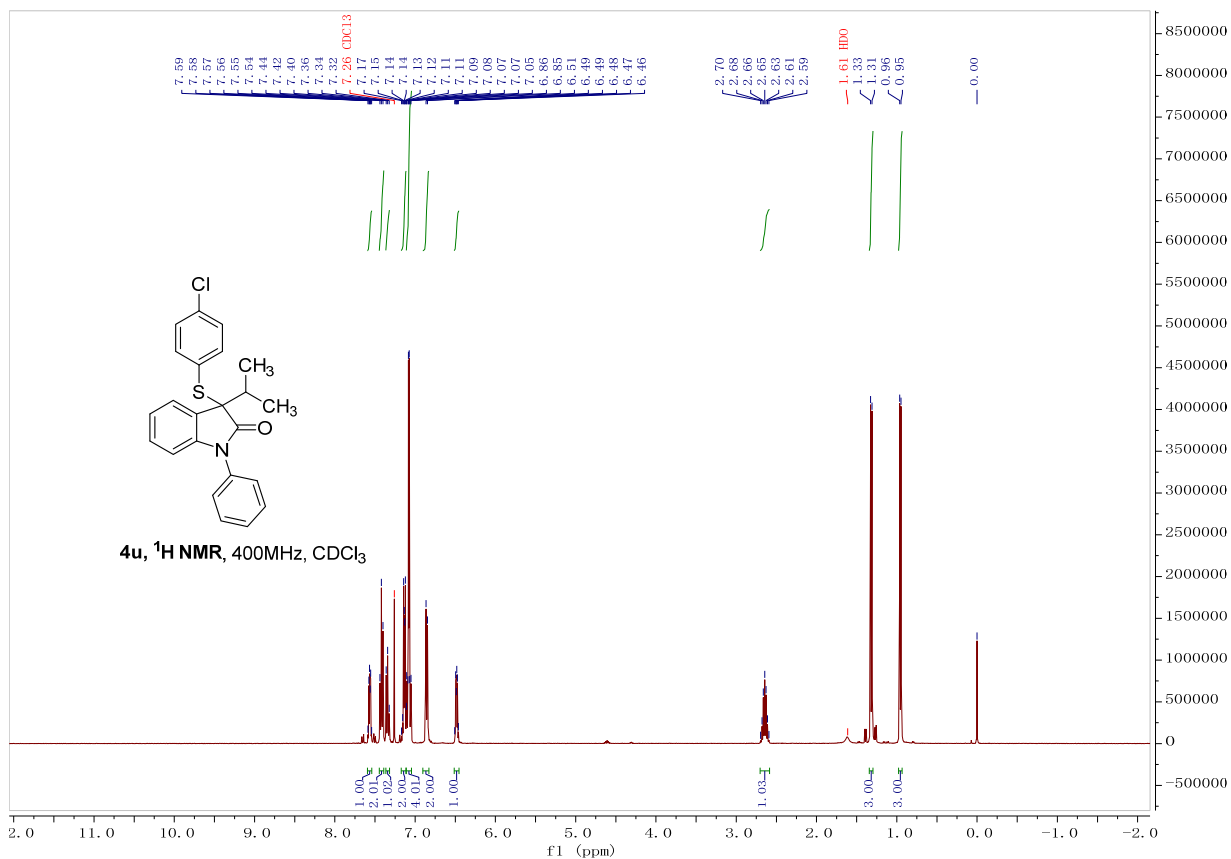

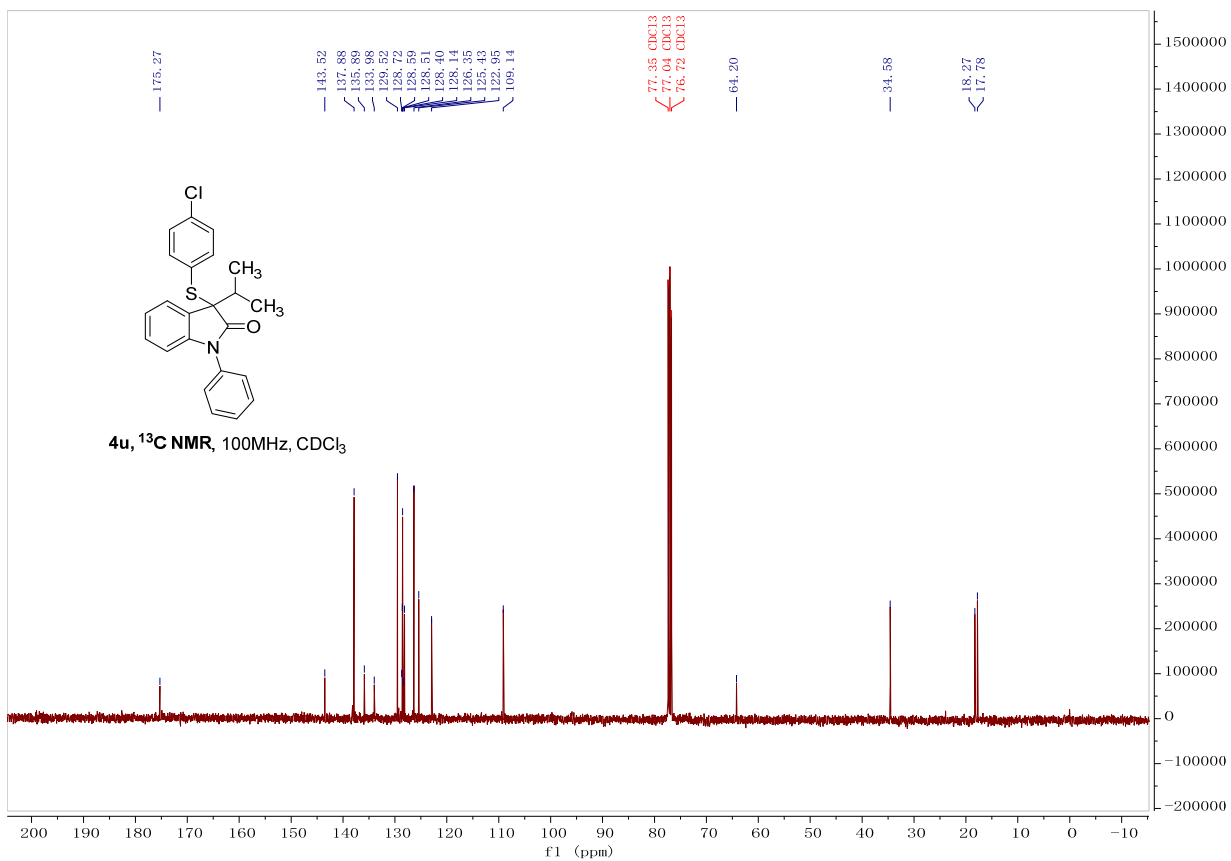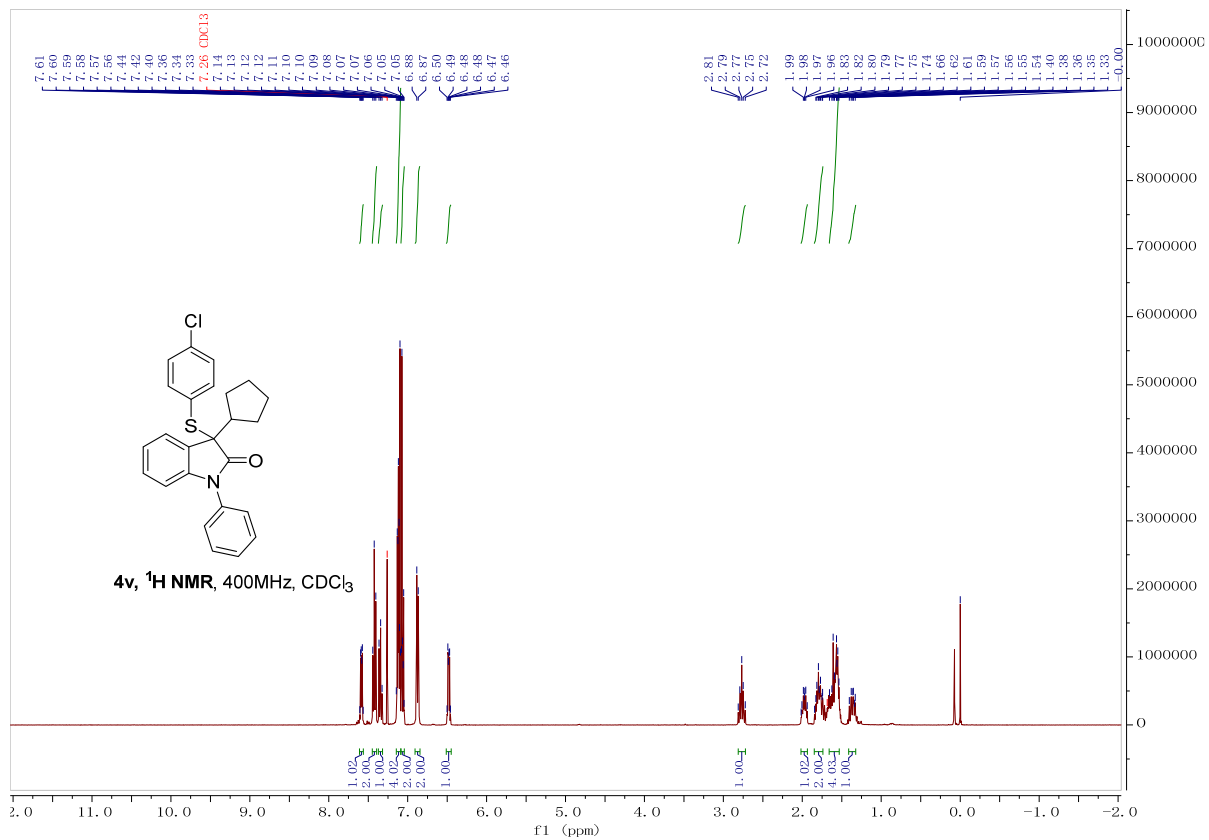

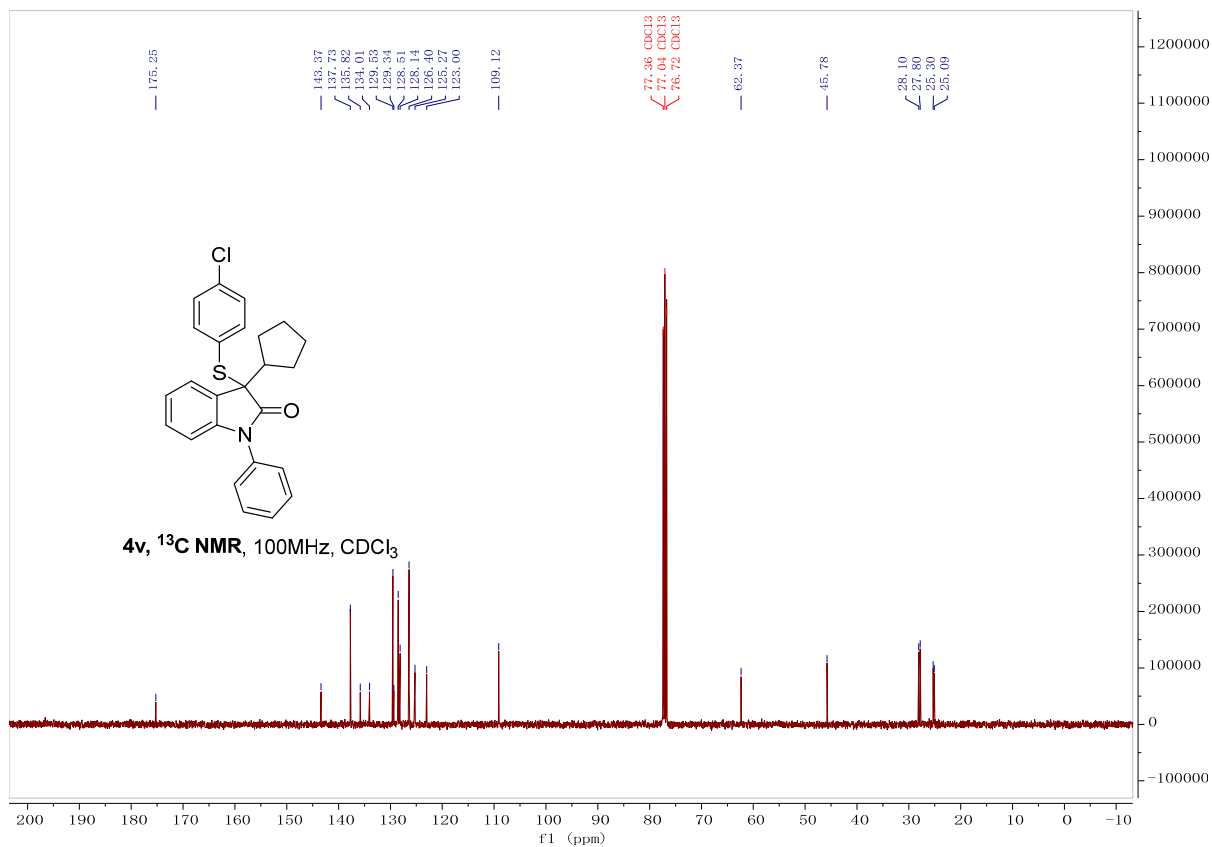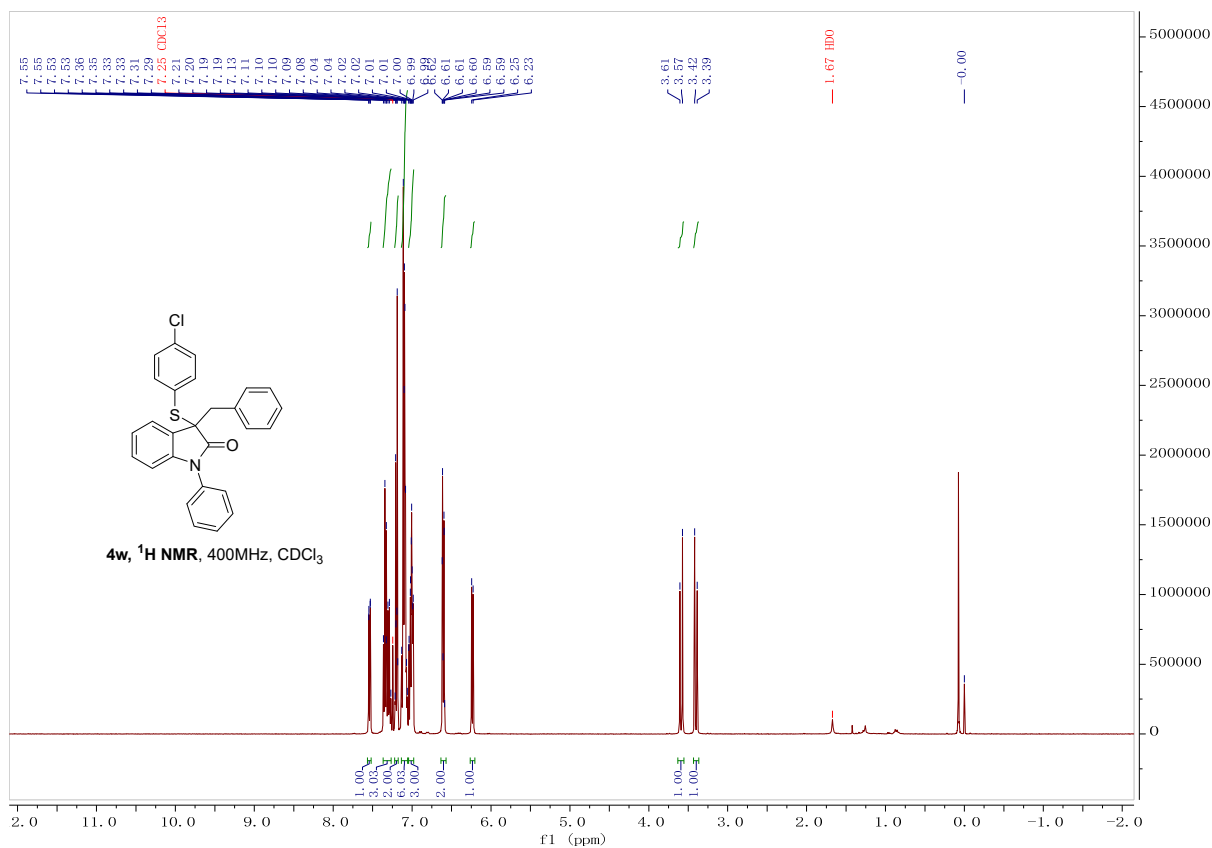

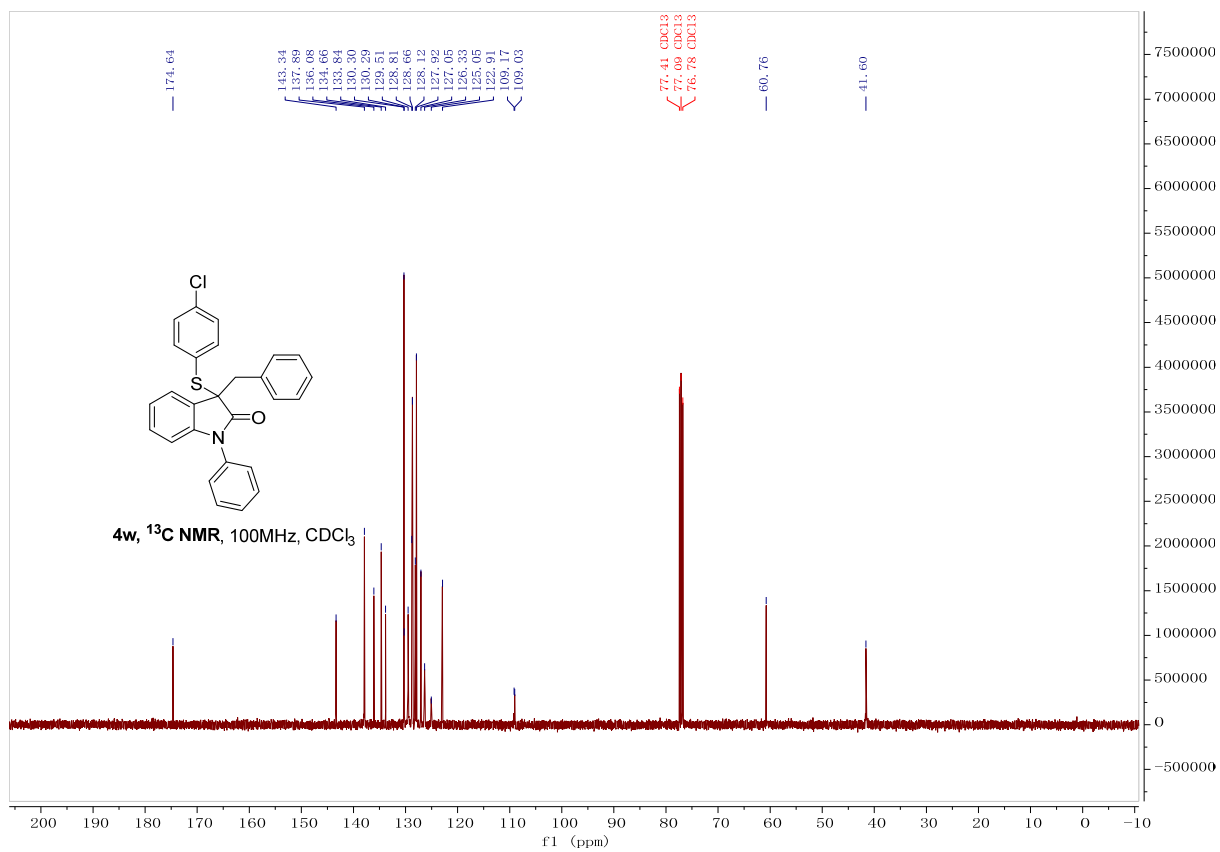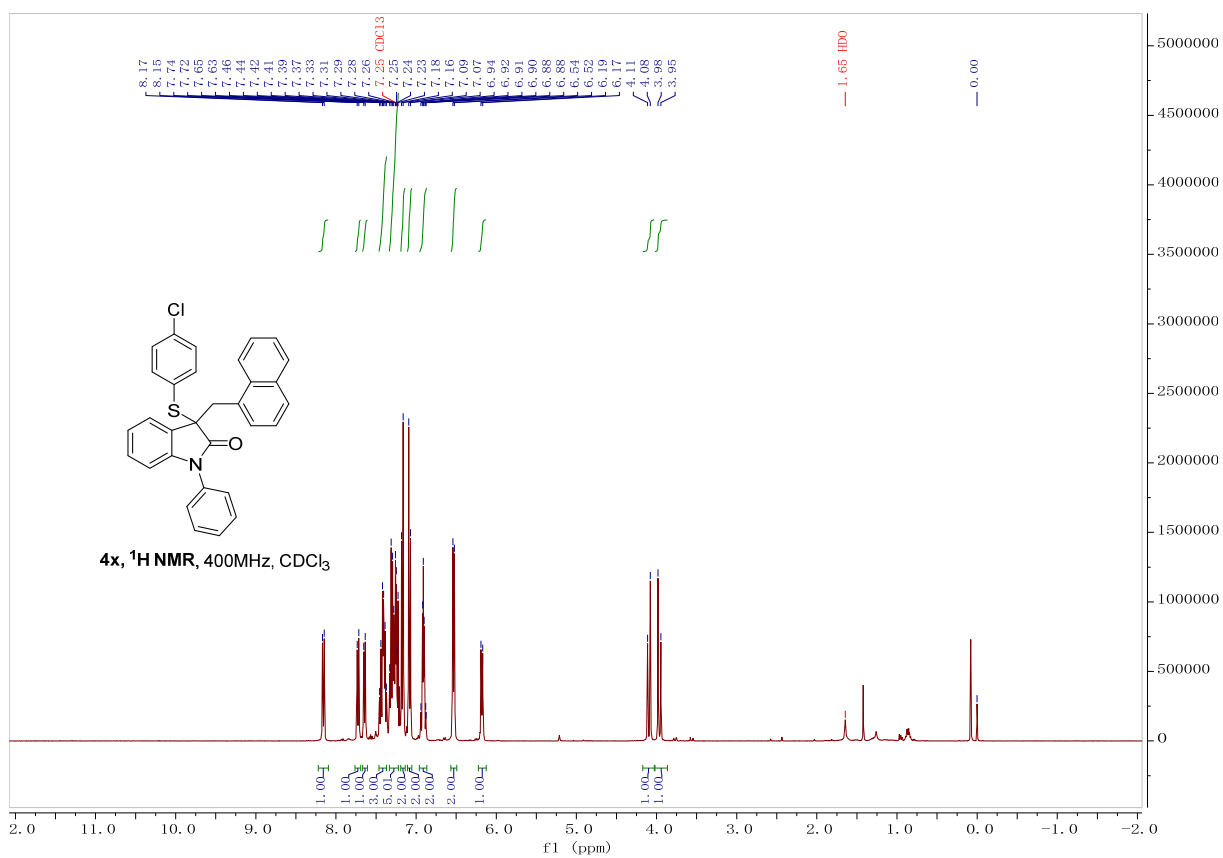



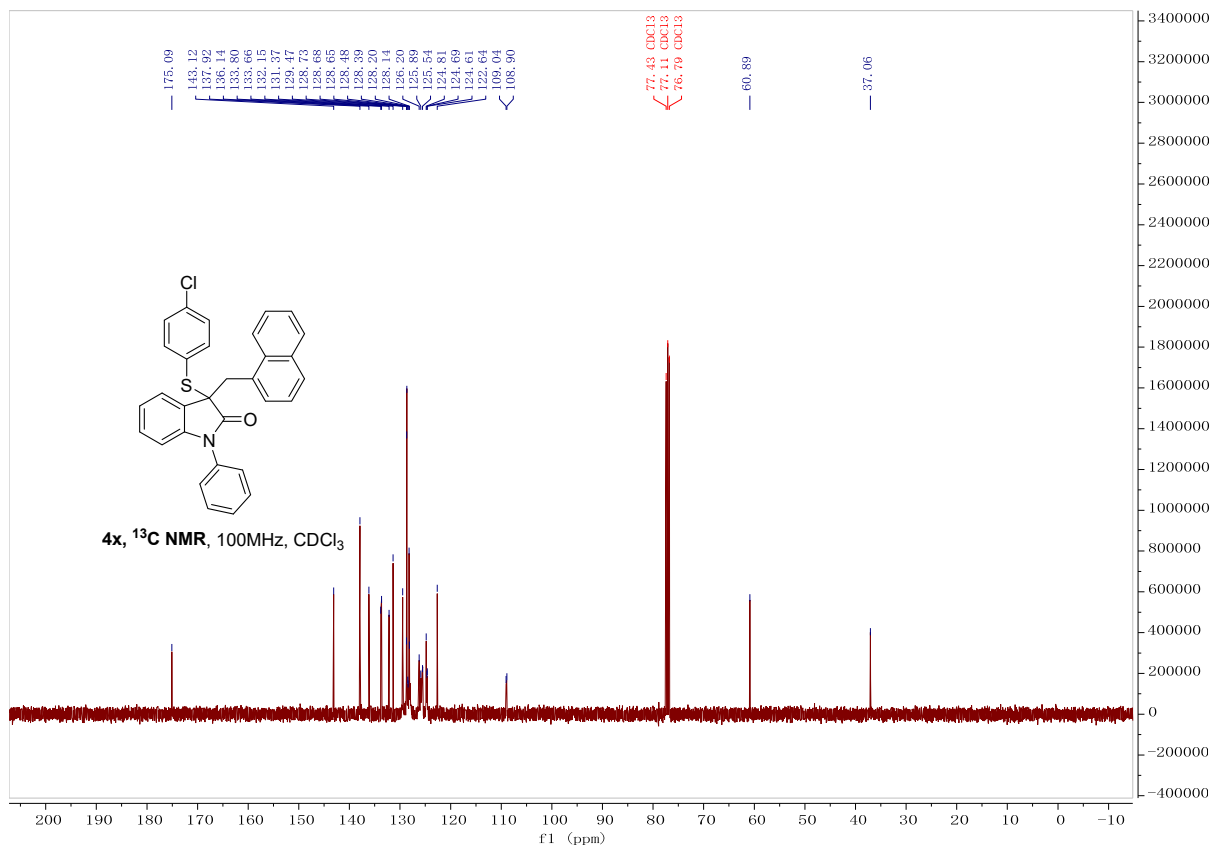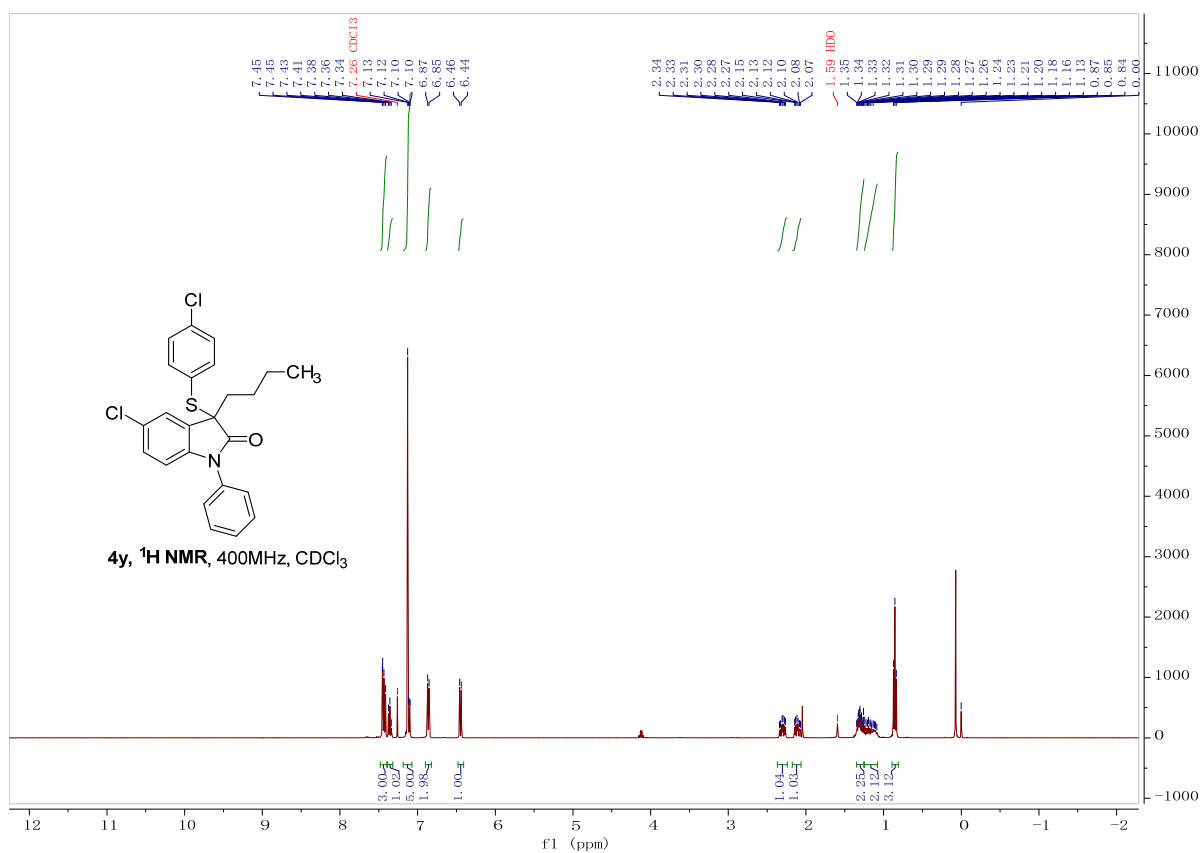

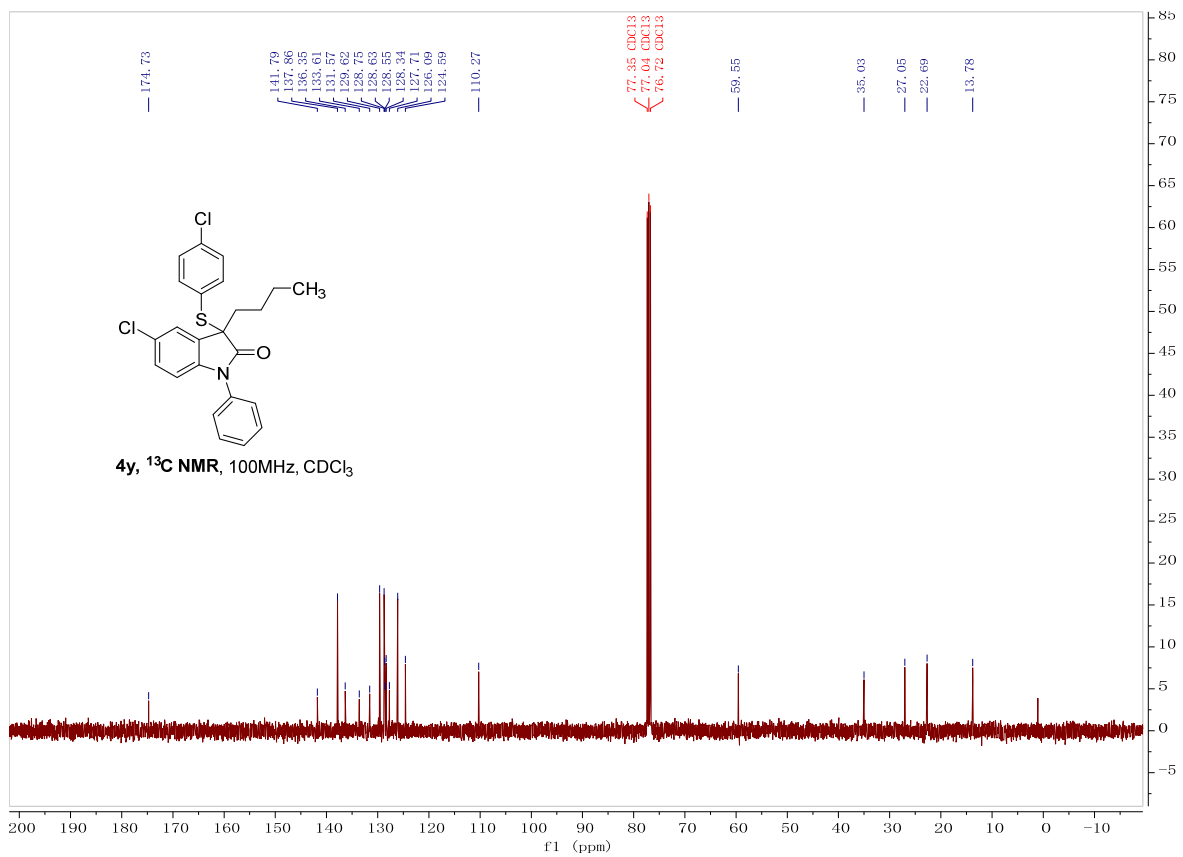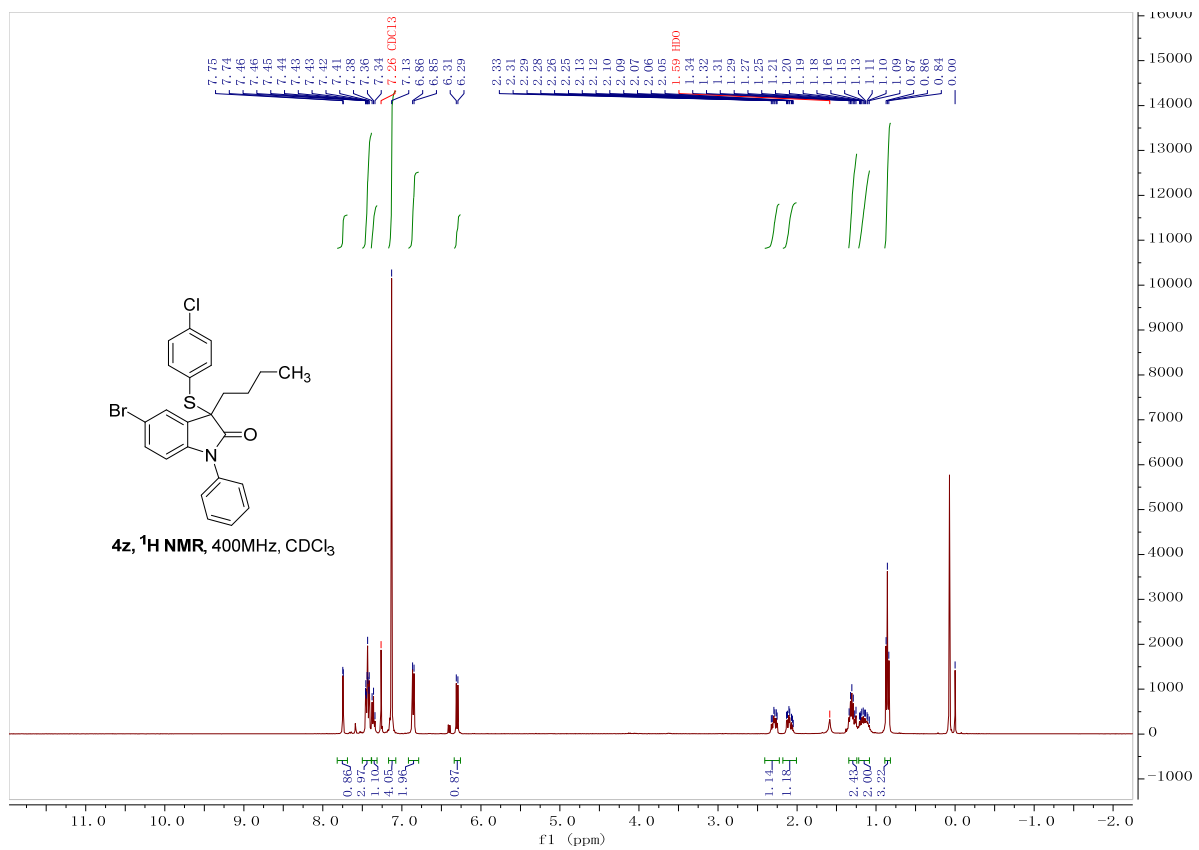

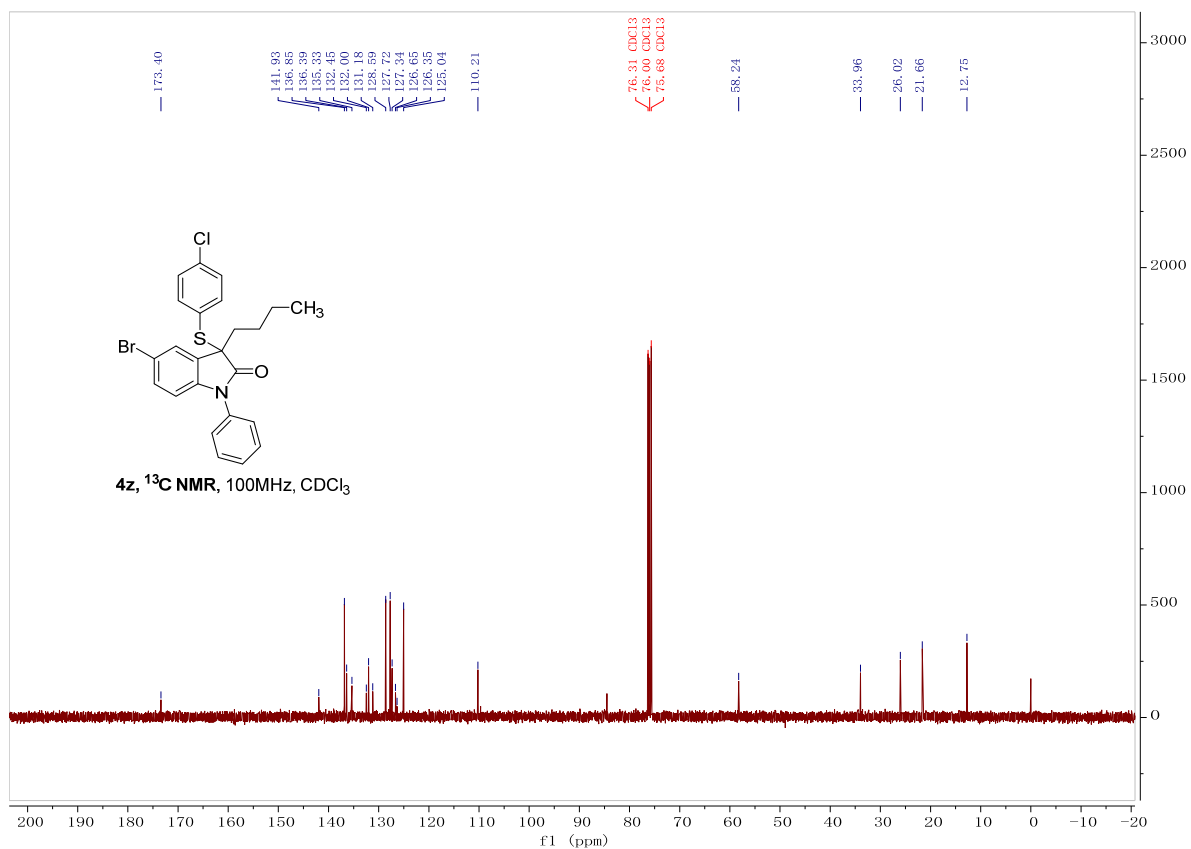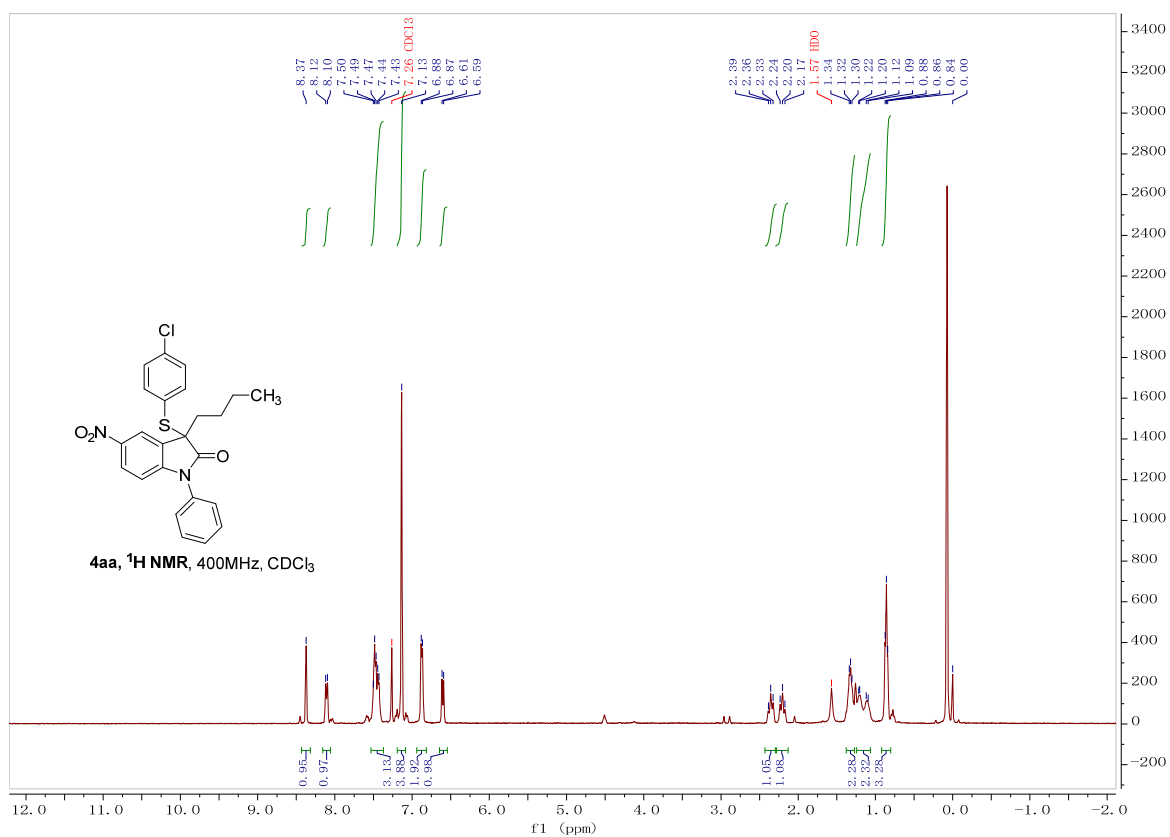

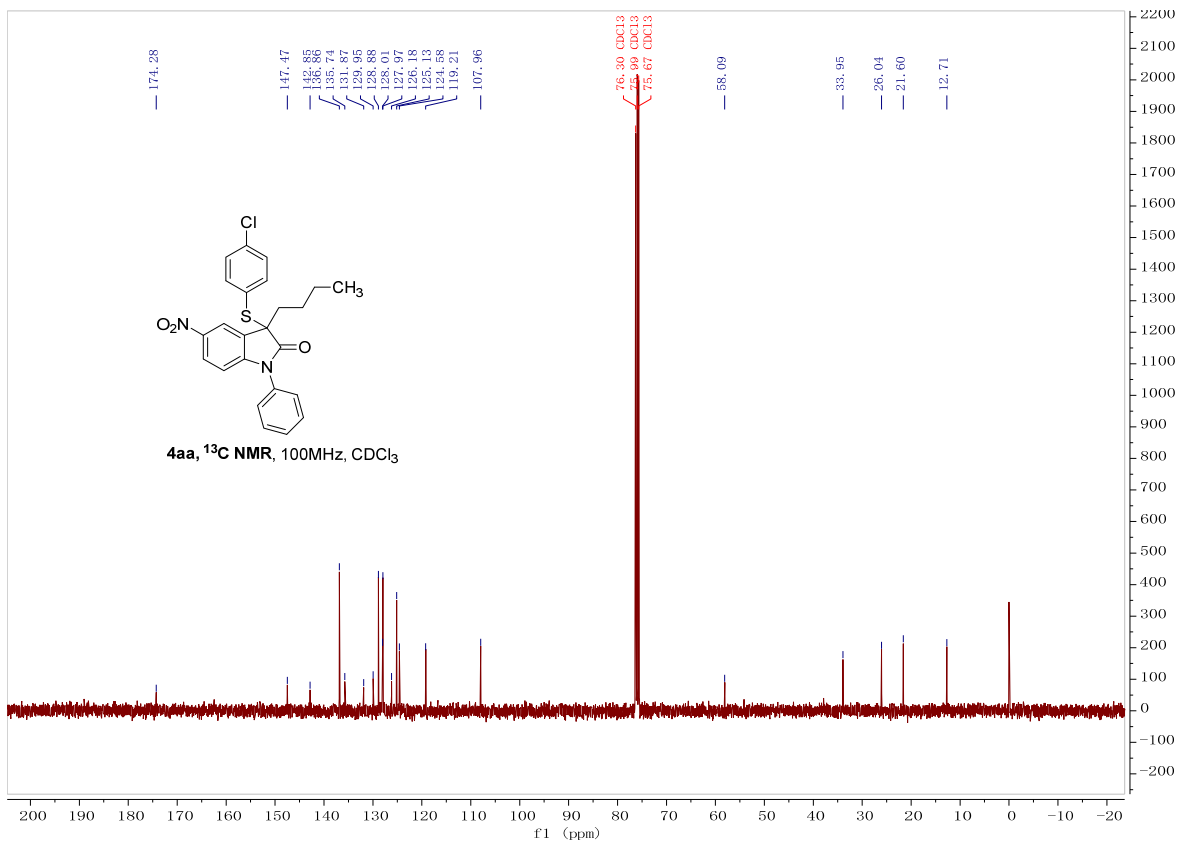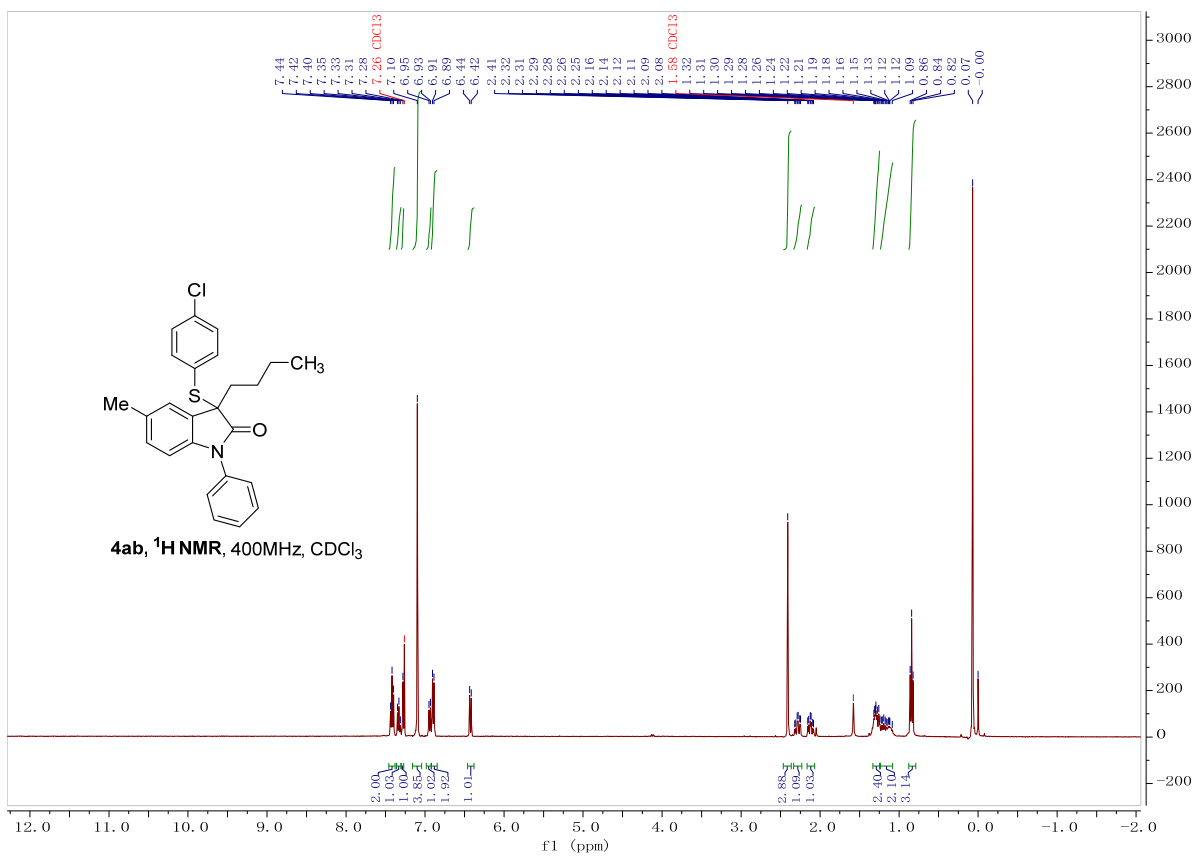

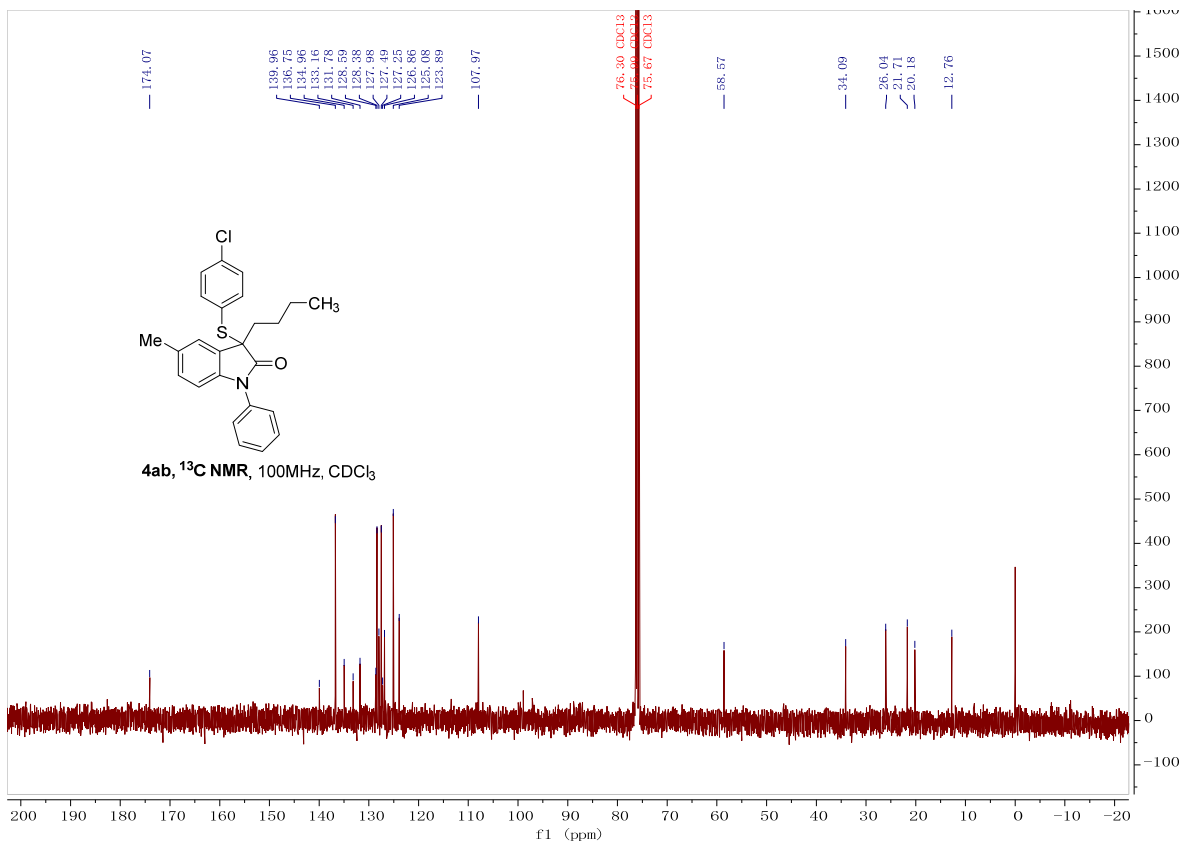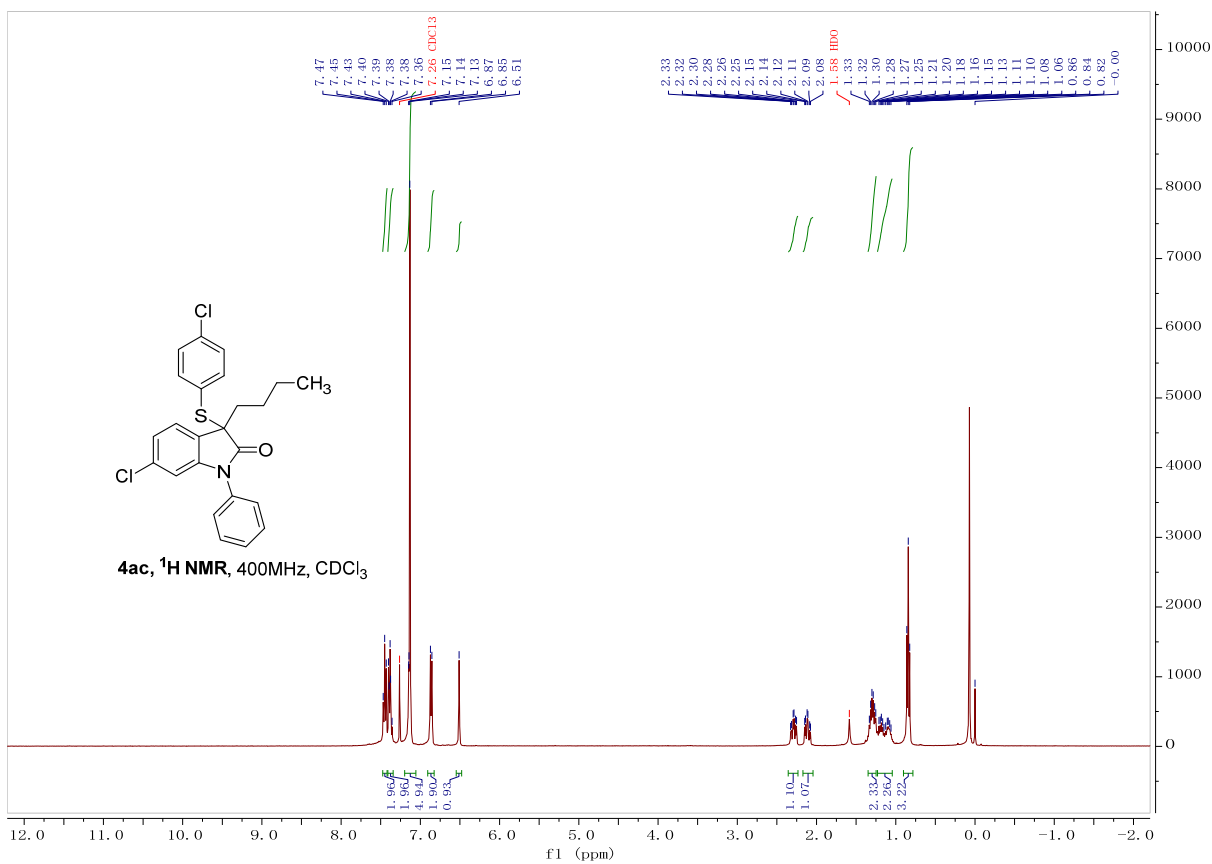

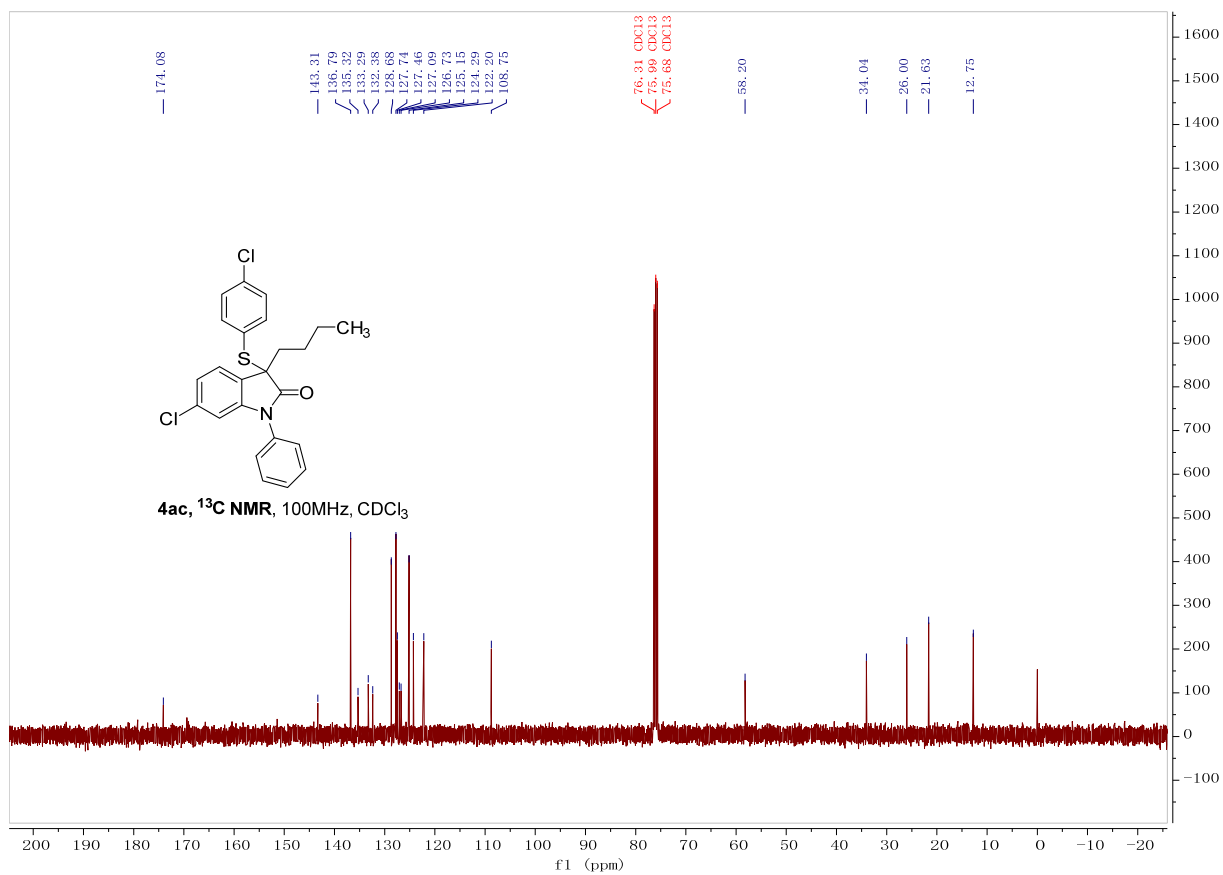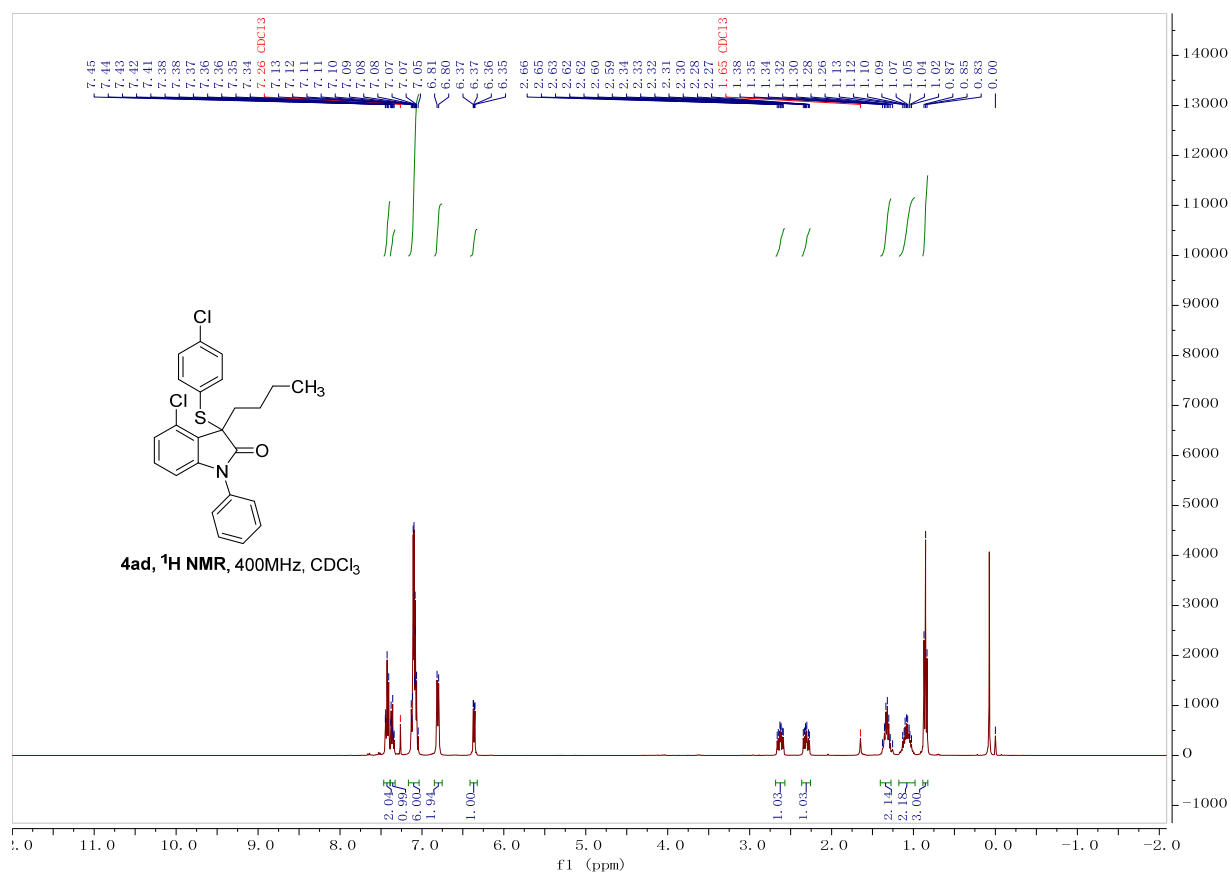

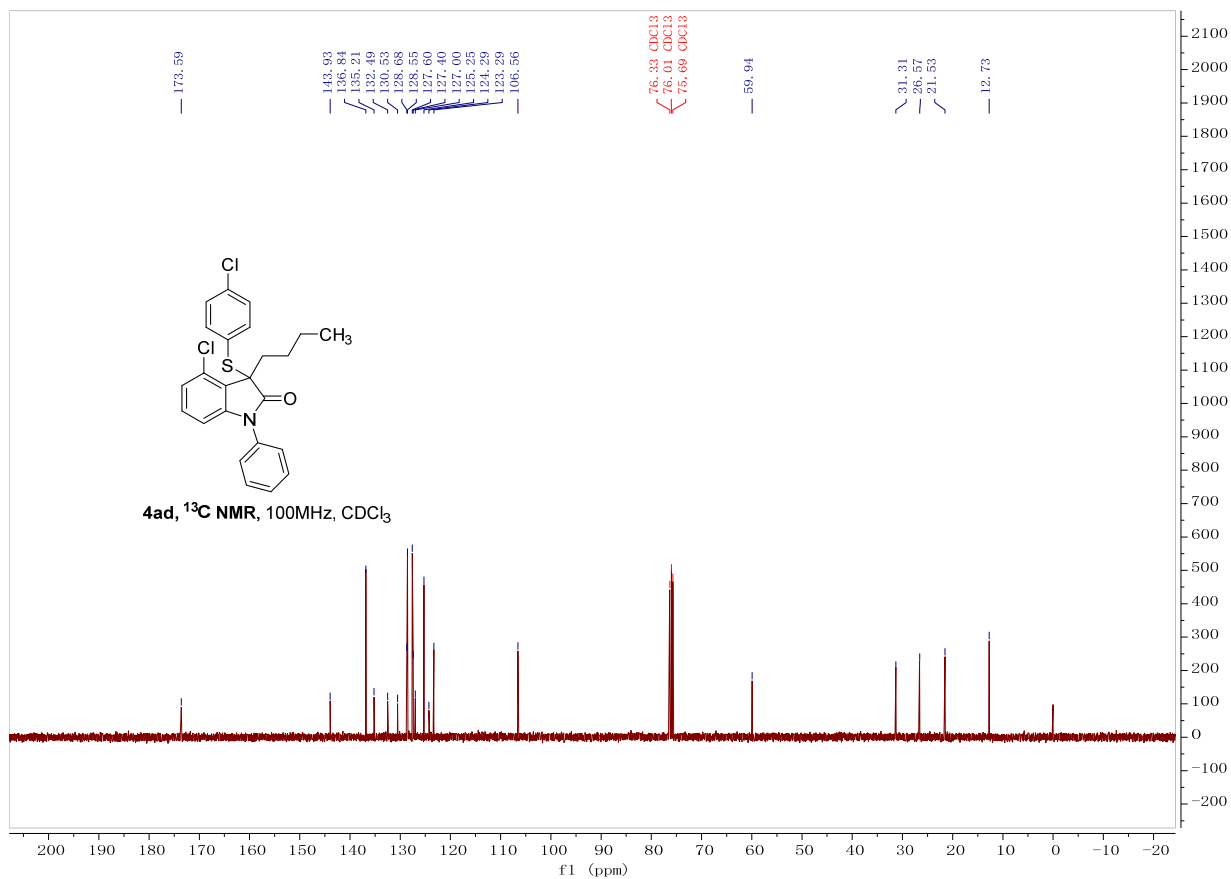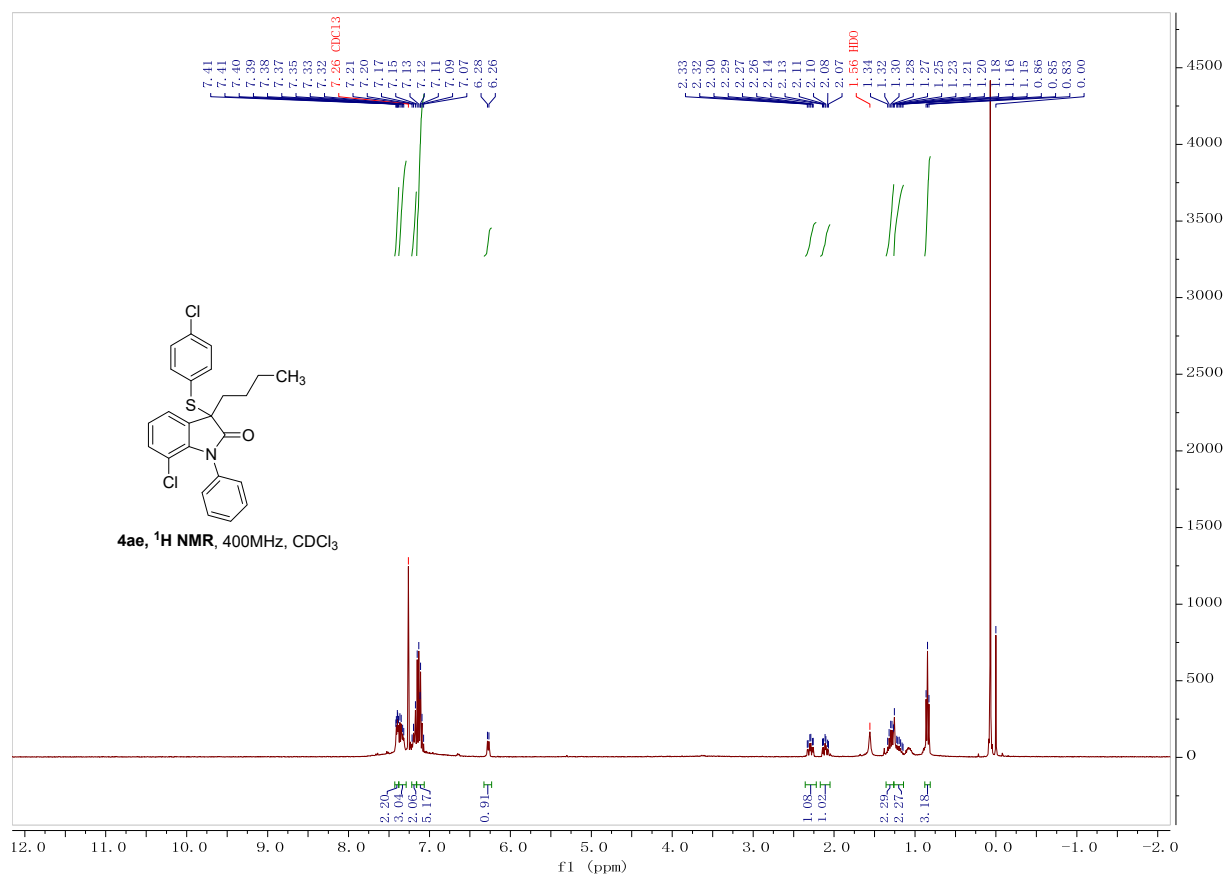

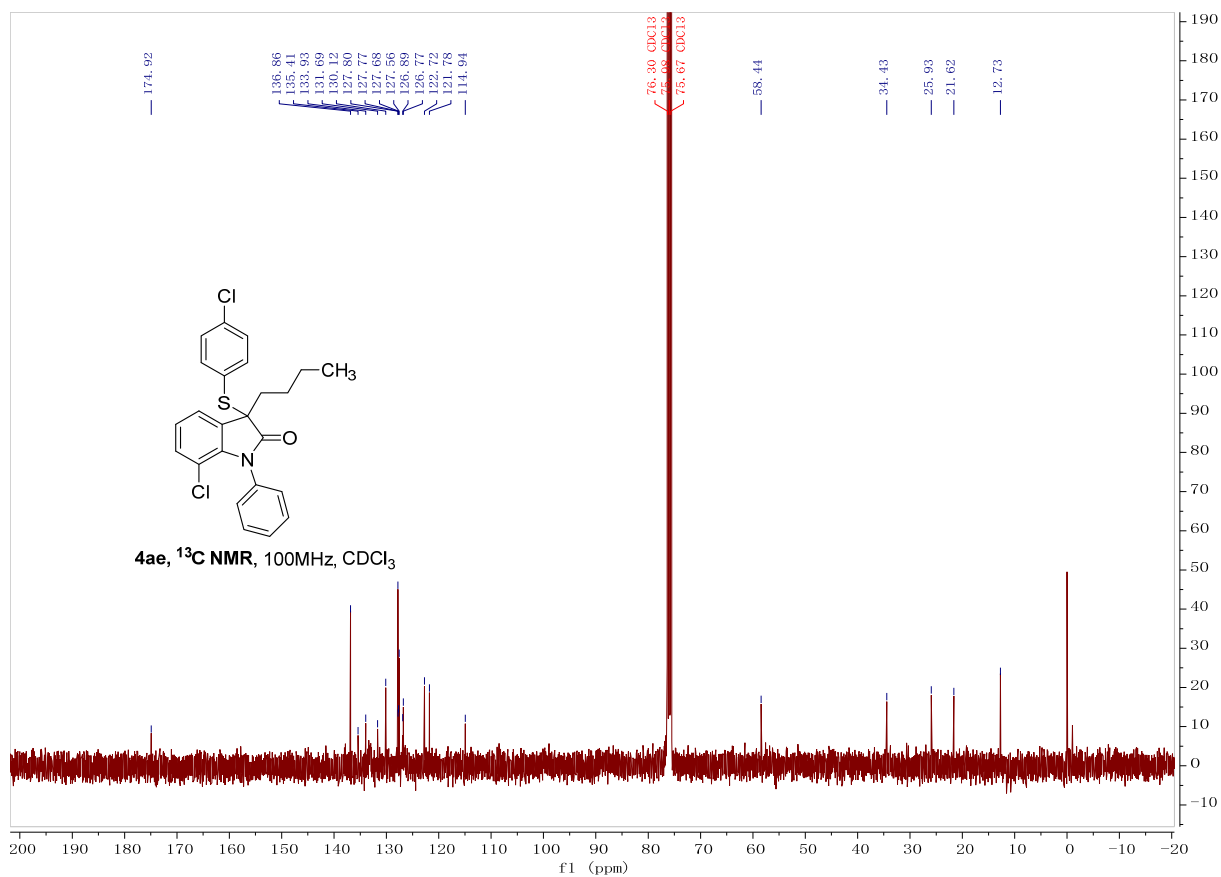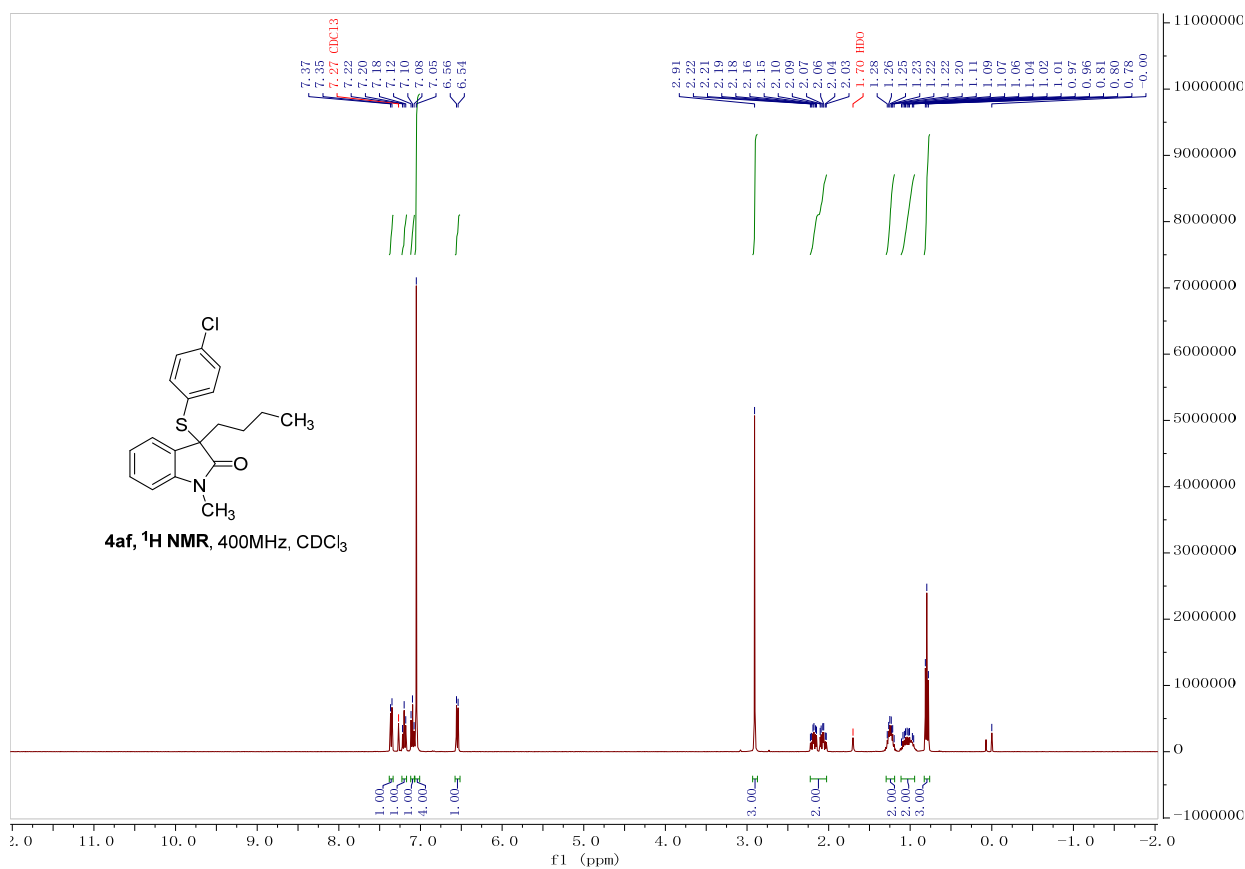



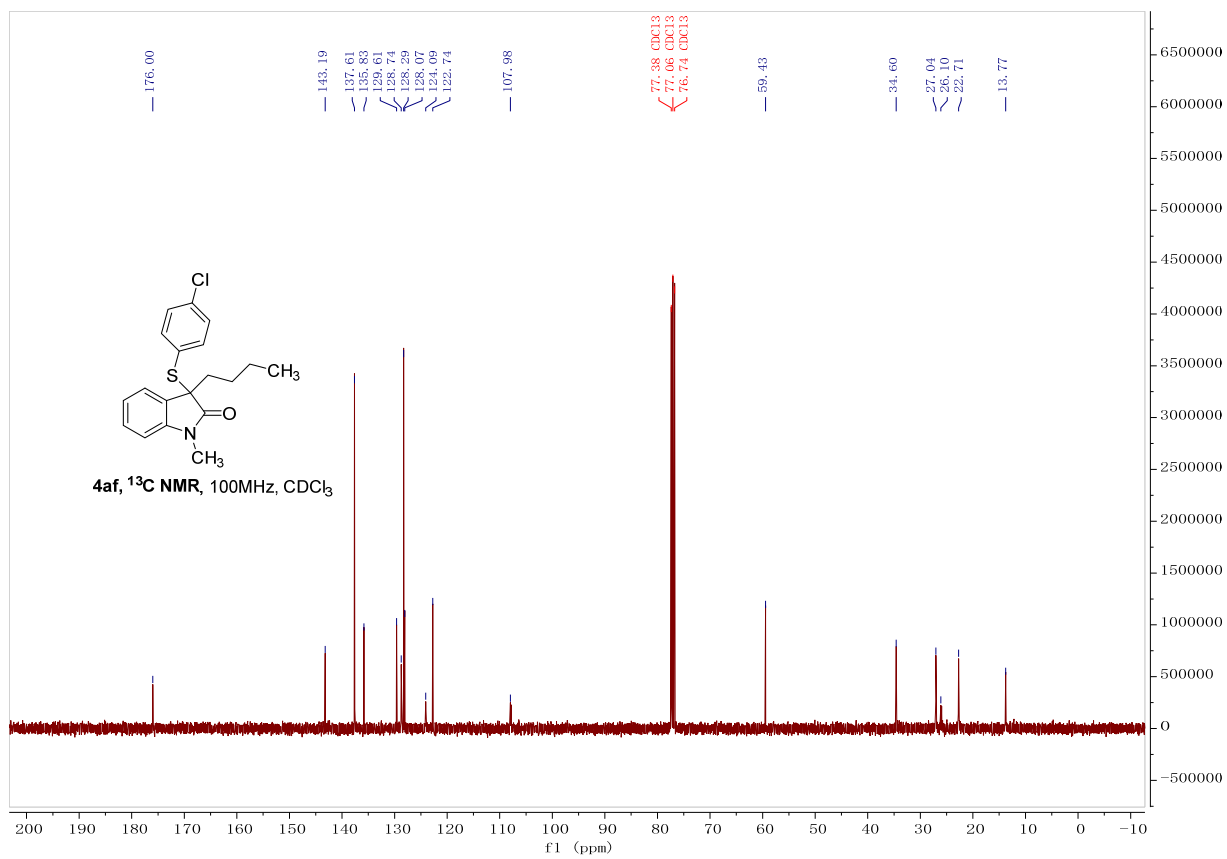

## 7. Spectroscopic data for compounds 5-8

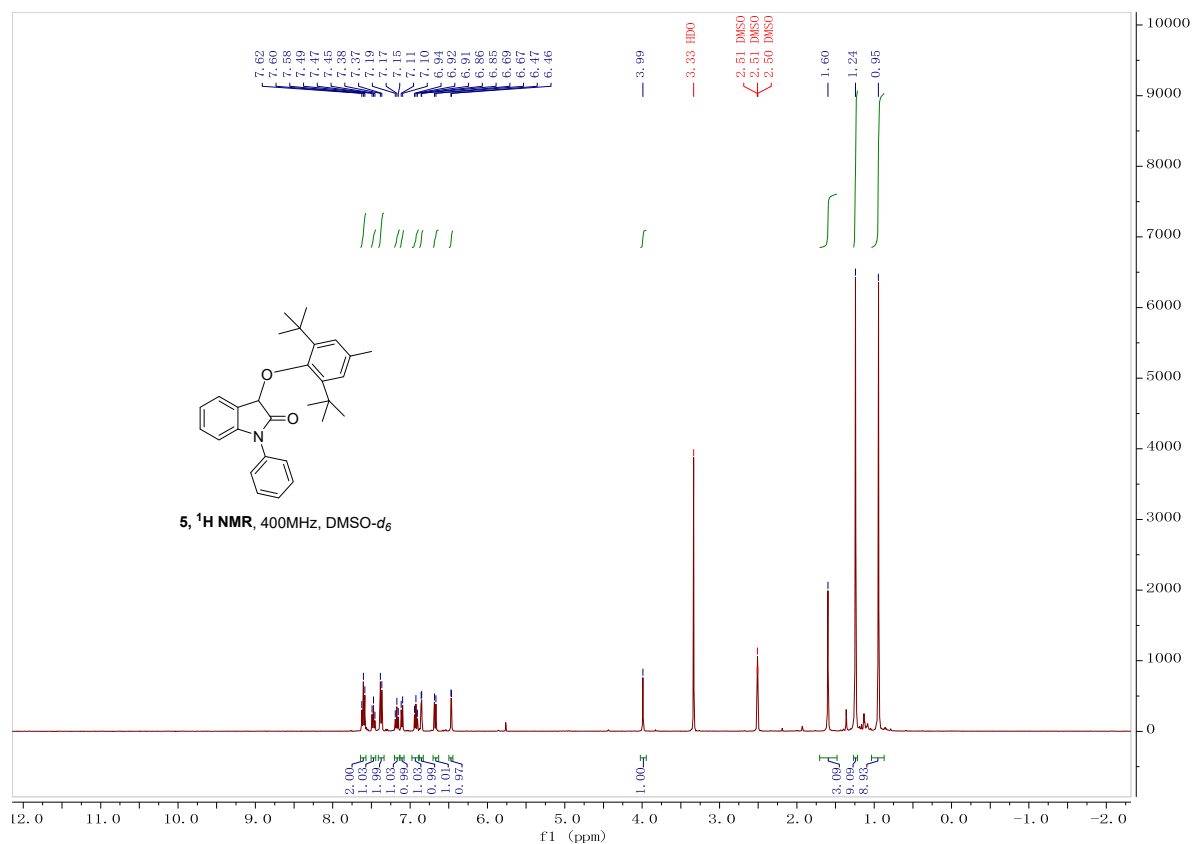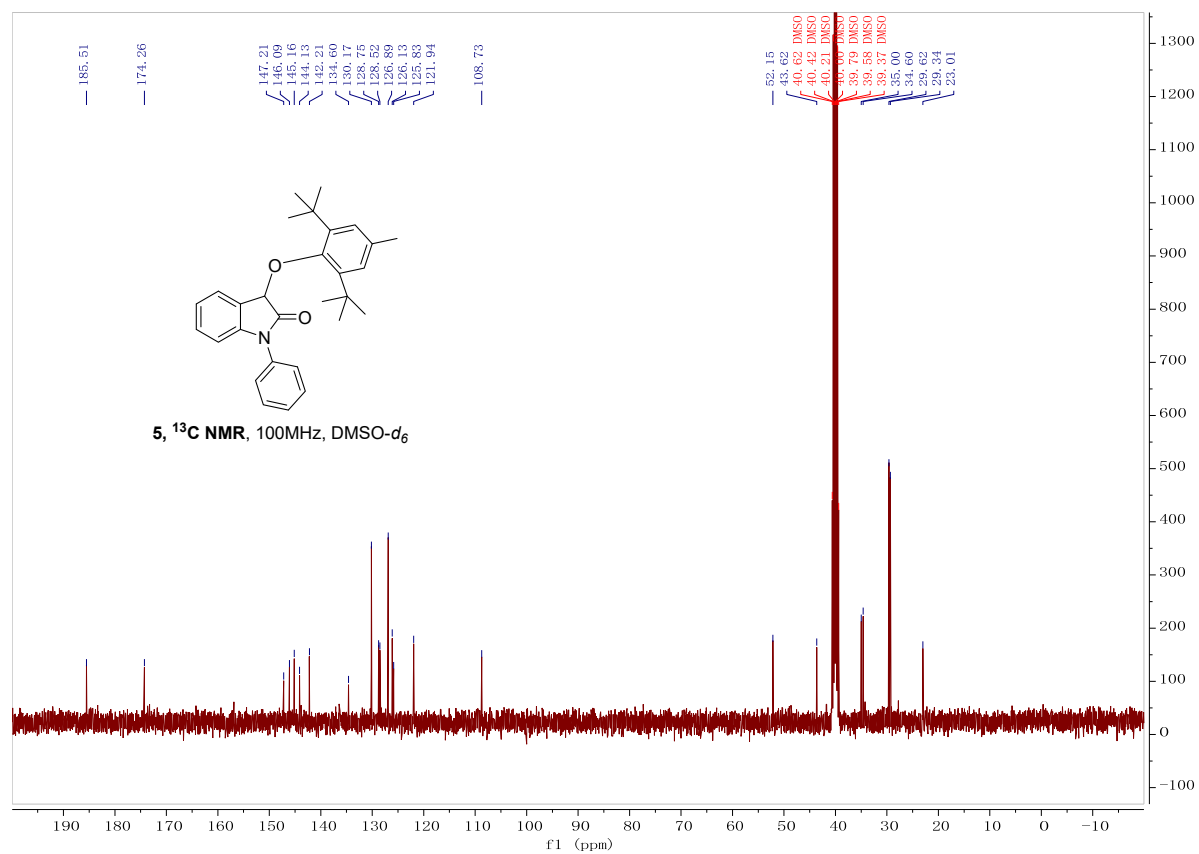

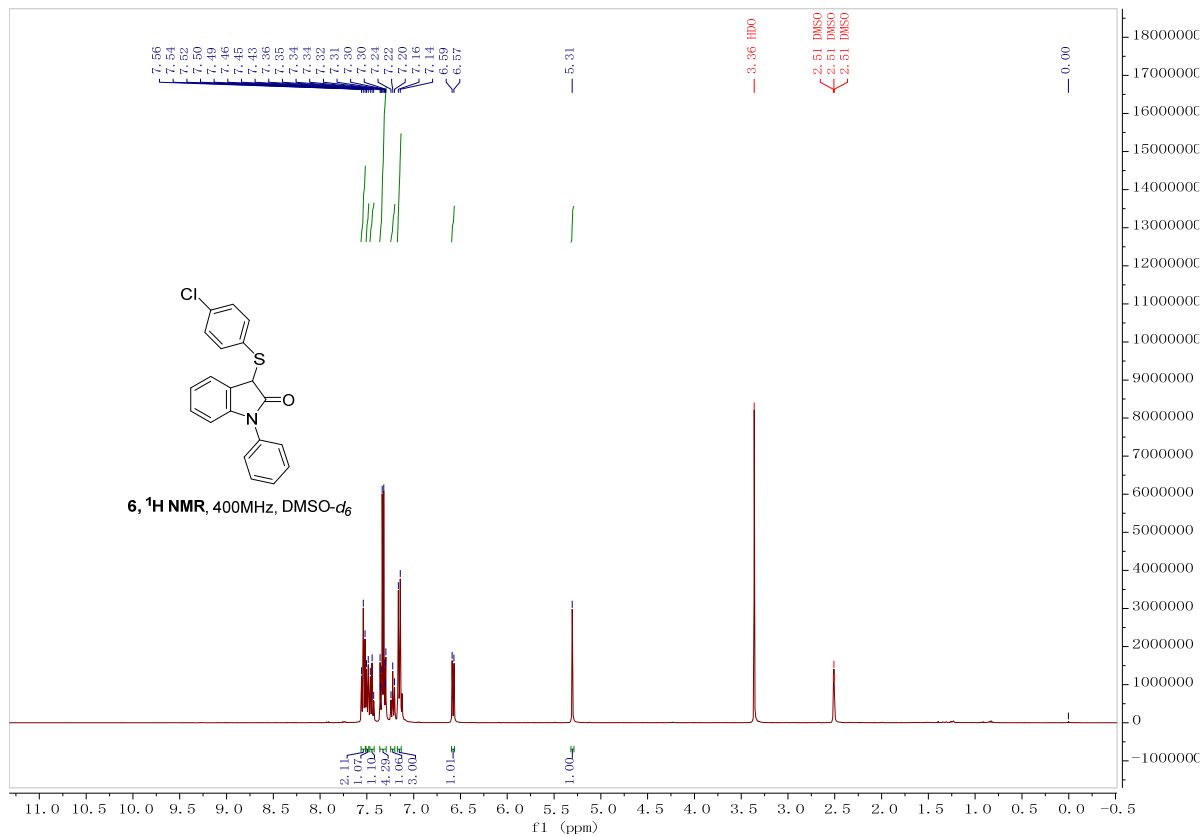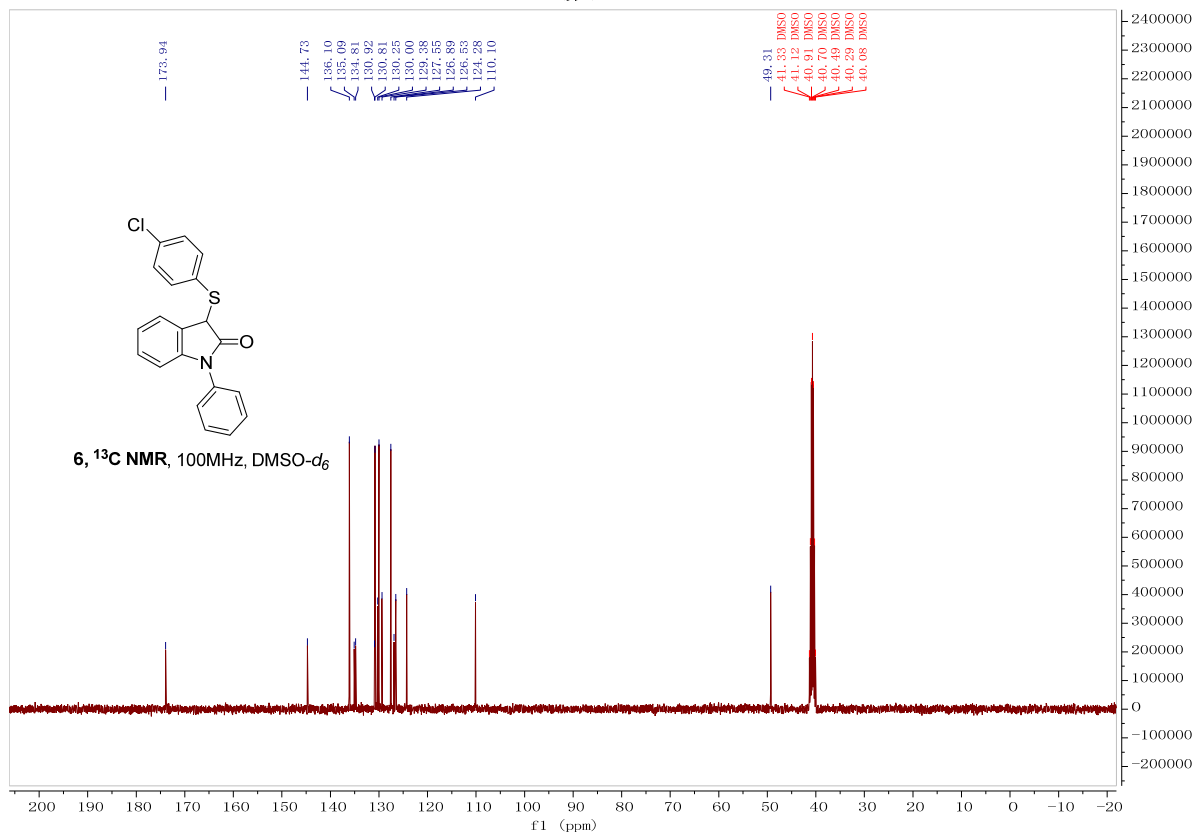

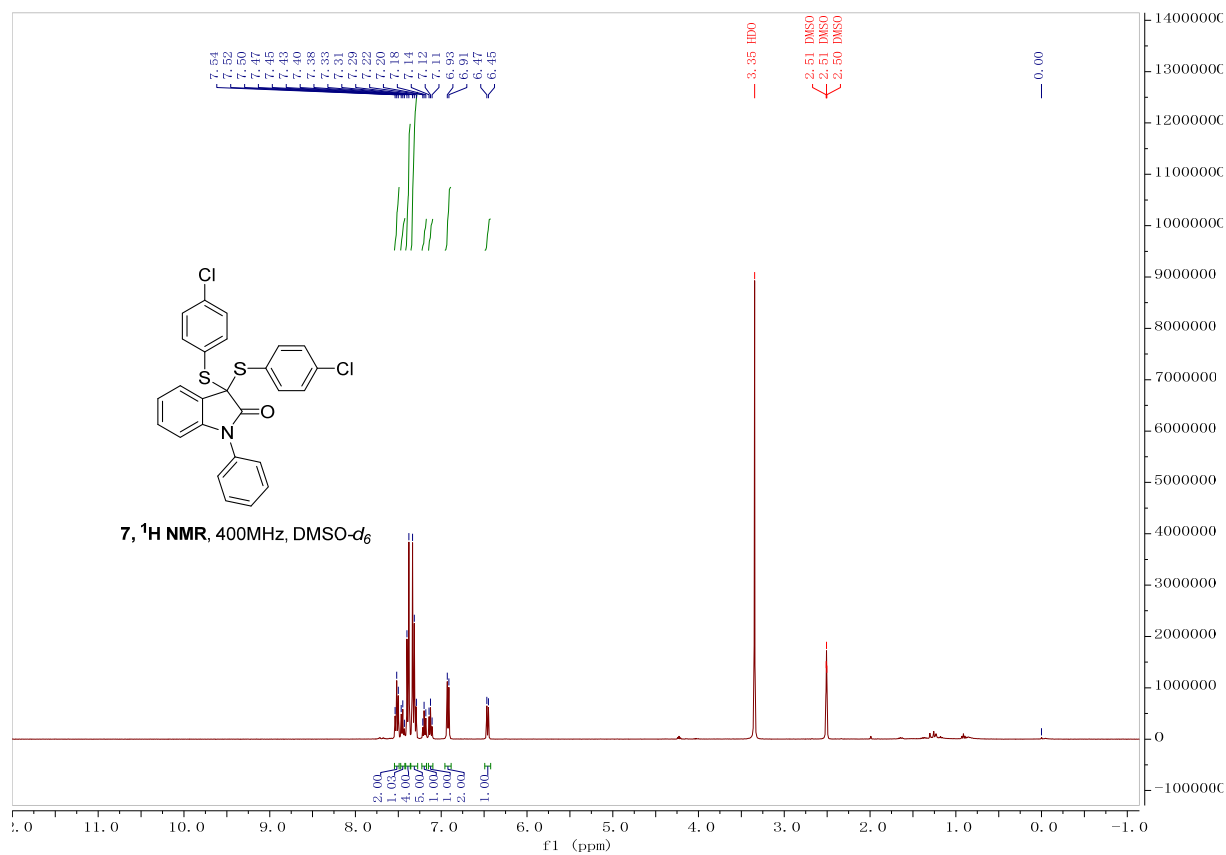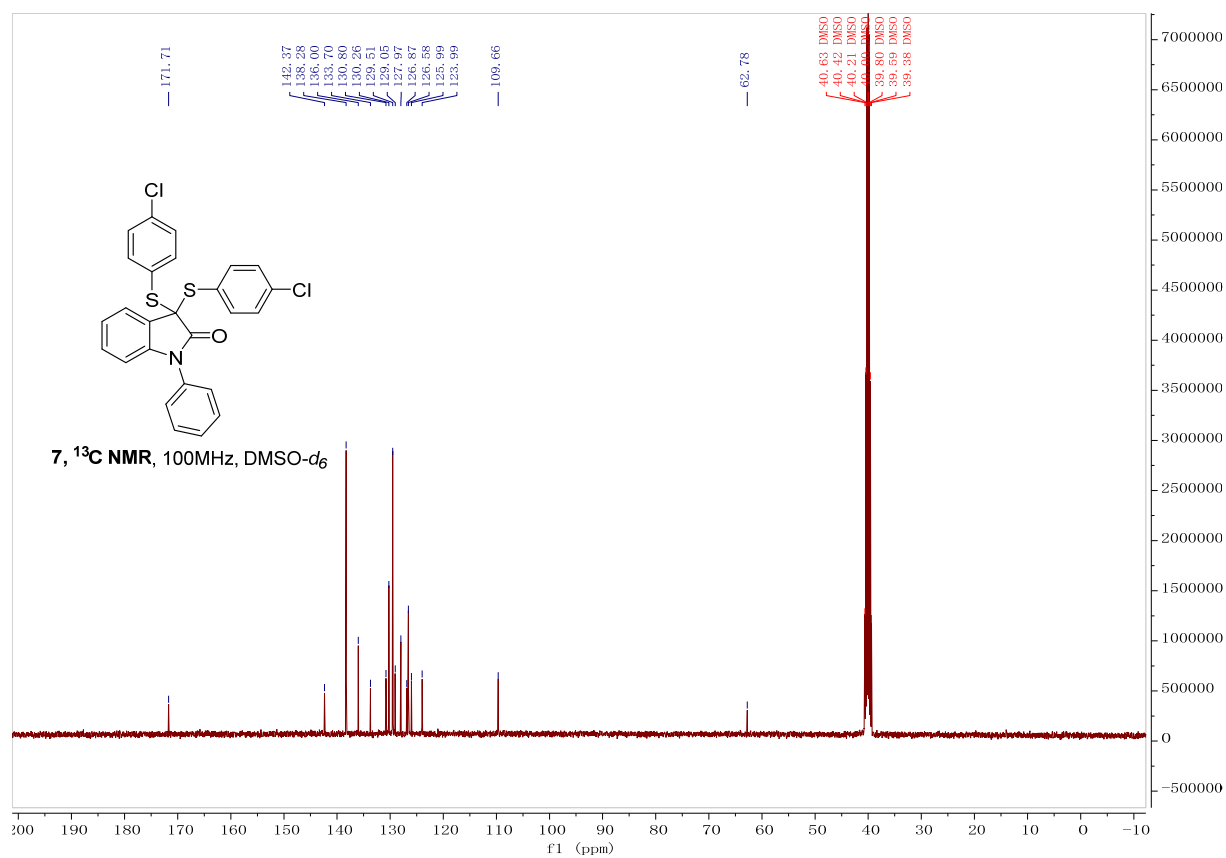

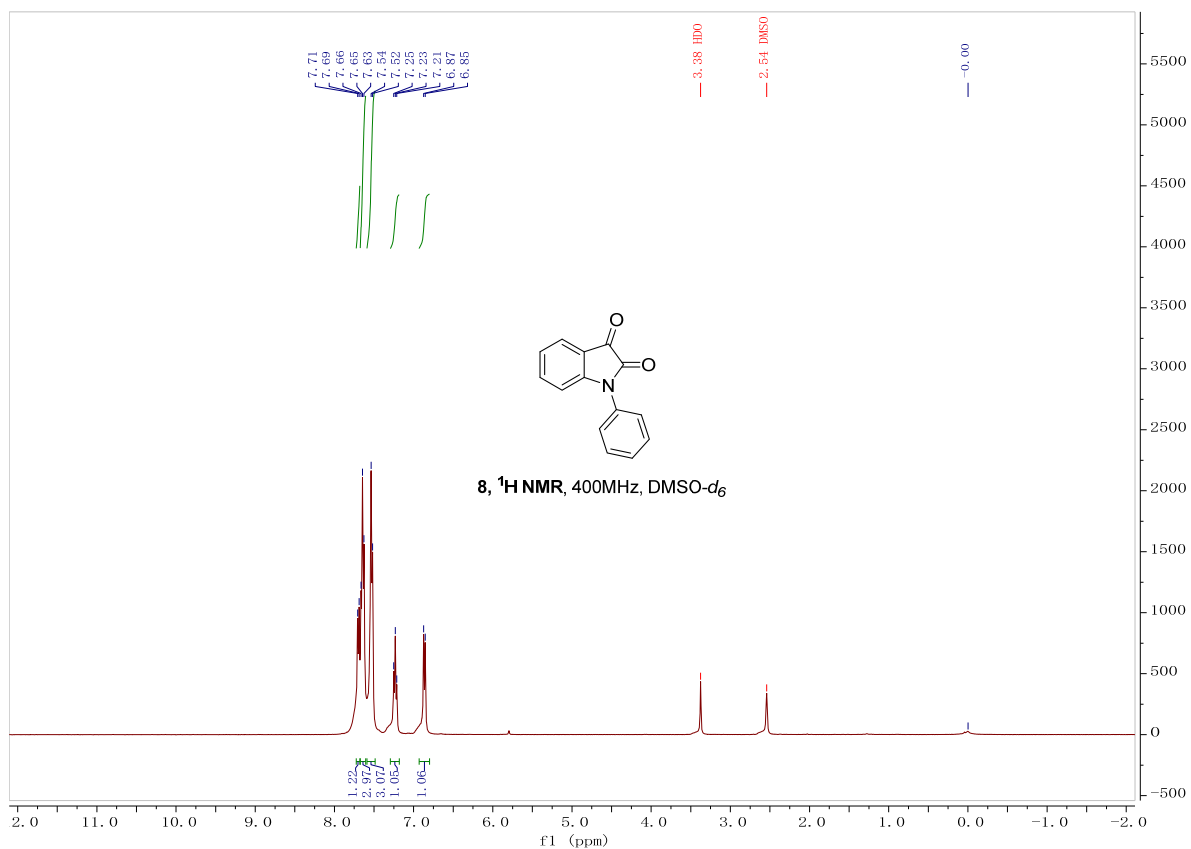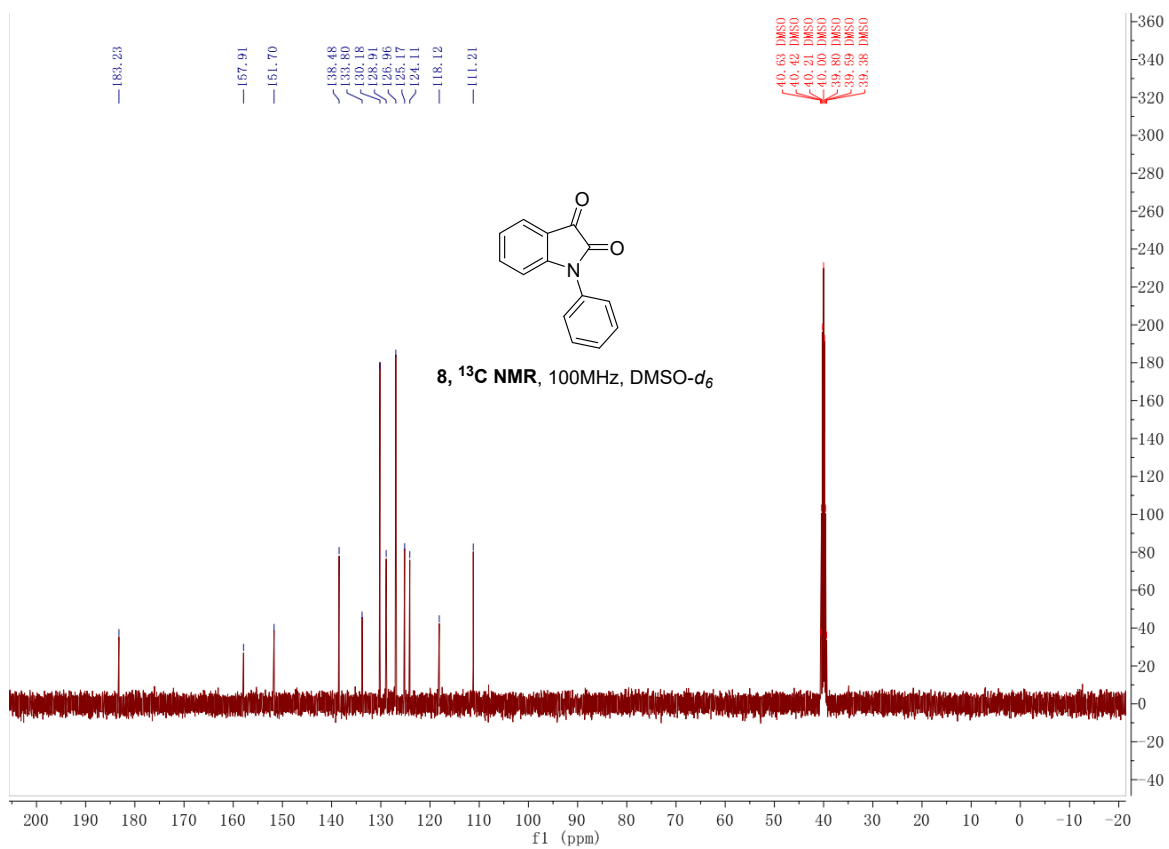

Supplement: d4qo00491d1.pdf [file d4qo00491d1.pdf]
